# Supplementary material for: Cross-coupling of CO and an isocyanide mediated by a tetrameric magnesium hydride cluster
Source: Royal Society of Chemistry journal article supplement (doi:10.1039/d4sc02638a), 2024-01-01
Supplement: d4sc02638a2.pdf [file d4sc02638a2.pdf]

## Supporting Information

# Cross-Coupling of CO and an Isocyanide Mediated by a Tetrameric Magnesium Hydride Cluster

Wenbang Yang, Andrew J. P. White, and Mark R. Crimmin\*

[m.crimmin@imperial.ac.uk](mailto:m.crimmin@imperial.ac.uk)

*Department of Chemistry, Molecular Sciences Research Hub, 82 Wood Lane, Shepherds Bush,  
London, W12 0BZ, UK.  
m.crimmin@imperial.ac.uk*

# Table of Contents

|                                                                   |             |
|-------------------------------------------------------------------|-------------|
| <b>1) General Experimental</b> .....                              | <b>S3</b>   |
| <b>2) Experimental Methods</b> .....                              | <b>S4</b>   |
| 2.1) Preparation of Compounds .....                               | S4          |
| 2.2) Reaction of 2c with CO .....                                 | S17         |
| 2.3) Thermolysis of 2a .....                                      | S18         |
| 2.4) Reaction of 2a with 2-isocyano-1,3-dimethylbenzene .....     | S20         |
| 2.5) Preparation of <sup>13</sup> C Labelled Samples .....        | S21         |
| 2.6) DOSY Spectrum of 3 <sub>2</sub> and 3-THF <sub>2</sub> ..... | S23         |
| <b>3) Single Crystal X-ray Diffraction Data</b> .....             | <b>S25</b>  |
| <b>4) DFT Studies</b> .....                                       | <b>S33</b>  |
| 4.1) Computational methods .....                                  | S33         |
| 4.2) Calculated Reaction Pathway .....                            | S34         |
| 4.3) NBO Analysis of Some Reaction Intermediates .....            | S36         |
| 4.4) QTAIM Analysis .....                                         | S43         |
| <b>5) NMR Spectroscopy</b> .....                                  | <b>S45</b>  |
| 5.1) NMR Spectra of Isolated complexes .....                      | S45         |
| 5.2) NMR Spectra for Determining the NMR Yields of 4b.....        | S51         |
| <b>6) IR Spectroscopy</b> .....                                   | <b>S53</b>  |
| <b>6) XYZ Coordinates</b> .....                                   | <b>S55</b>  |
| <b>7) References</b> .....                                        | <b>S105</b> |

## 1) General experimental

Standard Schlenk line and glovebox techniques were used for all manipulations under an inert atmosphere of dinitrogen or argon unless otherwise stated. NMR scale reactions were performed in J. Young NMR tubes. A MBraun Labmaster glovebox was employed, operating at <0.1 ppm O<sub>2</sub> and <0.1 ppm H<sub>2</sub>O.

**Instruments:** <sup>1</sup>H, <sup>13</sup>C NMR spectra were recorded on BRUKER 400 MHz or 500 MHz machines, and referenced against SiMe<sub>4</sub> (<sup>1</sup>H, <sup>13</sup>C). All peaks are referenced against residual solvent and values are quoted in ppm. Data were processed using the MestReNova software. Where needed, chemical shifts were assigned with the assistance of 2D NMR (COSY, HSQC, HMBC, DEPTQ) spectra. The coupling constants (J) are reported in Hertz (Hz). The following abbreviations are used to define multiplicities: s (singlet), d (doublet), t (triplet), q (quadruplet), hept. (heptet), dd (doublet of doublets), ddd (doublet of doublets of doublets), dt (doublet of triplets), td (triplet of doublets), m (multiplet).

Single crystal X-ray data was obtained on Agilent Diffraction Xcalibur PX Ultra A and Xcalibur 3 E diffractometers, and the structures were refined using the SHELXTL, SHELX-97, and SHELX-2013 program systems.

Infrared spectra were obtained on a Cary630 spectrometer (placed with in an MBraun glovebox) from crystalline solids or benzene thin-films on an ATR cell.

Elemental analyses were performed by Elemental Labs (<https://www.elementallab.co.uk/>).

**Chemicals:** Solvents were dried over activated alumina from a solvent purification system (SPS) based upon the Grubbs design and de-gassed before use. Glassware was dried for >6 h prior to use at 120 °C. Benzene-d<sub>6</sub> was de-gassed and stored over 3 Å molecular sieves before use. All reagents were acquired from Sigma Aldrich (Merck), Fluorochem, or VWR and used without further purification unless specified. CO was purchased from BOC Ltd and used as received. [NN-(MgH)<sub>2</sub>]<sub>2</sub> (NN = {NC(Me)CH(Me)CN-2,6-i-Pr<sub>2</sub>C<sub>6</sub>H<sub>3</sub>}<sub>2</sub>)<sup>[S1]</sup>, Mes<sup>2</sup>BDIAICl<sub>2</sub> (Mes<sup>2</sup>BDI = {MesNC(Me)}<sub>2</sub>CH)<sup>[S2]</sup>, (Dipp<sup>2</sup>BDIMgH)<sub>2</sub> (Dipp<sup>2</sup>BDI = {DippNC(Me)}<sub>2</sub>CH, Dipp = 2,6-di-isopropylphenyl)<sup>[S3]</sup> and isocyanomethane<sup>[S13]</sup> were prepared by literature procedures.

## 2) Experimental Methods

### 2.1 Preparation of Compounds

#### Preparation of **2a**

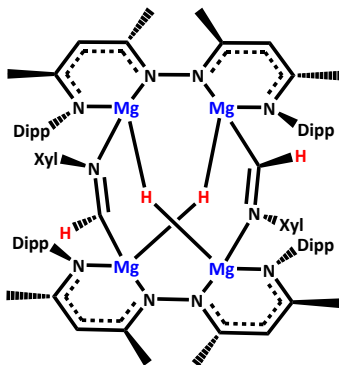

In a glovebox,  $[\text{NN}-(\text{MgH})_2]_2$  (40.0 mg, 0.035 mmol, 1 eq) and 2-isocyano-1,3-dimethylbenzene (9.3 mg, 0.07 mmol, 2 eq) were dissolved in  $\text{C}_6\text{D}_6$  (0.6 mL) and transferred to a J. Young NMR tube. The reaction mixture was kept at 25 °C for 3h. A  $^1\text{H}$  NMR spectrum was taken at this time point and showed the full conversion of  $[\text{NN}-(\text{MgH})_2]_2$  to **2a**. The J. Young NMR tube was returned to the glovebox, the reaction mixture was removed under vacuum and the crude dissolved in 1 mL  $\text{Et}_2\text{O}/n\text{-pentane}$  (1:1 v: v) mixture. The solution was filtered into a 4 mL vial and then placed in the glovebox freezer (−35 °C) for 2 days. Bright yellow crystals (**2a**) were successfully obtained. The filtrated crystals were washed with cold *n*-pentane (3 x 1mL) and then dried in vacuo. **Yield: 27 mg**, 0.021 mmol, 60%.

**$^1\text{H}$  NMR** ( $\text{C}_6\text{D}_6$ , 298 K, 400 MHz)  $\delta$ : 8.83 (s, 2H,  $\text{CH}=\text{NXyl}$ ), 7.22 – 7.16 (m, 4H,  $\text{ArCH}$ ), 7.09 (t,  $^3J_{\text{H-H}} = 7.7$  Hz, 2H, *p*- $\text{ArCH}$ ), 6.96 (t,  $^3J_{\text{H-H}} = 7.7$  Hz, 2H, *p*- $\text{ArCH}$ ), 6.82 (d,  $^3J_{\text{H-H}} = 7.5$  Hz, 2H, *m*- $\text{ArCH}$ ), 6.79 – 6.69 (m, 6H,  $\text{ArCH}$ ), 6.52 (d,  $^3J_{\text{H-H}} = 7.4$  Hz, 2H, *m*- $\text{ArCH}$ ), 4.68 (s, 2H,  $\text{CH}\{\text{C}(\text{CH}_3)_2\}_2$ ), 4.53 (s, 2H,  $\text{CH}\{\text{C}(\text{CH}_3)_2\}_2$ ), 3.52 (hept,  $^3J_{\text{H-H}} = 6.7$  Hz, 2H,  $\text{CH}(\text{CH}_3)_2$ ), 3.51 (hept,  $^3J_{\text{H-H}} = 7.0$  Hz, 2H,  $\text{CH}(\text{CH}_3)_2$ ), 3.38 (s, 2H,  $\text{Mg-H-Mg}$ ), 3.33 (hept,  $^3J_{\text{H-H}} = 6.8$  Hz, 2H,  $\text{CH}(\text{CH}_3)_2$ ), 2.82 (hept,  $^3J_{\text{H-H}} = 6.8$  Hz, 2H,  $\text{CH}(\text{CH}_3)_2$ ), 1.88 (s, 6H, 2x  $\text{NC}(\text{CH}_3)$ ), 1.87 (s, 6H, 2x  $\text{NC}(\text{CH}_3)$ ), 1.78 (s, 6H, 2x  $\text{NC}(\text{CH}_3)$ ), 1.77 (s, 6H,  $\text{Xyl-CH}_3$ ), 1.68 (s, 6H, 2x  $\text{NC}(\text{CH}_3)$ ), 1.55 (d,  $^3J_{\text{H-H}} = 6.7$  Hz, 6H,  $(\text{CH}(\text{CH}_3)_2)$ ), 1.46 (d,  $^3J_{\text{H-H}} = 6.7$  Hz, 6H,  $(\text{CH}(\text{CH}_3)_2)$ ), 1.45 (d,  $^3J_{\text{H-H}} = 6.9$  Hz, 6H,  $(\text{CH}(\text{CH}_3)_2)$ ), 1.41 (d,  $^3J_{\text{H-H}} = 6.9$  Hz, 6H,  $(\text{CH}(\text{CH}_3)_2)$ ), 1.34 (s, 6H,  $\text{Xyl-CH}_3$ ), 1.04 (d,  $^3J_{\text{H-H}} = 6.9$  Hz, 6H,  $(\text{CH}(\text{CH}_3)_2)$ ), 0.97 (d,  $^3J_{\text{H-H}} = 6.7$  Hz, 6H,  $(\text{CH}(\text{CH}_3)_2)$ ), 0.75 (d,  $^3J_{\text{H-H}} = 6.8$  Hz, 6H,  $(\text{CH}(\text{CH}_3)_2)$ ), 0.42 (d,  $^3J_{\text{H-H}} = 6.9$  Hz, 6H,  $(\text{CH}(\text{CH}_3)_2)$ ).

**$^{13}\text{C}$  NMR** ( $\text{C}_6\text{D}_6$ , 298 K, 101 MHz)  $\delta$ : 167.4 (2x  $\text{CH}\{\text{C}(\text{CH}_3)_2\}_2$ ), 166.5 (2x  $\text{CH}\{\text{C}(\text{CH}_3)_2\}_2$ ), 165.8 (2x  $\text{CH}\{\text{C}(\text{CH}_3)_2\}_2$ ), 165.2 (2x  $\text{CH}\{\text{C}(\text{CH}_3)_2\}_2$ ), 157.7 ( $\text{CH}=\text{NXyl}$ ), 146.7 ( $\text{Ar-C}$ ), 143.0 ( $\text{Ar-C}$ ), 142.8 ( $\text{Ar-C}$ ), 142.5 ( $\text{Ar-C}$ ), 142.2 ( $\text{Ar-C}$ ), 129.4 ( $\text{Ar-CH}$ ), 129.0 ( $\text{Ar-CH}$ ), 127.5 ( $\text{Ar-CH}$ ), 125.2 ( $\text{Ar-CH}$ ), 124.7 ( $\text{Ar-CH}$ ), 124.4 ( $\text{Ar-CH}$ ), 124.2 ( $\text{Ar-CH}$ ), 123.7 ( $\text{Ar-CH}$ ), 123.3 ( $\text{Ar-CH}$ ), 92.1 (2x  $\text{CH}\{\text{C}(\text{CH}_3)_2\}_2$ ), 92.0 (2x  $\text{CH}\{\text{C}(\text{CH}_3)_2\}_2$ ), 29.4 (2x  $\text{CH}(\text{CH}_3)_2$ ), 28.0 (2x  $\text{CH}(\text{CH}_3)_2$ ), 27.8 (2x  $\text{CH}(\text{CH}_3)_2$ ), 27.6 (2x  $\text{CH}(\text{CH}_3)_2$ ),

27.1 (2x CH(CH<sub>3</sub>)<sub>2</sub>), 26.4 (2x CH(CH<sub>3</sub>)<sub>2</sub>), 25.7 (2x CH(CH<sub>3</sub>)<sub>2</sub>), 24.8 (2x CH(CH<sub>3</sub>)<sub>2</sub>), 24.6 (2x CH(CH<sub>3</sub>)<sub>2</sub>), 24.6 (2x CH(CH<sub>3</sub>)<sub>2</sub>), 24.5 (2x CH(CH<sub>3</sub>)<sub>2</sub>), 23.8 (2x NC(CH<sub>3</sub>)), 23.7 (2x CH(CH<sub>3</sub>)<sub>2</sub>), 22.1 (2x NC(CH<sub>3</sub>)), 22.0 (2x NC(CH<sub>3</sub>)), 19.9 (2x NC(CH<sub>3</sub>)), 19.0 (2x Xyl-CH<sub>3</sub>), 18.7 (2x Xyl-CH<sub>3</sub>). Some ArC resonances are overlapping and cannot be observed.

**IR (ATR, cm<sup>-1</sup>):** 2993(w), 2959(s), 2923(m), 2884(m), 2866(m), 2659(w), 1810(m), 1531(m), 1509(s), 1477(m), 1456(m), 1435(s), 1376(s), 1357(s), 1311(s), 1276(m), 1251(m), 1234(m).

**Anal. Calc. (C<sub>80</sub>H<sub>106</sub>Mg<sub>4</sub>N<sub>10</sub>):** C, 74.36; H, 8.56; N, 10.08. Found: C, 73.15; H, 8.43; N, 10.87.

## Preparation of 2b

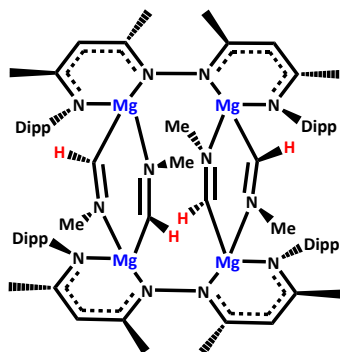

In a glovebox,  $[\text{NN}-(\text{MgH})_2]_2$  (20.0 mg, 0.018 mmol, 1 eq) and isocyanomethane (2.9 mg, 0.071 mmol, 4 eq) were dissolved in  $\text{C}_6\text{D}_6$  (0.6 mL) and transferred to a J. Young NMR tube. The reaction mixture was kept at 25 °C for 16 hours. A  $^1\text{H}$  NMR spectrum was taken at this time point and showed the full conversion of  $[\text{NN}-(\text{MgH})_2]_2$  to **2b**. Yellow crystals (**2b**) were successfully obtained from  $\text{C}_6\text{D}_6$  after crystallizing for 3 days at 25 °C. The filtrated crystals were washed with cold n-pentane (3 x 1mL) and then dried in vacuo. **Yield: 12 mg**, 0.009 mmol, 52%.

$^1\text{H}$  NMR ( $\text{C}_6\text{D}_6$ , 298 K, 400 MHz)  $\delta$ : 9.46 (s, 2H,  $\text{CHN}-\text{CH}_3$ ), 9.45 (s, 2H,  $\text{CHN}-\text{CH}_3$ ), 7.11 – 7.05 (overlapping signals, 8H, ArH), 6.97 (d,  $^3J_{\text{H-H}} = 7.6$  Hz, 4H, ArH), 4.74 (s, 4H,  $\text{CH}\{\text{C}(\text{CH}_3)_2\}$ ), 3.52 (hept,  $^3J_{\text{H-H}} = 6.9$  Hz, 4H,  $\text{CH}(\text{CH}_3)_2$ ), 3.04 (s, 6H,  $(\text{NC}(\text{CH}_3))$ ), 3.03 (s, 6H,  $(\text{NC}(\text{CH}_3))$ ), 2.82 (hept,  $^3J_{\text{H-H}} = 6.9$  Hz, 4H,  $\text{CH}(\text{CH}_3)_2$ ), 2.18 (s, 12H, 4x  $\text{NC}(\text{CH}_3)$ ), 1.62 (s, 12H, 4x  $\text{NC}(\text{CH}_3)$ ), 1.35 (d,  $^3J_{\text{H-H}} = 7.0$  Hz, 12H,  $(\text{CH}(\text{CH}_3)_2)$ ), 1.20 (d,  $^3J_{\text{H-H}} = 6.9$  Hz, 12H,  $(\text{CH}(\text{CH}_3)_2)$ ), 1.13 (d,  $^3J_{\text{H-H}} = 6.8$  Hz, 12H,  $(\text{CH}(\text{CH}_3)_2)$ ), 0.17 (d,  $^3J_{\text{H-H}} = 6.8$  Hz, 12H,  $(\text{CH}(\text{CH}_3)_2)$ ).

$^{13}\text{C}$  NMR ( $\text{C}_6\text{D}_6$ , 298 K, 101 MHz)  $\delta$ : 238.5 (4x  $\text{CHN}-\text{CH}_3$ ), 166.5 (4x  $\text{CH}\{\text{C}(\text{CH}_3)_2\}$ ), 166.4 (4x  $\text{CH}\{\text{C}(\text{CH}_3)_2\}$ ), 146.0 (Ar-C), 142.8 (Ar-C), 142.0 (Ar-C), 124.9 (Ar-CH), 124.2 (Ar-CH), 123.6 (Ar-CH), 92.0 (4x  $\text{CH}\{\text{C}(\text{CH}_3)_2\}$ ), 57.2 (4x  $\text{N}=\text{C}-\text{CH}_3$ ), 28.0 (4x  $\text{CH}(\text{CH}_3)_2$ ), 27.1 (4x  $\text{CH}(\text{CH}_3)_2$ ), 24.8 (4x  $\text{CH}(\text{CH}_3)_2$ ), 24.4 (4x  $\text{CH}(\text{CH}_3)_2$ ), 24.3 (4x  $\text{CH}(\text{CH}_3)_2$ ), 24.1 (4x  $\text{CH}(\text{CH}_3)_2$ ), 23.8 (4x  $\text{NC}(\text{CH}_3)$ ), 21.4 (4x  $\text{NC}(\text{CH}_3)$ ). Some ArC resonances are overlapping and cannot be observed.

**Anal. Calc. ( $\text{C}_{76}\text{H}_{110}\text{Mg}_4\text{N}_{12}$ ):** C, 70.82; H, 8.60; N, 13.04. Found: C, 73.26; H, 8.69; N, 11.01. Due to the highly sensitive nature of this compound CHN results do not match the expected values.

(Note: Handling and Hazards of Isocyanomethane: Class A or B gas filters should be used as respiratory protection, depending on the product. Safety gloves made from butyl or fluorinated rubber should be worn (BGR 190) / (GUV-R 190). Isocyanomethane should store over fresh 3 Å molecular sieves at -35 °C under  $\text{N}_2$ , away from light. Isocyanomethane can be quenched with bleach. Isocyanomethane has no indication of carcinogenicity to humans (not

listed by IARC). Cyanide poisoning is identified by rapid, deep breathing and shortness of breath, general weakness, giddiness, headaches, vertigo, confusion, convulsions/seizures and eventually loss of consciousness.<sup>[S14]</sup> Antidotes to cyanide poisoning include hydroxocobalamin and sodium nitrite, which release the cyanide from the cytochrome system, and rhodanese, which is an enzyme occurring naturally in mammals that combines serum cyanide with thiosulfate, producing comparatively harmless thiocyanate. Oxygen therapy can also be administered.<sup>[S14]</sup>

## Preparation of **3**<sub>2</sub>

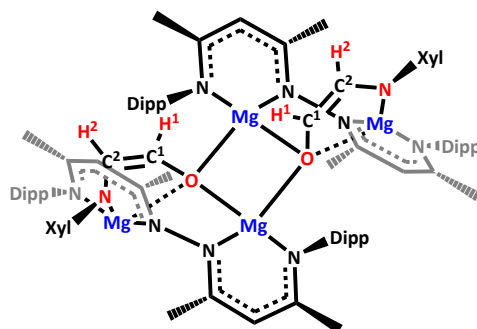

**Method One:** In a glovebox, [NN-(MgH)<sub>2</sub>]<sub>2</sub> (20.0 mg, 0.018 mmol, 1 eq) and 2-isocyano-1,3-dimethylbenzene (4.7 mg, 0.035 mmol, 2 eq) were dissolved in C<sub>6</sub>D<sub>6</sub> (0.6 mL) and transferred to a J. Young NMR tube. The mixture was allowed to react for 1 hour at 25 °C. The reaction mixture was frozen at –78 °C and the NMR tube was evacuated, CO gas (~1.5 bar, ~ 0.135 mmol) was introduced and the reaction mixture was heated at 60 °C for 14 hours. A <sup>1</sup>H NMR spectrum was taken at this time point and showed the full conversion of [NN-(MgH)<sub>2</sub>]<sub>2</sub> to **3**<sub>2</sub>. The J. Young NMR tube was returned to the glovebox, the solvent was removed under vacuum and the crude product dissolved in 1 mL of a Et<sub>2</sub>O/n-pentane (1:1 v: v) mixture. The solution was filtered into a 4 mL vial and then placed in the glovebox freezer (–35 °C) for about 2 days. Bright yellow crystals (**3**<sub>2</sub>) were successfully obtained. The filtrated crystals were washed with cold n-pentane (3 x 1mL) and then dried in vacuo. **Yield: 8 mg**, 0.006 mmol, 31%.

**Method Two:** In a glovebox, **2a** (20.0 mg, 0.014 mmol, 1 eq) was dissolved in C<sub>6</sub>D<sub>6</sub> (0.6 mL) and transferred to a J. Young NMR tube. The NMR tube was frozen and evacuated, CO gas (~1.5 bar, ~ 0.135 mmol) was introduced into the NMR tube and the reaction mixture was heated at 60 °C for 14 hours. A <sup>1</sup>H NMR spectrum was taken at this time point and showed the full conversion of **2a** to **3**<sub>2</sub>. The J. Young NMR tube was returned to the glovebox, the solvent was removed under vacuum and the crude product dissolved in 1 mL a Et<sub>2</sub>O/n-pentane (1:1 v: v) mixture. The solution was filtered into a 4 mL vial and then placed in the glovebox freezer (–35 °C) for about 2 days. Bright yellow crystals (**3**<sub>2</sub>) were successfully obtained. The filtrated crystals were washed with cold n-pentane (3 x 1mL) and then dried in vacuo. **Yield: 7 mg**, 0.005 mmol, 35%.

**<sup>1</sup>H NMR** (C<sub>6</sub>D<sub>6</sub>, 298 K, 400 MHz) δ: 7.20 – 6.88 (overlapping signals, 18H, ArH), 6.29 (d, <sup>3</sup>J<sub>H-H</sub> = 2.2 Hz, 2H, OC<sup>1</sup>H<sup>1</sup>=C<sup>2</sup>H<sup>2</sup>NXyl), 5.03 (d, <sup>3</sup>J<sub>H-H</sub> = 2.2 Hz, 2H, OC<sup>1</sup>H<sup>1</sup>=C<sup>2</sup>H<sup>2</sup>NXyl), 4.74 (s, 2H, CH{C(CH<sub>3</sub>)<sub>2</sub>}), 4.54 (s, 2H, CH{C(CH<sub>3</sub>)<sub>2</sub>}), 3.39 (hept, <sup>3</sup>J<sub>H-H</sub> = 6.8 Hz, 2H, CH(CH<sub>3</sub>)<sub>2</sub>), 3.35 (hept, <sup>3</sup>J<sub>H-H</sub> = 6.6 Hz, 2H, CH(CH<sub>3</sub>)<sub>2</sub>), 3.07 (hept, <sup>3</sup>J<sub>H-H</sub> = 6.6 Hz, 2H, CH(CH<sub>3</sub>)<sub>2</sub>), 2.85 (hept, <sup>3</sup>J<sub>H-H</sub> = 6.8 Hz, 2H, CH(CH<sub>3</sub>)<sub>2</sub>), 2.24 (s, 6H, Xyl-CH<sub>3</sub>), 2.09 (s, 6H, 2x NC(CH<sub>3</sub>)), 1.81 (s, 6H, 2x NC(CH<sub>3</sub>)), 1.66 (s, 6H, 2x NC(CH<sub>3</sub>)), 1.60 (s, 6H, 2x NC(CH<sub>3</sub>)), 1.44 (d, <sup>3</sup>J<sub>H-H</sub> = 7.0 Hz, 6H, (CH(CH<sub>3</sub>)<sub>2</sub>), 1.43 (s, 6H, Xyl-CH<sub>3</sub>), 1.23 (d, <sup>3</sup>J<sub>H-H</sub> = 6.7 Hz, 6H, (CH(CH<sub>3</sub>)<sub>2</sub>), 1.22 (d, <sup>3</sup>J<sub>H-H</sub> = 6.7 Hz, 6H, (CH(CH<sub>3</sub>)<sub>2</sub>), 1.21 (d, <sup>3</sup>J<sub>H-H</sub>



= 6.8 Hz, 6H, (CH(CH<sub>3</sub>)<sub>2</sub>), 1.04 (d, <sup>3</sup>J<sub>H-H</sub> = 6.8 Hz, 6H, (CH(CH<sub>3</sub>)<sub>2</sub>), 0.92 (d, <sup>3</sup>J<sub>H-H</sub> = 6.7 Hz, 6H, (CH(CH<sub>3</sub>)<sub>2</sub>), 0.46 (d, <sup>3</sup>J<sub>H-H</sub> = 6.9 Hz, 6H, (CH(CH<sub>3</sub>)<sub>2</sub>), 0.40 (d, <sup>3</sup>J<sub>H-H</sub> = 6.7 Hz, 6H, (CH(CH<sub>3</sub>)<sub>2</sub>))

**<sup>13</sup>C NMR** (C<sub>6</sub>D<sub>6</sub>, 298 K, 101 MHz) δ: 168.6 (2x CH{C(CH<sub>3</sub>)<sub>2</sub>}), 167.9 (2x CH{C(CH<sub>3</sub>)<sub>2</sub>}), 167.3 (2x CH{C(CH<sub>3</sub>)<sub>2</sub>}), 166.9 (2x CH{C(CH<sub>3</sub>)<sub>2</sub>}), 152.5 (Ar-C), 152.2 (OC<sup>1</sup>H<sup>1</sup>=C<sup>2</sup>H<sup>2</sup>NXyl), 147.1 (Ar-C), 146.1 (Ar-C), 143.4 (Ar-C), 143.0 (Ar-C), 142.4 (Ar-C), 142.3 (Ar-C), 134.2 (Ar-C), 134.1 (Ar-C), 125.6 (Ar-CH), 125.5 (Ar-CH), 124.6 (Ar-CH), 124.4 (Ar-CH), 124.2 (Ar-CH), 123.6 (Ar-CH), 123.0 (Ar-CH), 102.9 (OC<sup>1</sup>H<sup>1</sup>=C<sup>2</sup>H<sup>2</sup>NXyl), 93.5 (2x CH{C(CH<sub>3</sub>)<sub>2</sub>}), 92.4 (2x CH{C(CH<sub>3</sub>)<sub>2</sub>}), 29.2 (2x CH(CH<sub>3</sub>)<sub>2</sub>), 28.4 (2x CH(CH<sub>3</sub>)<sub>2</sub>), 27.9 (2x CH(CH<sub>3</sub>)<sub>2</sub>), 27.6 (2x CH(CH<sub>3</sub>)<sub>2</sub>), 26.6 (2x CH(CH<sub>3</sub>)<sub>2</sub>), 25.5 (2x CH(CH<sub>3</sub>)<sub>2</sub>), 25.4 (2x CH(CH<sub>3</sub>)<sub>2</sub>), 25.3 (2x CH(CH<sub>3</sub>)<sub>2</sub>), 24.9 (2x CH(CH<sub>3</sub>)<sub>2</sub>), 24.4 (2x NC(CH<sub>3</sub>)), 24.3 (2x NC(CH<sub>3</sub>)), 24.2 (2x CH(CH<sub>3</sub>)<sub>2</sub>), 22.6 (2x CH(CH<sub>3</sub>)<sub>2</sub>), 22.0 (2x CH(CH<sub>3</sub>)<sub>2</sub>), 20.5 (2x NC(CH<sub>3</sub>)), 19.8 (2x NC(CH<sub>3</sub>)), 19.7 (2x Xyl-CH<sub>3</sub>), 17.80 (2x Xyl-CH<sub>3</sub>). Some ArC resonances are overlapping and cannot be observed.

**IR (ATR, cm<sup>-1</sup>):** 2959(s), 2925(s), 2886(s), 2866(s), 1957(m), 1812(m), 1601(m), 1519(m), 1477(s), 1458(w), 1435(m), 1415(w), 1384(m), 1358(w), 1314(m), 1254(m), 1231(w).

**Anal. Calc. (C<sub>96</sub>H<sub>138</sub>Mg<sub>4</sub>N<sub>10</sub>O<sub>4</sub>):** C, 72.36; H, 8.73; N, 8.79. Found: C, 72.39; H, 8.22; N, 8.43. The CHN results match the expected values for **3<sub>2</sub>-(OEt<sub>2</sub>)<sub>2</sub>**.

$^1\text{H}$  NMR data showing the time course of the reaction of **2a** with CO

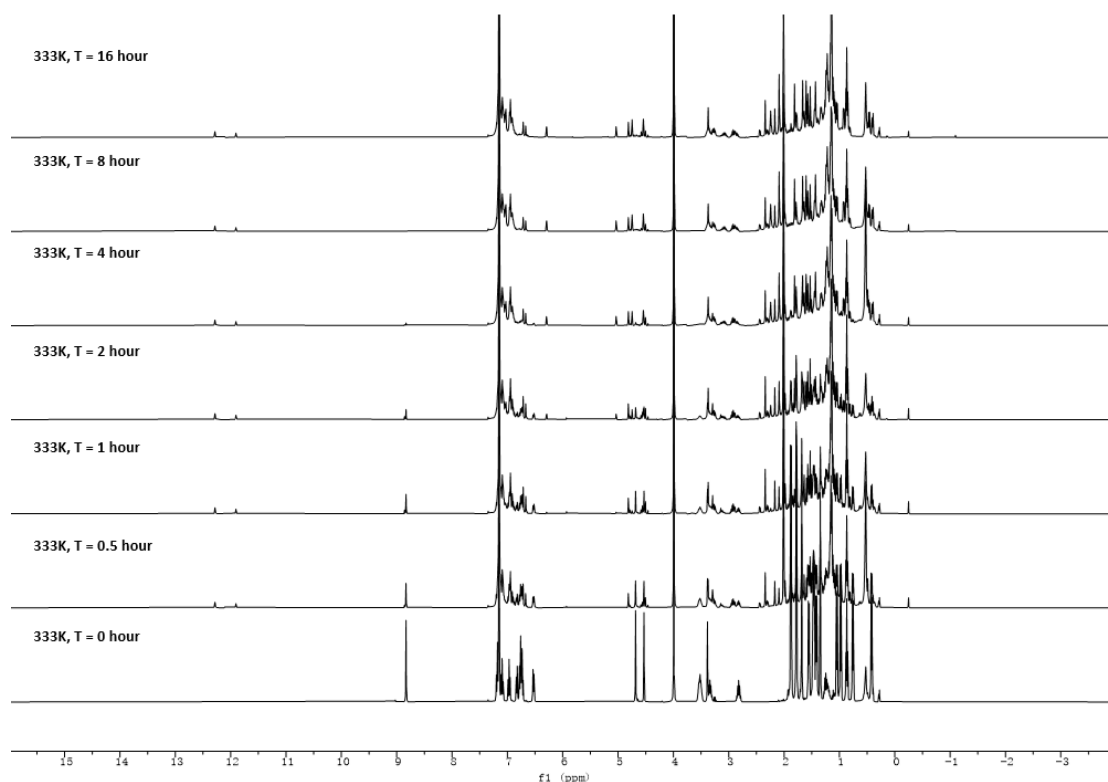

**Figure S1.** Reaction of **2a** with CO followed by  $^1\text{H}$  NMR spectroscopy

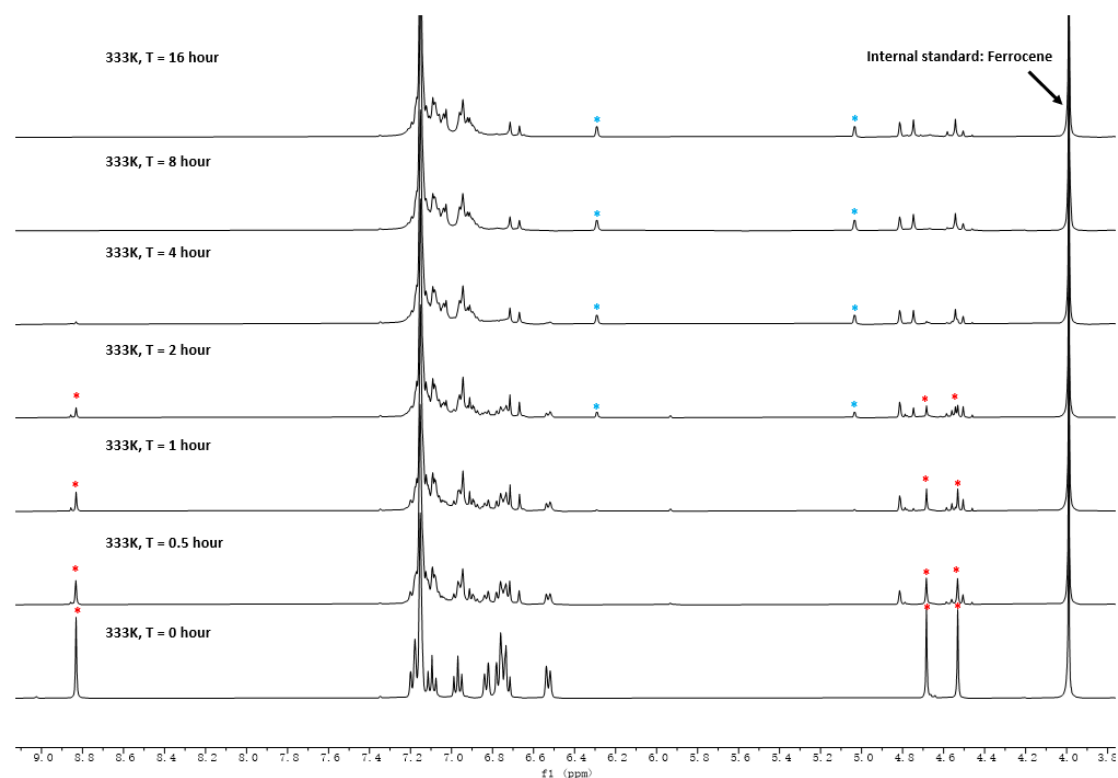

**Figure S2.** NMR spectra from kinetic experiments. ( $^1\text{H}$  NMR ( $\text{C}_6\text{D}_6$ , 400 MHz): ("\*" is the peak of **3<sub>2</sub>**, "\*" is the peak of **2a**).

## Preparation of $3_2$ - $^{13}\text{C}$

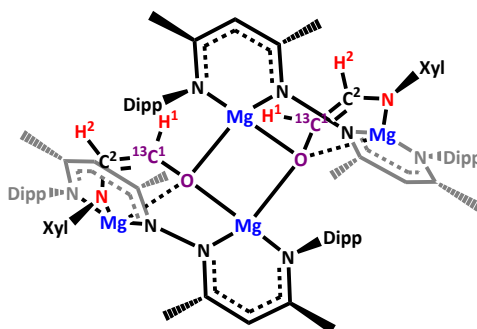

In a glovebox, **2a** (20.0 mg, 0.014 mmol, 1 eq) was dissolved in  $\text{C}_6\text{D}_6$  (0.6 mL) and transferred to a J. Young NMR tube. The reaction mixture was frozen at  $-78^\circ\text{C}$  and the NMR tube was evacuated,  $^{13}\text{CO}$  gas ( $\sim 1.5$  bar, about 0.135 mmol, 3.78 mg) was introduced into the NMR tube and the reaction mixture was heated at  $60^\circ\text{C}$  for 14 hours. A  $^1\text{H}$  NMR spectrum was taken at this time point and showed the full conversion of **2a** to **3<sub>2</sub>- $^{13}\text{C}$** .  $^1\text{H}$  NMR,  $^{13}\text{C}$  NMR and some 2D (COSY, HSQC, HMBC, DEPTQ) spectra were taken at this time point and showed the full conversion of **2** to **3<sub>2</sub>- $^{13}\text{C}$** .

**$^1\text{H}$  NMR** ( $\text{C}_6\text{D}_6$ , 298 K, 400 MHz)  $\delta$ : 7.20 – 6.88 (overlapping signals, 18H, ArH), 6.29 (d,  $^3J_{\text{H-H}} = 13.9$ , 2.2 Hz, 2H,  $\text{O}^{13}\text{C}^1\text{H}^1=\text{C}^2\text{H}^2\text{NXyl}$ ), 5.03 (d,  $^3J_{\text{H-H}} = 174.8$ , 2.2 Hz, 2H,  $\text{O}^{13}\text{C}^1\text{H}^1=\text{C}^2\text{H}^2\text{NXyl}$ ), 4.74 (s, 2H,  $\text{CH}\{\text{C}(\text{CH}_3)_2\}$ ), 4.54 (s, 2H,  $\text{CH}\{\text{C}(\text{CH}_3)_2\}$ ), 3.39 (hept,  $^3J_{\text{H-H}} = 6.8$  Hz, 2H,  $\text{CH}(\text{CH}_3)_2$ ), 3.35 (hept,  $^3J_{\text{H-H}} = 6.6$  Hz, 2H,  $\text{CH}(\text{CH}_3)_2$ ), 3.07 (hept,  $^3J_{\text{H-H}} = 6.6$  Hz, 2H,  $\text{CH}(\text{CH}_3)_2$ ), 2.85 (hept,  $^3J_{\text{H-H}} = 6.8$  Hz, 2H,  $\text{CH}(\text{CH}_3)_2$ ), 2.24 (s, 6H, Xyl- $\text{CH}_3$ ), 2.09 (s, 6H, 2x NC( $\text{CH}_3$ )), 1.81 (s, 6H, 2x NC( $\text{CH}_3$ )), 1.66 (s, 6H, 2x NC( $\text{CH}_3$ )), 1.60 (s, 6H, 2x NC( $\text{CH}_3$ )), 1.44 (d,  $^3J_{\text{H-H}} = 7.0$  Hz, 6H, (CH( $\text{CH}_3$ )<sub>2</sub>)), 1.43 (s, 6H, Xyl- $\text{CH}_3$ ), 1.23 (d,  $^3J_{\text{H-H}} = 6.7$  Hz, 6H, (CH( $\text{CH}_3$ )<sub>2</sub>)), 1.22 (d,  $^3J_{\text{H-H}} = 6.7$  Hz, 6H, (CH( $\text{CH}_3$ )<sub>2</sub>)), 1.21 (d,  $^3J_{\text{H-H}} = 6.8$  Hz, 6H, (CH( $\text{CH}_3$ )<sub>2</sub>)), 1.04 (d,  $^3J_{\text{H-H}} = 6.8$  Hz, 6H, (CH( $\text{CH}_3$ )<sub>2</sub>)), 0.92 (d,  $^3J_{\text{H-H}} = 6.7$  Hz, 6H, (CH( $\text{CH}_3$ )<sub>2</sub>)), 0.46 (d,  $^3J_{\text{H-H}} = 6.9$  Hz, 6H, (CH( $\text{CH}_3$ )<sub>2</sub>)), 0.40 (d,  $^3J_{\text{H-H}} = 6.7$  Hz, 6H, (CH( $\text{CH}_3$ )<sub>2</sub>)).

**$^{13}\text{C}$  NMR** ( $\text{C}_6\text{D}_6$ , 298 K, 101 MHz)  $\delta$ : 168.6 (2x CH{C(CH<sub>3</sub>)<sub>2</sub>}), 167.9 (2x CH{C(CH<sub>3</sub>)<sub>2</sub>}), 167.3 (2x CH{C(CH<sub>3</sub>)<sub>2</sub>}), 166.9 (2x CH{C(CH<sub>3</sub>)<sub>2</sub>}), 152.5 (Ar-C), 152.2 ( $\text{O}^{13}\text{C}^1\text{H}^1=\text{C}^2\text{H}^2\text{NXyl}$ ), 147.1 (Ar-C), 146.1 (Ar-C), 143.4 (Ar-C), 143.0 (Ar-C), 142.4 (Ar-C), 142.3 (Ar-C), 134.2 (Ar-C), 134.1 (Ar-C), 125.6 (Ar-CH), 125.5 (Ar-CH), 124.6 (Ar-CH), 124.4 (Ar-CH), 124.2 (Ar-CH), 123.6 (Ar-CH), 123.0 (Ar-CH), 102.9 ( $\text{O}^{13}\text{C}^1\text{H}^1=\text{C}^2\text{H}^2\text{NXyl}$ ), 93.5 (2x CH{C(CH<sub>3</sub>)<sub>2</sub>}), 92.4 (2x CH{C(CH<sub>3</sub>)<sub>2</sub>}), 29.2 (2x CH(CH<sub>3</sub>)<sub>2</sub>), 28.4 (2x CH(CH<sub>3</sub>)<sub>2</sub>), 27.9 (2x CH(CH<sub>3</sub>)<sub>2</sub>), 27.6 (2x CH(CH<sub>3</sub>)<sub>2</sub>), 26.6 (2x CH(CH<sub>3</sub>)<sub>2</sub>), 25.5 (2x CH(CH<sub>3</sub>)<sub>2</sub>), 25.4 (2x CH(CH<sub>3</sub>)<sub>2</sub>), 25.3 (2x CH(CH<sub>3</sub>)<sub>2</sub>), 24.9 (2x CH(CH<sub>3</sub>)<sub>2</sub>), 24.4 (2x NC(CH<sub>3</sub>)), 24.3 (2x NC(CH<sub>3</sub>)), 24.2 (2x CH(CH<sub>3</sub>)<sub>2</sub>), 22.6 (2x CH(CH<sub>3</sub>)<sub>2</sub>), 22.0 (2x CH(CH<sub>3</sub>)<sub>2</sub>), 20.5 (2x NC(CH<sub>3</sub>)), 19.8 (2x NC(CH<sub>3</sub>)), 19.7 (2x Xyl- $\text{CH}_3$ ), 17.80 (2x Xyl- $\text{CH}_3$ ). Some ArC resonances are overlapping and cannot be observed.

### Preparation of 3-THF<sub>2</sub>

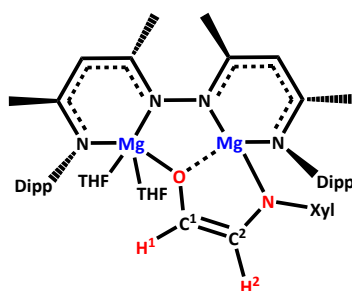

In a glovebox, **3**<sub>2</sub> (40.0 mg, 0.028 mmol, 1 eq) was dissolved in d<sub>8</sub>-THF (0.8 mL) and transferred to a J. Young NMR tube. The reaction mixture was stored at 25 °C for 1 hour. A <sup>1</sup>H NMR spectrum was taken at this time point and showed the full conversion of **3**<sub>2</sub> to **3-THF**<sub>2</sub>. The J. Young NMR tube was returned to the glovebox, the solvent was removed under vacuum and the crude dissolved in 1 mL of a THF/n-pentane (1:2 v: v) mixture. The solution was filtered into a 4 mL vial and then placed in the glovebox freezer (−35 °C) for about 3 days. Bright yellow crystals (**3-THF**<sub>2</sub>) were successfully obtained. The filtrated crystals were washed with cold n-pentane (3 x 1mL) and then dried in vacuo. **Yield: 14 mg**, 0.017 mmol, 60%.

<sup>1</sup>H NMR (d<sub>8</sub>-THF, 298 K, 400 MHz) δ: 7.12 – 7.03 (m, 3H, Ar-**H**), 6.99 (d, <sup>3</sup>J<sub>H-H</sub> = 7.5 Hz, 1H, Ar-**H**), 6.92 (m, 1H, Ar-**H**), 6.79 (d, <sup>3</sup>J<sub>H-H</sub> = 7.5 Hz, 1H, Ar-**H**), 6.60 (d, <sup>3</sup>J<sub>H-H</sub> = 7.3 Hz, 2H, NXyl-**H**), 6.28 (t, <sup>3</sup>J<sub>H-H</sub> = 7.3 Hz, 1H, NXyl-**H**), 5.42 (d, <sup>3</sup>J<sub>H-H</sub> = 3.4 Hz, 1H, OC<sup>1</sup>H<sup>1</sup>=C<sup>2</sup>H<sup>2</sup>NXyl), 5.32 (d, <sup>3</sup>J<sub>H-H</sub> = 3.3 Hz, 1H, OC<sup>1</sup>H<sup>1</sup>=C<sup>2</sup>H<sup>2</sup>NXyl), 4.52 (s, 1H), 3.35 (hept, <sup>3</sup>J<sub>H-H</sub> = 6.6 Hz, 1H, CH(CH<sub>3</sub>)<sub>2</sub>), 3.30 (hept, <sup>3</sup>J<sub>H-H</sub> = 6.6 Hz, 1H, CH(CH<sub>3</sub>)<sub>2</sub>), 3.18 (hept, <sup>3</sup>J<sub>H-H</sub> = 6.5 Hz, 1H, CH(CH<sub>3</sub>)<sub>2</sub>), 2.70 (hept, <sup>3</sup>J<sub>H-H</sub> = 6.5 Hz, 1H, CH(CH<sub>3</sub>)<sub>2</sub>), 1.96 (s, 3H, Xyl-CH<sub>3</sub>), 1.91 (s, 3H, Xyl-CH<sub>3</sub>), 1.54 (d, <sup>3</sup>J<sub>H-H</sub> = 7.0 Hz, 6H, (CH(CH<sub>3</sub>)<sub>2</sub>)), 1.23 (d, <sup>3</sup>J<sub>H-H</sub> = 6.7 Hz, 6H, NC(CH<sub>3</sub>)), 1.20 (d, <sup>3</sup>J<sub>H-H</sub> = 6.7 Hz, 6H, (CH(CH<sub>3</sub>)<sub>2</sub>)), 1.11 (d, <sup>3</sup>J<sub>H-H</sub> = 6.8 Hz, 6H, (CH(CH<sub>3</sub>)<sub>2</sub>)), 1.02 (d, <sup>3</sup>J<sub>H-H</sub> = 6.7 Hz, 6H, (CH(CH<sub>3</sub>)<sub>2</sub>)), 0.96 (d, <sup>3</sup>J<sub>H-H</sub> = 6.8 Hz, 6H, (CH(CH<sub>3</sub>)<sub>2</sub>)).

<sup>13</sup>C NMR (d<sub>8</sub>-THF, 298 K, 101 MHz) δ: 165.6 (CH{C(CH<sub>3</sub>)<sub>2</sub>}), 165.2 (CH{C(CH<sub>3</sub>)<sub>2</sub>}), 164.9 (CH{C(CH<sub>3</sub>)<sub>2</sub>}), 164.6 (CH{C(CH<sub>3</sub>)<sub>2</sub>}), 155.9 (OC<sup>1</sup>H<sup>1</sup>=C<sup>2</sup>H<sup>2</sup>NXyl), 149.5 (Ar-C), 143.7 (Ar-C), 142.9 (Ar-C), 142.5 (Ar-C), 141.1 (Ar-C), 131.1 (Ar-C), 128.8 (Ar-C), 127.1 (Ar-CH), 124.2 (Ar-CH), 123.8 (Ar-CH), 123.4 (Ar-CH), 123.1 (Ar-CH), 123.0 (Ar-CH), 122.4 (Ar-CH), 118.5 (Ar-CH), 116.8 (OC<sup>1</sup>H<sup>1</sup>=C<sup>2</sup>H<sup>2</sup>NXyl), 90.6 (CH{C(CH<sub>3</sub>)<sub>2</sub>}), 89.9 (CH{C(CH<sub>3</sub>)<sub>2</sub>}), 28.1 (CH(CH<sub>3</sub>)<sub>2</sub>), 28.0 (CH(CH<sub>3</sub>)<sub>2</sub>), 27.9 (CH(CH<sub>3</sub>)<sub>2</sub>), 27.2 (CH(CH<sub>3</sub>)<sub>2</sub>), 23.3 (2x NC(CH<sub>3</sub>)), 23.2 (2x NC(CH<sub>3</sub>)), 22.2 (2x CH(CH<sub>3</sub>)<sub>2</sub>), 19.4 (2x CH(CH<sub>3</sub>)<sub>2</sub>), 19.2 (Xyl-CH<sub>3</sub>). Some ArC resonances are overlapping and cannot be observed.

## Preparation of 2c

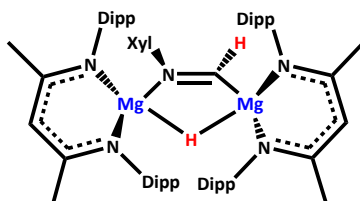

In a glovebox, (<sup>Dipp</sup>BDIMgH)<sub>2</sub> (20.0 mg, 0.023 mmol, 1 eq) and 2-isocyano-1,3-dimethylbenzene (3.0 mg, 0.023 mmol, 1 eq) were dissolved in C<sub>6</sub>D<sub>6</sub> (0.6 mL) and transferred to a J. Young NMR tube. The reaction mixture was heated at 60 °C for 14 hours. A <sup>1</sup>H NMR spectrum was taken at this time point and showed the full conversion of (<sup>Dipp</sup>BDIMgH)<sub>2</sub> to **2c**. The J. Young NMR tube was returned to the glovebox, the solvent was removed under vacuum and the crude dissolved in 1 mL of a Et<sub>2</sub>O/n-pentane (1:1 v: v) mixture. The solution was filtered into a 4 mL vial and then placed in the glovebox freezer (−35 °C) for about 2 days. Colourless crystals (**5**) were successfully obtained. The filtrated crystals were washed with cold n-pentane (3 x 1mL) and then dried in vacuo. **Yield: 9 mg**, 0.009 mmol, 40%.

<sup>1</sup>H NMR (C<sub>6</sub>D<sub>6</sub>, 298 K, 400 MHz) δ: 9.07 (d, <sup>3</sup>J<sub>H-H</sub> = 2.3 Hz, 1H, CH=N<sub>Xyl</sub>), 7.16 – 7.11 (m, 4H, ArH), 7.28 (t, <sup>3</sup>J<sub>H-H</sub> = 6.8 Hz, 1H, ArH), 7.23 (t, <sup>3</sup>J<sub>H-H</sub> = 6.8 Hz, 1H, ArH), 7.05 (t, <sup>3</sup>J<sub>H-H</sub> = 7.4 Hz, 1H, ArH), 6.99 (d, <sup>3</sup>J<sub>H-H</sub> = 7.4 Hz, 1H, ArH), 6.92 (dd, <sup>3</sup>J<sub>H-H</sub> = 7.4, 1.9 Hz, 1H, ArH), 6.88 (dd, <sup>3</sup>J<sub>H-H</sub> = 7.4, 1.9 Hz, 1H, ArH), 6.73 (t, <sup>3</sup>J<sub>H-H</sub> = 7.4 Hz, 1H, ArH), 6.70 (t, <sup>3</sup>J<sub>H-H</sub> = 7.4 Hz, 1H, ArH), 6.64 – 6.54 (m, 3H, ArH), 4.86 (s, 1H, CH{C(CH<sub>3</sub>)<sub>2</sub>}), 4.80 (s, 1H, CH{C(CH<sub>3</sub>)<sub>2</sub>}), 3.81 (hept, <sup>3</sup>J<sub>H-H</sub> = 6.8 Hz, 1H, CH(CH<sub>3</sub>)<sub>2</sub>), 3.69 (hept, <sup>3</sup>J<sub>H-H</sub> = 6.8 Hz, 1H, CH(CH<sub>3</sub>)<sub>2</sub>), 3.67 (hept, <sup>3</sup>J<sub>H-H</sub> = 6.8 Hz, 1H, CH(CH<sub>3</sub>)<sub>2</sub>), 3.54 (d, <sup>3</sup>J<sub>H-H</sub> = 2.3 Hz, 1H, Mg-H-Mg), 3.39 (hept, <sup>3</sup>J<sub>H-H</sub> = 6.9 Hz, 1H, CH(CH<sub>3</sub>)<sub>2</sub>), 3.13 (hept, <sup>3</sup>J<sub>H-H</sub> = 6.8 Hz, 1H, CH(CH<sub>3</sub>)<sub>2</sub>), 3.00 (hept, <sup>3</sup>J<sub>H-H</sub> = 6.7 Hz, 1H, CH(CH<sub>3</sub>)<sub>2</sub>), 2.91 (hept, <sup>3</sup>J<sub>H-H</sub> = 6.9 Hz, 1H, CH(CH<sub>3</sub>)<sub>2</sub>), 2.85 (hept, <sup>3</sup>J<sub>H-H</sub> = 6.9 Hz, 1H, CH(CH<sub>3</sub>)<sub>2</sub>), 1.67 (s, 6H, NC(CH<sub>3</sub>)), 1.65 (d, <sup>3</sup>J<sub>H-H</sub> = 6.8 Hz, 3H, CH(CH<sub>3</sub>)(CH<sub>3</sub>)), 1.56 (s, 3H, NC(CH<sub>3</sub>)), 1.54 (d, <sup>3</sup>J<sub>H-H</sub> = 6.8 Hz, 3H, CH(CH<sub>3</sub>)(CH<sub>3</sub>)), 1.45 (s, 3H, NC(CH<sub>3</sub>)), 1.42 (d, <sup>3</sup>J<sub>H-H</sub> = 6.9 Hz, 3H, CH(CH<sub>3</sub>)(CH<sub>3</sub>)), 1.40 (d, <sup>3</sup>J<sub>H-H</sub> = 6.9 Hz, 3H, CH(CH<sub>3</sub>)(CH<sub>3</sub>)), 1.27 (d, <sup>3</sup>J<sub>H-H</sub> = 6.7 Hz, 3H, CH(CH<sub>3</sub>)(CH<sub>3</sub>)), 1.27 (d, <sup>3</sup>J<sub>H-H</sub> = 6.7 Hz, 6H, CH(CH<sub>3</sub>)(CH<sub>3</sub>)), 1.23 (d, <sup>3</sup>J<sub>H-H</sub> = 6.7 Hz, 6H, CH(CH<sub>3</sub>)(CH<sub>3</sub>)), 1.18 (s, 3H, NXyl-CH<sub>3</sub>), 1.15 (d, <sup>3</sup>J<sub>H-H</sub> = 6.9 Hz, 3H, CH(CH<sub>3</sub>)(CH<sub>3</sub>)), 1.06 (d, <sup>3</sup>J<sub>H-H</sub> = 6.8 Hz, 3H, CH(CH<sub>3</sub>)(CH<sub>3</sub>)), 1.05 (d, <sup>3</sup>J<sub>H-H</sub> = 6.8 Hz, 3H, CH(CH<sub>3</sub>)(CH<sub>3</sub>)), 0.97 (d, <sup>3</sup>J<sub>H-H</sub> = 6.8 Hz, 3H, CH(CH<sub>3</sub>)(CH<sub>3</sub>)), 0.87 (s, 3H, NXyl-CH<sub>3</sub>), 0.64 (d, <sup>3</sup>J<sub>H-H</sub> = 6.7 Hz, 3H, CH(CH<sub>3</sub>)(CH<sub>3</sub>)), 0.37 (d, <sup>3</sup>J<sub>H-H</sub> = 6.8 Hz, 3H, CH(CH<sub>3</sub>)(CH<sub>3</sub>)), 0.34 (d, <sup>3</sup>J<sub>H-H</sub> = 6.8 Hz, 3H, CH(CH<sub>3</sub>)(CH<sub>3</sub>)).

<sup>13</sup>C NMR (C<sub>6</sub>D<sub>6</sub>, 298 K, 101 MHz) δ: 169.0 (CH{C(CH<sub>3</sub>)<sub>2</sub>}), 168.9 (CH{C(CH<sub>3</sub>)<sub>2</sub>}), 168.6 (CH{C(CH<sub>3</sub>)<sub>2</sub>}), 168.1 (CH{C(CH<sub>3</sub>)<sub>2</sub>}), 157.1 (CH=N<sub>Xyl</sub>), 147.0 (Ar-C), 146.8 (Ar-C), 146.7 (Ar-C), 144.1 (Ar-C), 143.6 (Ar-C), 143.2 (Ar-C), 142.9 (Ar-C), 142.6 (Ar-C), 142.3 (Ar-C), 141.9 (Ar-C), 141.1 (Ar-C), 129.2 (Ar-CH), 128.6 (Ar-CH), 127.0 (Ar-CH), 125.6 (Ar-CH), 125.5 (Ar-CH), 125.2 (Ar-CH), 124.9 (Ar-CH), 124.5 (Ar-CH), 124.4 (Ar-CH), 124.2 (Ar-CH), 124.1 (Ar-CH), 123.6 (Ar-CH), 123.5 (Ar-CH), 123.4 (Ar-CH), 123.2 (Ar-CH), 96.0 (CH{C(CH<sub>3</sub>)<sub>2</sub>}), 95.0 (CH{C(CH<sub>3</sub>)<sub>2</sub>}), 30.6

(CH(CH<sub>3</sub>)(CH<sub>3</sub>)), 29.5 (CH(CH<sub>3</sub>)(CH<sub>3</sub>)), 29.1 (CH(CH<sub>3</sub>)(CH<sub>3</sub>)), 28.2 (CH(CH<sub>3</sub>)(CH<sub>3</sub>)), 28.1  
(CH(CH<sub>3</sub>)(CH<sub>3</sub>)), 27.8 (CH(CH<sub>3</sub>)(CH<sub>3</sub>)), 27.5 (CH(CH<sub>3</sub>)(CH<sub>3</sub>)), 27.1 (CH(CH<sub>3</sub>)(CH<sub>3</sub>)), 27.0  
(CH(CH<sub>3</sub>)(CH<sub>3</sub>)), 26.7 (CH(CH<sub>3</sub>)(CH<sub>3</sub>)), 25.6 (CH(CH<sub>3</sub>)(CH<sub>3</sub>)), 25.2 (CH(CH<sub>3</sub>)(CH<sub>3</sub>)), 25.1  
(CH(CH<sub>3</sub>)(CH<sub>3</sub>)), 25.1 (CH(CH<sub>3</sub>)(CH<sub>3</sub>)), 25.0 (CH(CH<sub>3</sub>)(CH<sub>3</sub>)), 24.9 (CH(CH<sub>3</sub>)(CH<sub>3</sub>)), 24.8 (NC(CH<sub>3</sub>)),  
24.7 (2x NC(CH<sub>3</sub>)), 24.5 (NC(CH<sub>3</sub>)), 24.4 (CH(CH<sub>3</sub>)(CH<sub>3</sub>)), 24.3 (CH(CH<sub>3</sub>)(CH<sub>3</sub>)), 24.2  
(CH(CH<sub>3</sub>)(CH<sub>3</sub>)), 22.9 (CH(CH<sub>3</sub>)(CH<sub>3</sub>)), 22.8 (CH(CH<sub>3</sub>)(CH<sub>3</sub>)), 22.7 (CH(CH<sub>3</sub>)(CH<sub>3</sub>)), 22.5  
(CH(CH<sub>3</sub>)(CH<sub>3</sub>)), 22.2 (CH(CH<sub>3</sub>)(CH<sub>3</sub>)), 21.2 (NXyl-CH<sub>3</sub>), 17.0 (NXyl-CH<sub>3</sub>). Some ArC resonances  
are overlapping and cannot be observed.

**Anal. Calc. (C<sub>67</sub>H<sub>93</sub>Mg<sub>2</sub>N<sub>5</sub>):** C, 79.12; H, 9.22; N, 6.89. Found: C, 79.71; H, 9.26; N, 7.32.

### Preparation of 4a

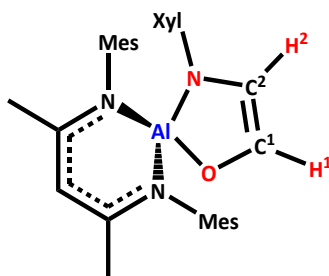

In a glovebox, **3<sub>2</sub>** (40.0 mg, 0.028 mmol, 1 eq) and <sup>Mes</sup>BDIAICl<sub>2</sub> (23.9 mg, 0.056 mmol, 2 eq) were dissolved in C<sub>6</sub>D<sub>6</sub> (1.0 mL) and transferred to a J. Young NMR tube. The reaction mixture was heated to 100 °C for 48 hours. A <sup>1</sup>H NMR spectrum was taken at this time point and showed the full conversion of **3<sub>2</sub>** to **4a**. The J. Young NMR tube was returned to the glovebox, the reaction mixture was decanted into a vial, the solvent was removed under vacuum and the crude mixture dissolved in 1 mL of a Et<sub>2</sub>O/n-pentane (1:1 v: v) mixture. The solution was filtered into a 4 mL vial and then placed in the glovebox freezer (–35 °C) for 3 days. Bright red crystals (**4a**) were successfully obtained. The filtrated crystals were washed with cold n-pentane (3 x 1mL) and then dried in vacuo. **Yield: 8 mg**, 0.008 mmol, 60%.

**<sup>1</sup>H NMR** (C<sub>6</sub>D<sub>6</sub>, 298 K, 400 MHz) δ: 6.96 (dd, <sup>3</sup>J<sub>H-H</sub> = 7.4, 0.7 Hz, 2H, NXyl-**H**), 6.89 (dd, <sup>3</sup>J<sub>H-H</sub> = 6.5, 1.4Hz, 1H, NXyl-**H**), 6.74 (d, <sup>3</sup>J<sub>H-H</sub> = 7.0 Hz, 2H, NMes-**H**), 6.64 (d, <sup>3</sup>J<sub>H-H</sub> = 7.0 Hz, 2H, NMes-**H**), 6.41 (d, <sup>3</sup>J<sub>H-H</sub> = 2.7 Hz, 1H, OC<sup>1</sup>H<sup>1</sup>=C<sup>2</sup>H<sup>2</sup>NXyl), 5.69 (d, <sup>3</sup>J<sub>H-H</sub> = 2.7 Hz, 1H, OC<sup>1</sup>H<sup>1</sup>=C<sup>2</sup>H<sup>2</sup>NXyl), 5.00 (s, 1H, CH{C(CH<sub>3</sub>)<sub>2</sub>}), 2.46 (s, 6H, NMes-CH<sub>3</sub>), 2.10 (s, 6H, NMes-CH<sub>3</sub>), 1.88 (s, 6H, NXyl-CH<sub>3</sub>), 1.81 (s, 6H, NMes-CH<sub>3</sub>), 1.43 (s, 6H, (NC(CH<sub>3</sub>))).

**<sup>13</sup>C NMR** (C<sub>6</sub>D<sub>6</sub>, 298 K, 101 MHz) δ: 171.2 (NC(CH<sub>3</sub>)), 148.7 (Ar-C), 140.4 (Ar-C), 136.0 (Ar-C), 134.2 (Ar-C), 134.2 (Ar-C), 130.1 (Ar-CH), 129.6 (Ar-CH), 128.4 (OC<sup>1</sup>H<sup>1</sup>=C<sup>2</sup>H<sup>2</sup>NXyl), 123.9 (OC<sup>2</sup>H<sup>1</sup>=C<sup>2</sup>H<sup>2</sup>NXyl), 121.8 (Ar-CH), 99.1 (CH{C(CH<sub>3</sub>)<sub>2</sub>}), 22.6 (NC(CH<sub>3</sub>)), 20.8 (NMes-CH<sub>3</sub>), 19.4 (NXyl-CH<sub>3</sub>), 18.9 (NMes-CH<sub>3</sub>), 18.3 (NMes-CH<sub>3</sub>). Some ArCH resonances are overlapping and cannot be observed.

**IR (ATR, cm<sup>-1</sup>):** 2953(s), 2916(s), 2856(s), 2732(s), 1608(w), 1584(w), 1530(s), 1478(w), 1466(m), 1438(w), 1371(s), 1342(w), 1297(w), 1273(s), 1239(s).

**Anal. Calc. (C<sub>31</sub>H<sub>38</sub>AlN<sub>3</sub>O):** C, 75.98; H, 7.73; N, 8.05. Found: C, 69.09; H, 7.37; N, 7.03. Due to the highly sensitive nature of this compound CHN results do not match the expected values.

### Preparation of 4b

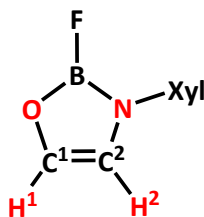

In a glovebox, **4a** (40.0 mg, 0.066 mmol, 1 eq) and  $\text{BF}_3\text{-Et}_2\text{O}$  (9.8 mg, 0.069 mmol, 1.05 eq) were dissolved in  $\text{C}_6\text{D}_6$  (1.0 mL) and transferred to a J. Young NMR tube with ferrocene as the internal standard. The reaction mixture was stored at 25 °C for 2 hours. Quantitative  $^1\text{H}$  NMR spectrum spectroscopy showed the full conversion of **4a** to **4b**. **NMR Yield:** 63%.

$^1\text{H}$  NMR ( $\text{C}_6\text{D}_6$ , 298 K, 400 MHz)  $\delta$ : 6.91 (dd,  $^3J_{\text{H-H}} = 8.4$ , 6.5 Hz, 1H, NXyl-**H**), 6.84 (d,  $^3J_{\text{H-H}} = 7.2$  Hz, 2H, NXyl-**H**), 6.32 (bs, 1H,  $\text{OC}^1\text{H}^1=\text{C}^2\text{H}^2\text{NXyl}$ ), 5.67 (bs, 1H,  $\text{OC}^1\text{H}^1=\text{C}^2\text{H}^2\text{NXyl}$ ), 1.94 (s, 6H, NXyl- $\text{CH}_3$ ).

$^{13}\text{C}$  NMR ( $\text{C}_6\text{D}_6$ , 298 K, 101 MHz)  $\delta$ : 136.2 (Ar-**C**), 129.8 (Ar-**CH**), 129.6 (Ar-**CH**), 128.5 ( $\text{OC}^1\text{H}^1=\text{C}^2\text{H}^2\text{NXyl}$ ), 128.3 (Ar-**C**), 121.0 ( $\text{OC}^1\text{H}^1=\text{C}^2\text{H}^2\text{NXyl}$ ), 20.5 (NXyl- $\text{CH}_3$ ).

$^{11}\text{B}$  NMR ( $\text{C}_6\text{D}_6$ , 298 K, 128.0 MHz)  $\delta$  21.41 (s)

$^{19}\text{F}$  NMR ( $\text{C}_6\text{D}_6$ , 298 K, 376.5 MHz)  $\delta$  -156.50 (d,  $J_{\text{B-F}} = 28.8$  Hz).



## 2.2 Reaction of 2c with CO

In a glovebox, **2c** (9.0 mg, 0.009 mmol, 1 eq) was dissolved in  $C_6D_6$  (0.6 mL) and transferred to a J. Young NMR tube. The NMR tube was frozen at  $-78\text{ }^\circ\text{C}$  and evacuated, CO gas ( $\sim 1.5$  bar, about 0.135 mmol, 3.78 mg) was introduced into the NMR tube and the reaction mixture was kept at  $25\text{ }^\circ\text{C}$  for 14 hours. A  $^1\text{H}$  NMR spectrum was taken at this time point and showed no reaction. The reaction was then heated to  $60\text{ }^\circ\text{C}$  for 30 hours. A  $^1\text{H}$  NMR spectrum was taken at this time point and showed all **2c** was consumed, forming a complex mixture of products with no evidence for formation of an ethene amidolate.

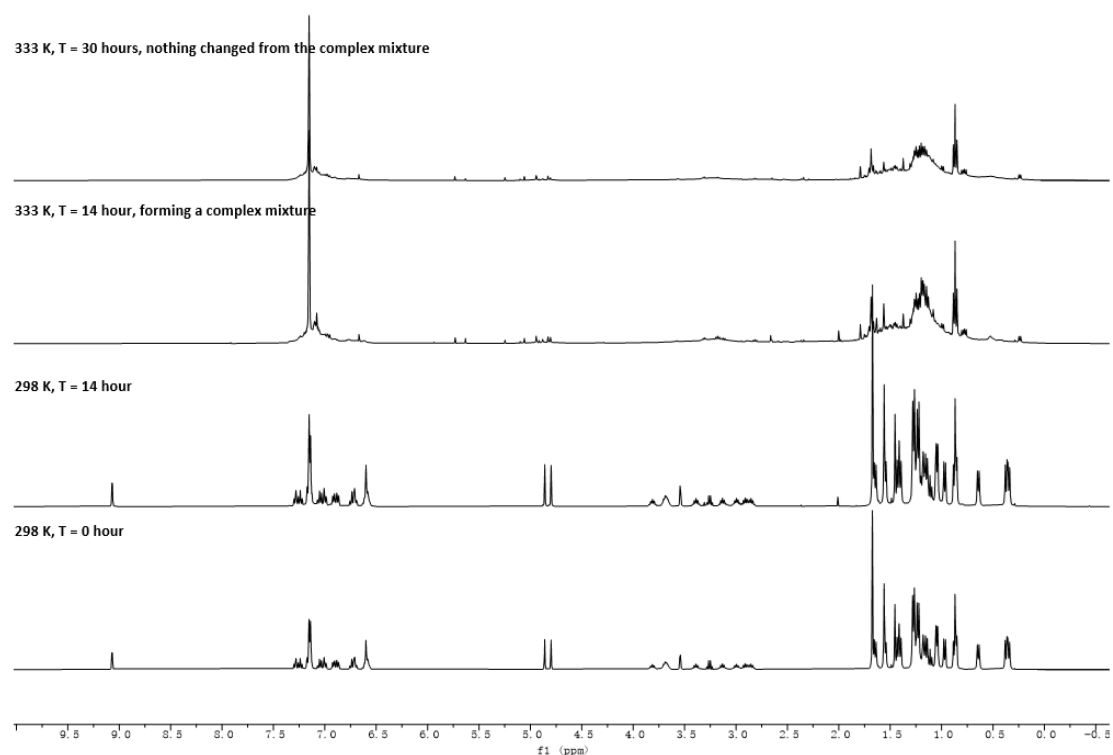

**Figure S3.** Reaction of **2c** with CO followed by  $^1\text{H}$  NMR spectroscopy

### 2.3 Thermolysis of 2a in absence of CO

In a glovebox, **2a** (5.0 mg, 0.004 mmol) was dissolved in  $C_6D_6$  (0.5 mL) and transferred to a J. Young NMR tube. The reaction mixture was heated to 60 °C for 3 hours and then up to 80 °C for 15 hours. The reaction was monitored by  $^1H$  NMR spectroscopy. **2a** was slowly consumed, forming a complex mixture of products. No clear evidence can prove the formation process of azamethylene intermediate.

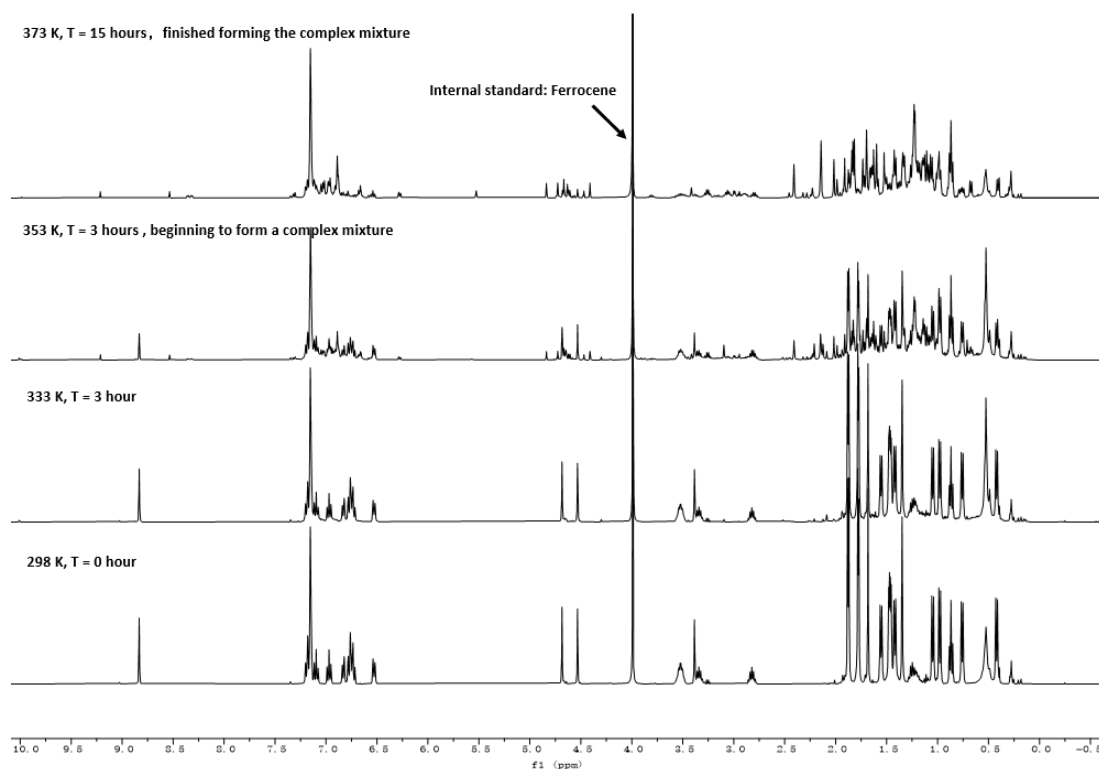

**Figure S4.** Thermolysis of **2a** followed by  $^1H$  NMR spectroscopy

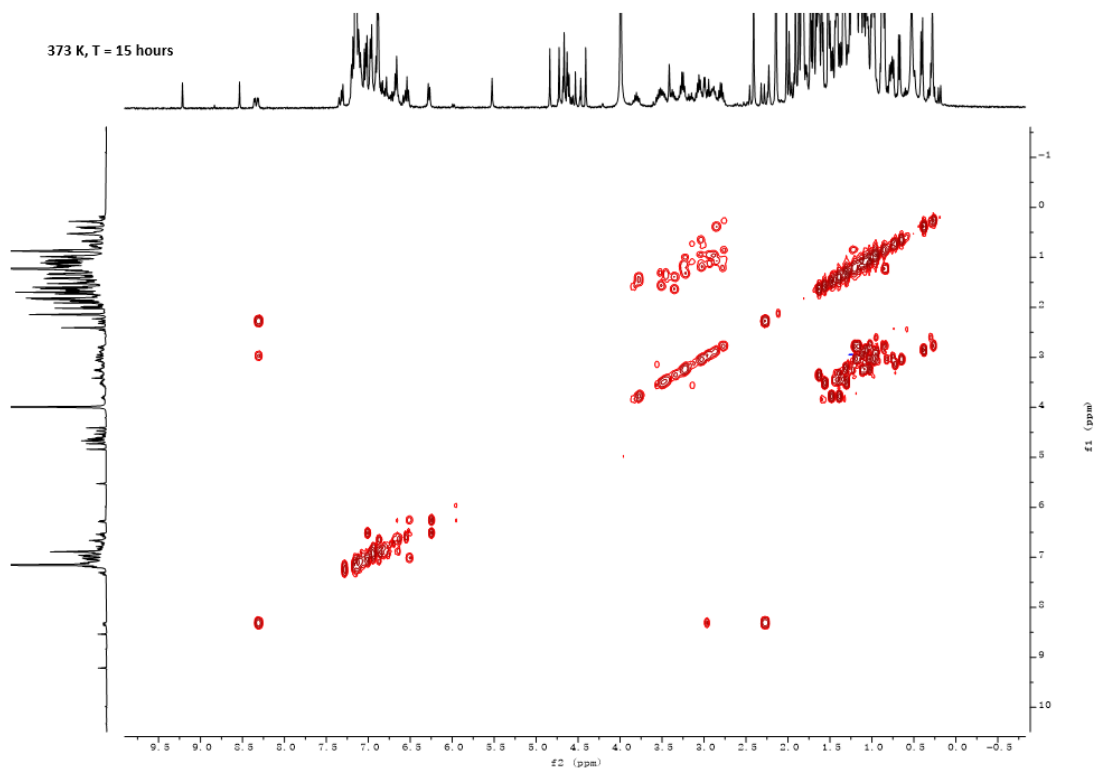

**Figure S5.** COSY NMR of **2a** after heating to 80 °C for 15 hours

## 2.4 Attempted Reaction of 2a with 2-isocyano-1,3-dimethylbenzene

In a glovebox, **2a** (10.0 mg, 0.008 mmol, 1 eq) and 2-isocyano-1,3-dimethylbenzene (2.0 mg, 0.016 mmol, 2 eq) were dissolved in C<sub>6</sub>D<sub>6</sub> (0.6 mL) and transferred to a J. Young NMR tube. The reaction mixture was heated to 60 °C for 24 hours and then up to 100 °C for 12 hours. A <sup>1</sup>H NMR spectrum was taken at this time point and showed that all **2a** was consumed, forming a complex mixture of products with no evidence for formation of the ethene diamidolate.

373 K, T = 12 hours, the complex mixture was decomposed

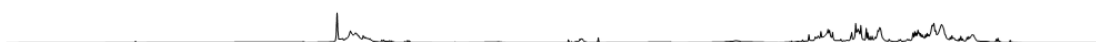

333 K, T = 24 hours, forming a complex mixture

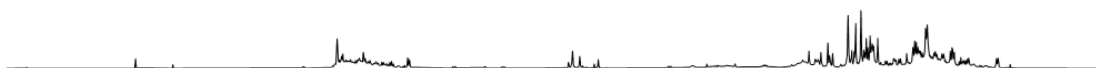

333 K, T = 1 hour

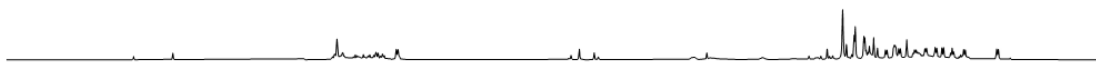

298 K, T = 0 hour

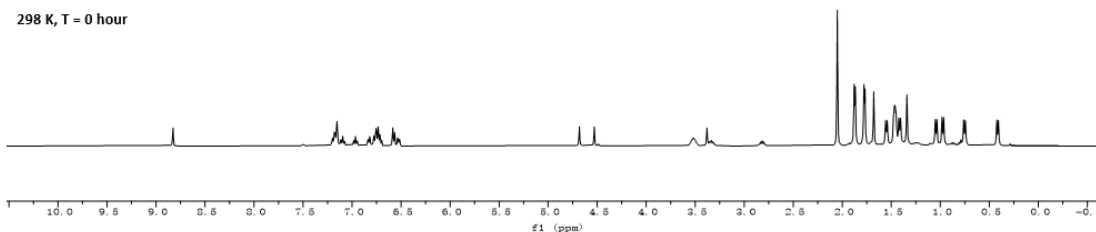

**Figure S6.** <sup>1</sup>H NMR of reaction of **2a** with 2-isocyano-1,3-dimethylbenzene

## 2.5 Preparation of $^{13}\text{C}$ Labelled Samples

In order to unequivocally assign chemical shifts for the carbon environments, a  $^{13}\text{C}$  labelled sample of  $\mathbf{3}_2$ - $^{13}\text{C}$  was synthesized.

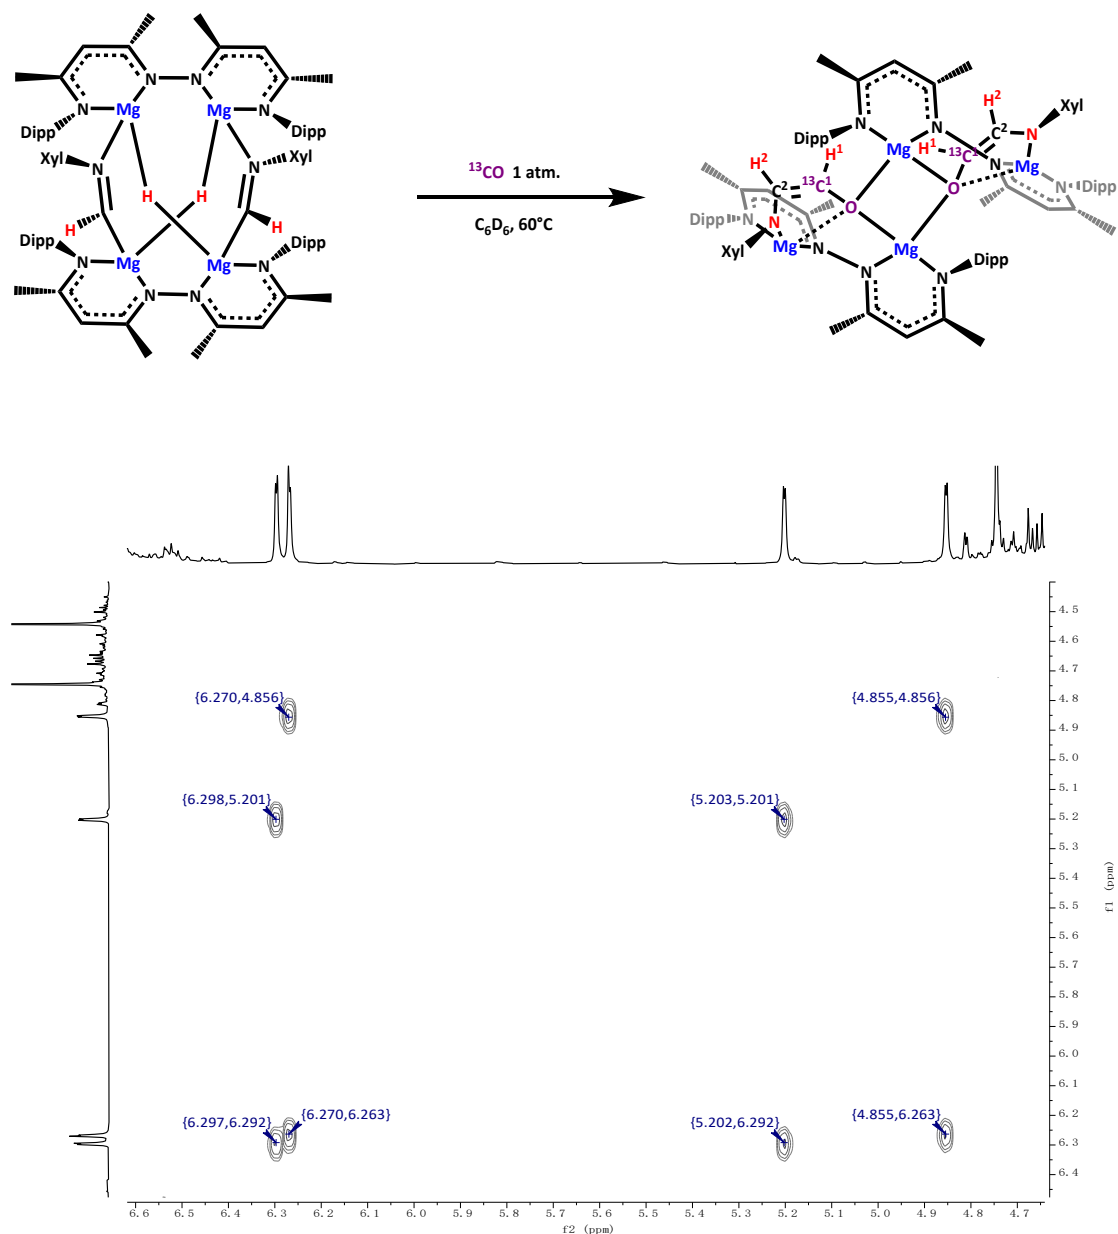

**Figure S7.**  $^1\text{H}$ - $^1\text{H}$  COSY spectrum of  $\mathbf{3}$ - $^{13}\text{C}$  with key  $^1\text{H}$  resonances associated with  $^{13}\text{C}^1$  and  $\text{C}^2$ .

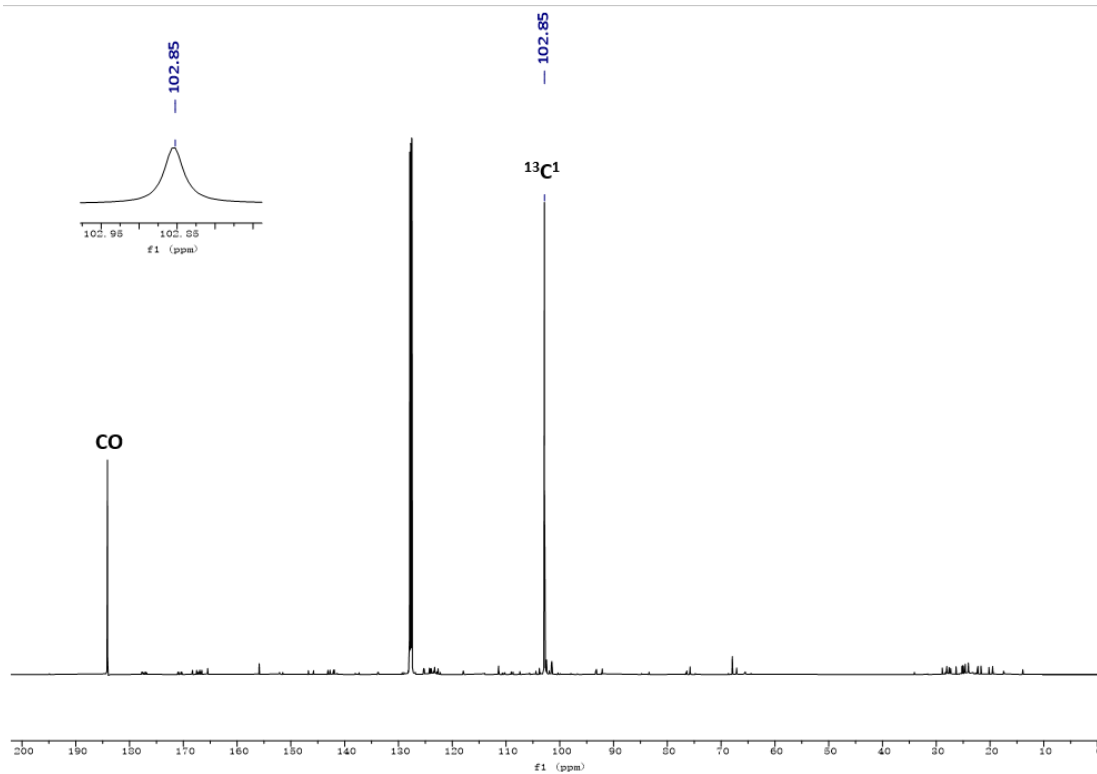

**Figure S8.**  $^{13}\text{C}\{^1\text{H}\}$  spectrum of  $3\text{-}^{13}\text{C}$  with key  $^{13}\text{C}$  resonances of  $^{13}\text{C}1$ .

## 2.6 DOSY Spectrum of **3**<sub>2</sub> and **3-THF**<sub>2</sub>

**Instruments:** DOSY spectrums were recorded on BRUKER 500 MHz machines, Si(SiMe<sub>3</sub>)<sub>4</sub> was used as internal standard (<sup>1</sup>H).<sup>[S4]</sup> All peaks are referenced against residual solvent and values are quoted in ppm. Data were processed using the using Dynamics Centre. The hydrodynamic radius was calculated by using Stokes-Einstein Equation.<sup>[S4]</sup>

DFT calculation also simulated the experimental results (The electronic energies of the optimised geometries and their volumes were calculated using the ωB97X-D functional with 6-311+G\*\* basis sets for all atoms with solvent corrections (PCM, benzene, ε = 2.2706).)

Dosy/Fit

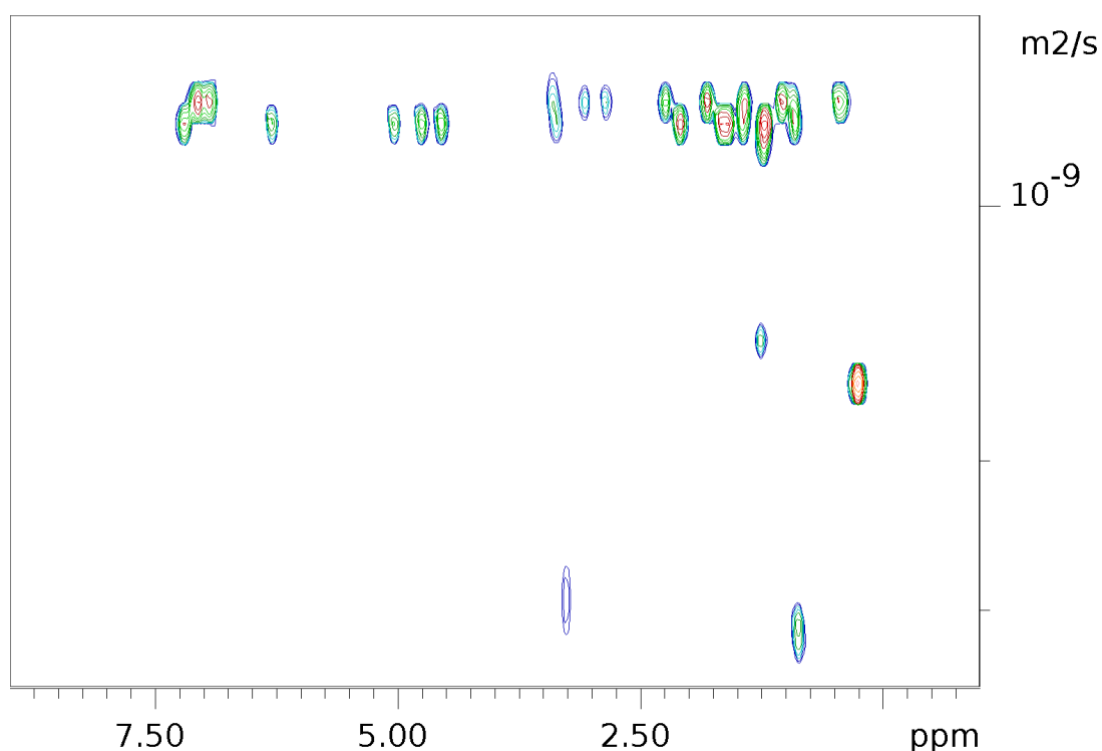

Figure S9. DOSY spectrum of **3**<sub>2</sub> in C<sub>6</sub>D<sub>6</sub>.

Compound diffusion coefficient is:  $7.77 \times 10^{-10}$  m<sup>2</sup>/s

Compound HD radius is: 9.3 Å

Compound HD radius (DFT calculation result) is: 8.8 Å

Dosy/Fit

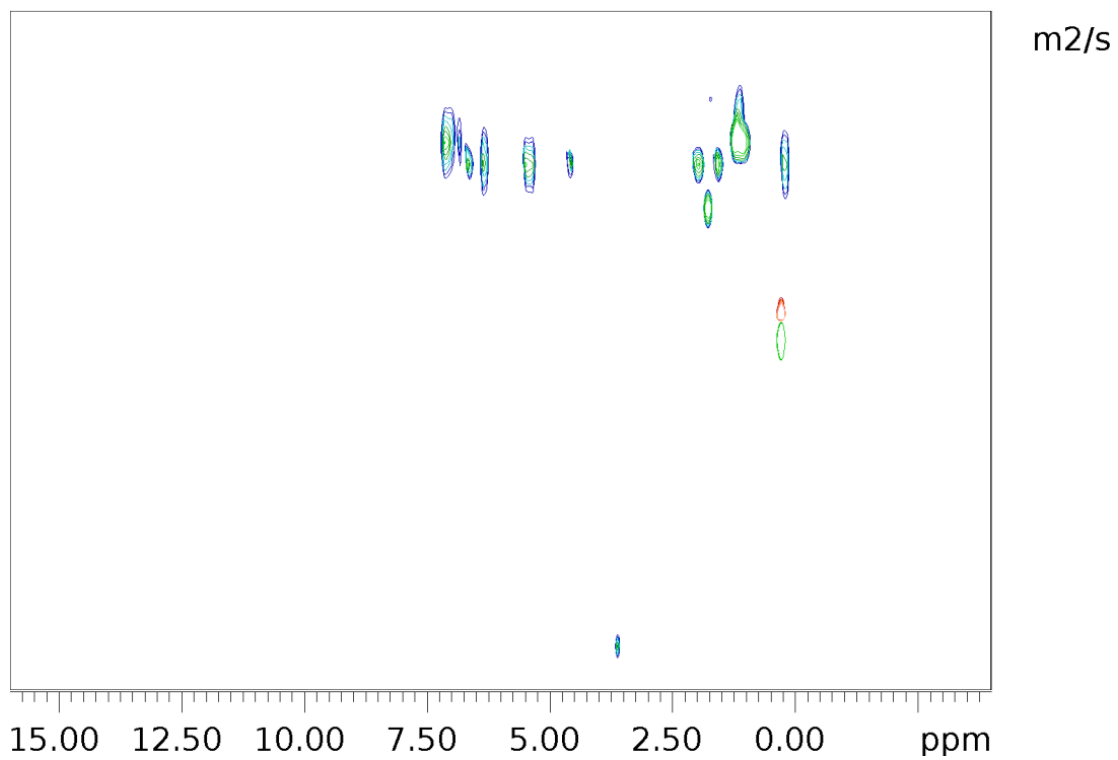

Figure S10. DOSY spectrum of **3-THF<sub>2</sub>** in d<sub>8</sub>-THF.

Compound diffusion coefficient is:  $1.13 \times 10^{-9} \text{ m}^2/\text{s}$

Compound HD radius is: 7.2 Å

Compound HD radius (DFT calculation result) is: 7.6 Å



### 3) Single Crystal X-ray Diffraction Data

| data                                                          | 2a                                                               | 2b                                                               | 2c                                                             | 3 <sub>2</sub>                                                                  |
|---------------------------------------------------------------|------------------------------------------------------------------|------------------------------------------------------------------|----------------------------------------------------------------|---------------------------------------------------------------------------------|
| formula                                                       | C <sub>86</sub> H <sub>118</sub> Mg <sub>4</sub> N <sub>10</sub> | C <sub>76</sub> H <sub>112</sub> Mg <sub>4</sub> N <sub>12</sub> | C <sub>67</sub> H <sub>93</sub> Mg <sub>2</sub> N <sub>5</sub> | C <sub>88</sub> H <sub>118</sub> Mg <sub>4</sub> N <sub>10</sub> O <sub>2</sub> |
| solvent                                                       | 1.5(C <sub>4</sub> H <sub>10</sub> O)                            | C <sub>6</sub> H <sub>6</sub>                                    | C <sub>4</sub> H <sub>10</sub> O                               | 4(C <sub>4</sub> H <sub>10</sub> O)                                             |
| formula weight                                                | 1500.32                                                          | 1369.12                                                          | 1091.20                                                        | 1741.63                                                                         |
| colour, habit                                                 | yellow blocks                                                    | yellow tablets                                                   | colourless tablets                                             | yellow blocks                                                                   |
| temperature / K                                               | 173                                                              | 173                                                              | 173                                                            | 173                                                                             |
| crystal system                                                | monoclinic                                                       | orthorhombi                                                      | triclinic                                                      | monoclinic                                                                      |
| space group                                                   | <i>P</i> 2 <sub>1</sub> / <i>c</i> (no. 14)                      | <i>Pbcn</i> (no. 60)                                             | <i>P</i> -1 (no. 2)                                            | <i>C</i> 2/ <i>c</i> (no. 15)                                                   |
| <i>a</i> / Å                                                  | 20.0772(2)                                                       | 15.69440(18)                                                     | 12.2454(3)                                                     | 23.1551(2)                                                                      |
| <i>b</i> / Å                                                  | 15.05708(15)                                                     | 30.4384(3)                                                       | 14.1302(4)                                                     | 13.13534(12)                                                                    |
| <i>c</i> / Å                                                  | 30.2204(3)                                                       | 17.51319(16)                                                     | 20.6959(5)                                                     | 33.9649(4)                                                                      |
| $\alpha$ / deg                                                | 90                                                               | 90                                                               | 78.593(2)                                                      | 90                                                                              |
| $\beta$ / deg                                                 | 93.6657(9)                                                       | 90                                                               | 85.703(2)                                                      | 93.0767(9)                                                                      |
| $\gamma$ / deg                                                | 90                                                               | 90                                                               | 73.328(3)                                                      | 90                                                                              |
| <i>V</i> / Å <sup>3</sup>                                     | 9117.04(15)                                                      | 8366.26(14)                                                      | 3362.09(17)                                                    | 10315.55(18)                                                                    |
| <i>Z</i>                                                      | 4                                                                | 4 [c]                                                            | 2                                                              | 4 [c]                                                                           |
| <i>D<sub>c</sub></i> / g cm <sup>-3</sup>                     | 1.093                                                            | 1.087                                                            | 1.078                                                          | 1.121                                                                           |
| radiation used                                                | Cu-K $\alpha$                                                    | Cu-K $\alpha$                                                    | Cu-K $\alpha$                                                  | Cu-K $\alpha$                                                                   |
| $\mu$ / mm <sup>-1</sup>                                      | 0.745                                                            | 0.763                                                            | 0.645                                                          | 0.754                                                                           |
| no. of unique reflns                                          |                                                                  |                                                                  |                                                                |                                                                                 |
| measured ( <i>R</i> <sub>int</sub> )                          | 17484                                                            | 8221                                                             | 13374                                                          | 10391                                                                           |
| obs, $ F_o  > 4\sigma( F_o )$                                 | 13517                                                            | 6818                                                             | 9573                                                           | 8324                                                                            |
| completeness (%) [a]                                          | 98.5                                                             | 99.7                                                             | 100                                                            | 100                                                                             |
| no. of variables                                              | 1055                                                             | 504                                                              | 740                                                            | 588                                                                             |
| <i>R</i> <sub>1</sub> (obs), <i>wR</i> <sub>2</sub> (all) [b] | 0.0454,                                                          | 0.0371,                                                          | 0.0523,                                                        | 0.0597,                                                                         |
| CCDC code                                                     | 2289252                                                          | 2308758                                                          | 2308759                                                        | 2308757                                                                         |

[a] Completeness to 0.84 Å resolution. [b]  $R_1 = \sum ||F_o| - |F_c|| / \sum |F_o|$ ;  $wR_2 = \{\sum [w(F_o^2 - F_c^2)^2] / \sum [w(F_o^2)]\}^{1/2}$ ;  $w^{-1} = \sigma^2(F_o^2) + (aP)^2 + bP$ . [c] The complex has crystallographic *C*<sub>2</sub> symmetry.

**Table S1.** Crystal Data, Data Collection and Refinement Parameters for the structures of **2a**, **2b**, **2c** and **3<sub>2</sub>**.

| data                                                                    | <b>3-THF<sub>2</sub></b>                                                      | <b>4a</b>                                          |
|-------------------------------------------------------------------------|-------------------------------------------------------------------------------|----------------------------------------------------|
| formula                                                                 | C <sub>52</sub> H <sub>75</sub> Mg <sub>2</sub> N <sub>5</sub> O <sub>3</sub> | C <sub>33</sub> H <sub>40</sub> AlN <sub>3</sub> O |
| solvent                                                                 | —                                                                             | 0.5(C <sub>5</sub> H <sub>12</sub> )               |
| formula weight                                                          | 866.79                                                                        | 557.73                                             |
| colour, habit                                                           | yellow blocks                                                                 | yellow platy shards                                |
| temperature / K                                                         | 173                                                                           | 173                                                |
| crystal system                                                          | triclinic                                                                     | monoclinic                                         |
| space group                                                             | <i>P</i> -1 (no. 2)                                                           | <i>P</i> 2 <sub>1</sub> / <i>c</i> (no. 14)        |
| <i>a</i> / Å                                                            | 9.2215(3)                                                                     | 17.9825(6)                                         |
| <i>b</i> / Å                                                            | 11.1028(4)                                                                    | 12.3081(4)                                         |
| <i>c</i> / Å                                                            | 27.4961(7)                                                                    | 14.6715(4)                                         |
| $\alpha$ / deg                                                          | 80.246(3)                                                                     | 90                                                 |
| $\beta$ / deg                                                           | 84.648(3)                                                                     | 95.560(3)                                          |
| $\gamma$ / deg                                                          | 67.366(3)                                                                     | 90                                                 |
| <i>V</i> / Å <sup>3</sup>                                               | 2559.58(16)                                                                   | 3231.97(17)                                        |
| <i>Z</i>                                                                | 2                                                                             | 4                                                  |
| <i>D</i> <sub>c</sub> / g cm <sup>-3</sup>                              | 1.125                                                                         | 1.146                                              |
| radiation used                                                          | Cu-K $\alpha$                                                                 | Cu-K $\alpha$                                      |
| $\mu$ / mm <sup>-1</sup>                                                | 0.760                                                                         | 0.775                                              |
| no. of unique reflns                                                    |                                                                               |                                                    |
| measured ( <i>R</i> <sub>int</sub> )                                    | 10104                                                                         | 6212 (0.0413)                                      |
| obs,   <i>F</i> <sub>o</sub>   > 4 $\sigma$ (  <i>F</i> <sub>o</sub>  ) | 7322                                                                          | 4201                                               |
| completeness (%) [a]                                                    | 99.7                                                                          | 98.8                                               |
| no. of variables                                                        | 590                                                                           | 356                                                |
| <i>R</i> <sub>1</sub> (obs), <i>wR</i> <sub>2</sub> (all) [b]           | 0.0513,                                                                       | 0.0526,                                            |
| CCDC code                                                               | 2313439                                                                       | 2328581                                            |

**Table S2.** Crystal Data, Data Collection and Refinement Parameters for the structures of **3-THF<sub>2</sub>** and **4a**.

Table S1 provides a summary of the crystallographic data for the structures of **2a**, **2b**, **2c**, **3**, **3-THF<sub>2</sub>** and **4a**. Data were collected using an Agilent Xcalibur PX Ultra A diffractometer, and the structures were solved and refined using the OLEX2,<sup>[S5]</sup> SHELXTL<sup>[S6]</sup> and SHELX-2013<sup>[S7]</sup> program systems. CCDC 2289252, 2308758, 2308759, 2308757, 2313439 and 2328581 respectively.

### The X-ray crystal structure of **2a**

The N81-bound 2,6-dimethylphenyl group and the O100-based included diethylether solvent molecule in the structure of **2a** were both found to be disordered, and in each case two orientations were identified, of *ca.* 82:18 and 70:30% occupancy respectively. The geometries of each pair of orientations were optimised, the thermal parameters of adjacent atoms were restrained to be similar, and only the non-hydrogen atoms of the major occupancy orientations were refined anisotropically (those of the minor occupancy orientations were refined isotropically). The O110-based included diethylether solvent molecule was found to be disordered across a centre of symmetry, and two unique orientations were identified of *ca.* 27 and 23% occupancy (with two further orientations of the same occupancies being generated by operation of the inversion centre). The geometries of the two unique orientations were optimised, the thermal parameters of adjacent atoms were restrained to be similar, and all of the atoms were refined isotropically. The two bridging hydride atoms were both located from  $\Delta F$  maps and refined freely.

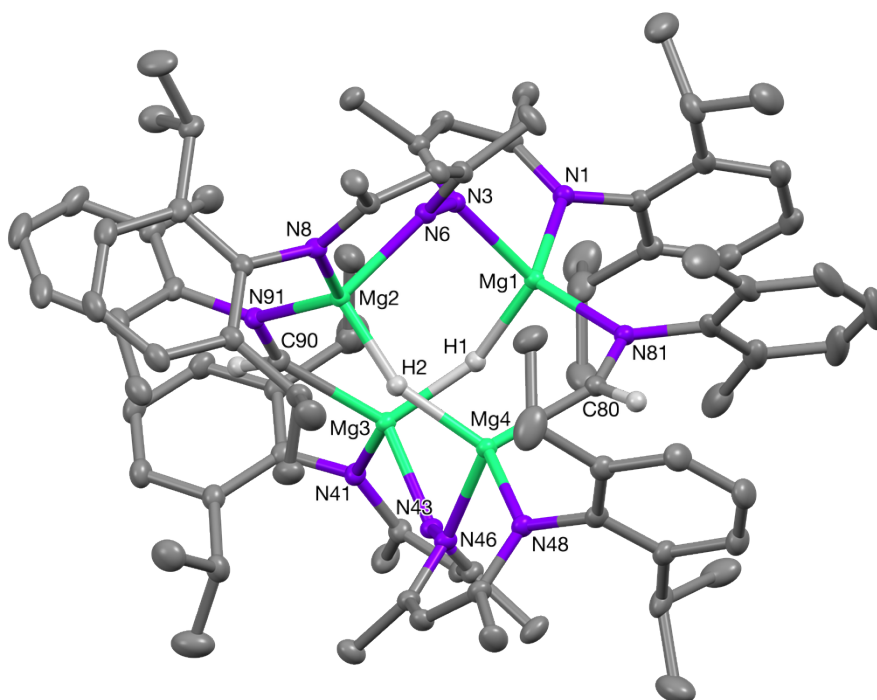

**Figure S11.** The crystal structure of **2a** (20% probability ellipsoids). Hydrogen atoms with the exception of hydride ligands have been omitted for clarity.

### The X-ray crystal structure of **2b**

The structure of **2b** was found to sit across a  $C_2$  axis that passes through the middle of both of the two  $C_2N_2Mg_2$  rings and bisects the  $Mg1\cdots Mg1A$  and  $Mg2\cdots Mg2A$  vectors. The C17-, C20- and C29-based *iso*-propyl groups were all found to be disordered, and in each case two orientations were identified of *ca.* 69:31, 78:22 and 70:30% occupancy. The geometries of each pair of orientations were optimised, the thermal parameters of adjacent atoms were restrained to be similar, and only the non-hydrogen atoms of the major occupancy orientations were refined anisotropically (those of the minor occupancy orientations were refined isotropically). The C61-based included benzene solvent molecule was found to be disordered across a  $C_2$  axis, and this was modelled by using one complete, 50% occupancy orientation, with a further orientation being generated by operation of the inversion centre. The geometry of the unique orientation was idealised, the thermal parameters of adjacent atoms were restrained to be similar, and all the non-hydrogen atoms were refined anisotropically.

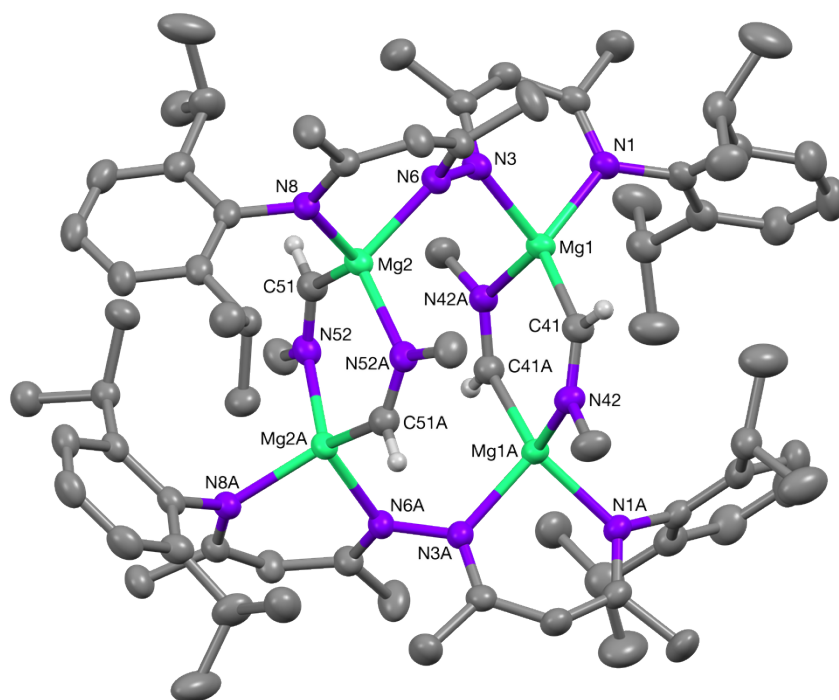

**Figure S12.** The crystal structure of the  $C_2$ -symmetric complex **2b** (50% probability ellipsoids). Hydrogen atoms with the exception of hydride ligands have been omitted for clarity.

### The X-ray crystal structure of **2c**

The bridging hydride atom in the structure of **2c** was both located from a  $\Delta F$  map and refined freely.

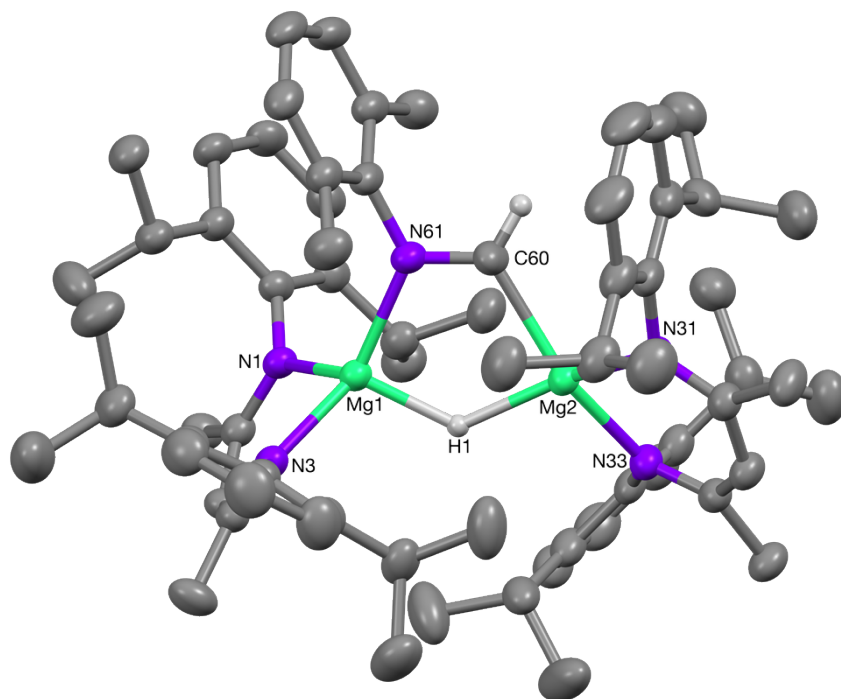

**Figure S13.** The crystal structure of **2c** (50% probability ellipsoids). Hydrogen atoms with the exception of hydride ligands have been omitted for clarity.

### The X-ray crystal structure of **3<sub>2</sub>**

The structure of **3<sub>2</sub>** was found to sit across a  $C_2$  axis that passes through the middle of the  $Mg_2O_2$  ring and bisects the  $Mg_2 \cdots Mg_2A$  vector. The C20-based *iso*-propyl group was found to be disordered, and two orientations were identified of *ca.* 83 and 17% occupancy. Their geometries were optimised, the thermal parameters of adjacent atoms were restrained to be similar, and only the non-hydrogen atoms of the major occupancy orientation were refined anisotropically (those of the minor occupancy orientation were refined isotropically).

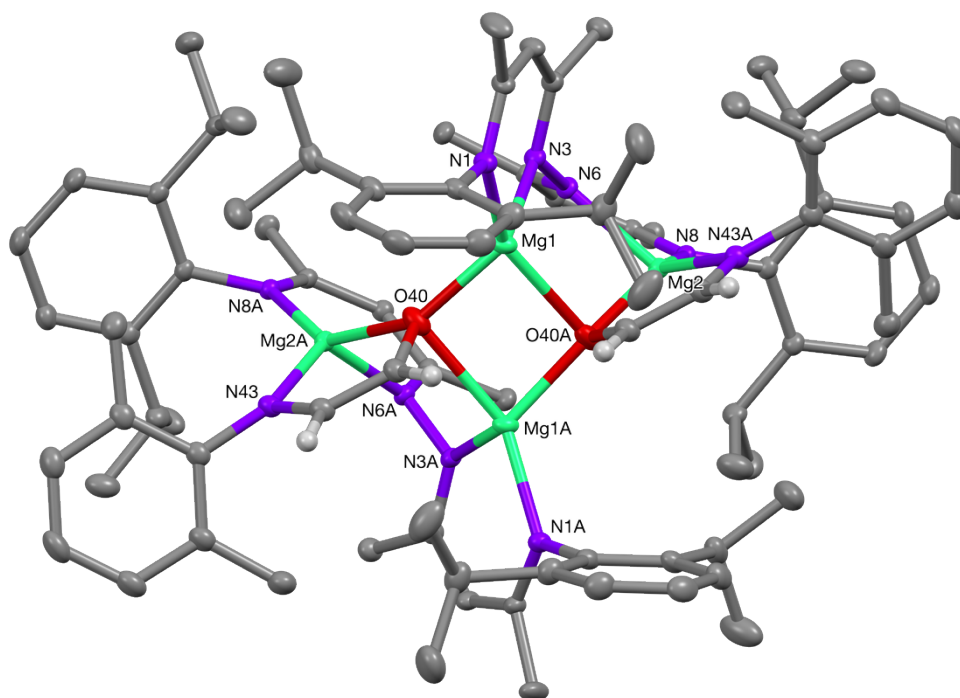

**Figure S14.** The crystal structure of the  $C_2$ -symmetric complex **3<sub>2</sub>** (20% probability ellipsoids). Hydrogen atoms with the exception of hydride ligands have been omitted for clarity.

### The X-ray crystal structure of **3-THF<sub>2</sub>**

The O60-based coordinated thf solvent molecule in the structure of **3-THF<sub>2</sub>** was found to be disordered, and two orientations for the C<sub>4</sub>H<sub>8</sub> linkage were identified of *ca.* 71 and 29% occupancy. Their geometries were optimised, the thermal parameters of adjacent atoms were restrained to be similar, and only the non-hydrogen atoms of the major occupancy orientation were refined anisotropically (those of the minor occupancy orientation were refined isotropically).

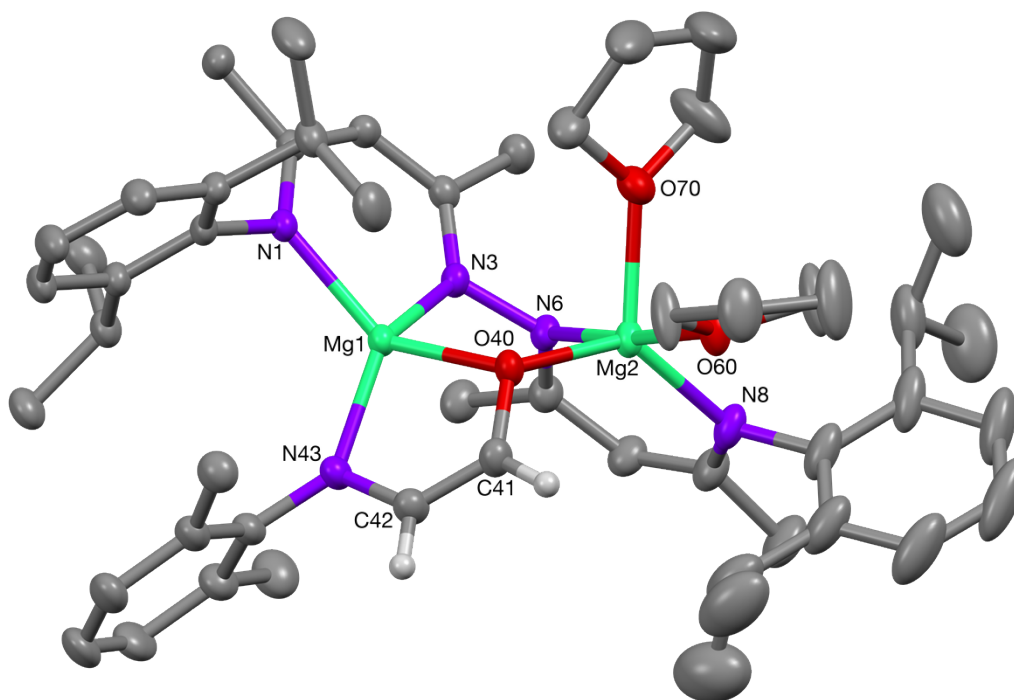

**Figure S15.** The crystal structure of **3-THF<sub>2</sub>** (30% probability ellipsoids). Hydrogen atoms with the exception of hydride ligands have been omitted for clarity.

### The X-ray crystal structure of **4a**

The included solvent in the structure of **4a** was found to be highly disordered, and the best approach to handling this diffuse electron density was found to be the SQUEEZE routine of PLATON.<sup>[S8]</sup> This suggested a total of 79 electrons per unit cell, equivalent to 19.8 electrons per complex. With the refinements from before the use of SQUEEZE giving no clear indication as to the identity of the solvent, unsurprisingly fitting equally well to both pentane (C<sub>5</sub>H<sub>12</sub>, 42e) and diethyl ether (C<sub>4</sub>H<sub>10</sub>O, 42e), the most recently used solvent (pentane) was assumed. 0.5 pentane molecules correspond to 21 electrons, so this was used as the solvent present. As a result, the atom list for the asymmetric unit is low by 0.5(C<sub>5</sub>H<sub>12</sub>) = C<sub>2.5</sub>H<sub>6</sub> (and that for the unit cell low by C<sub>10</sub>H<sub>24</sub>) compared to what is actually presumed to be present.

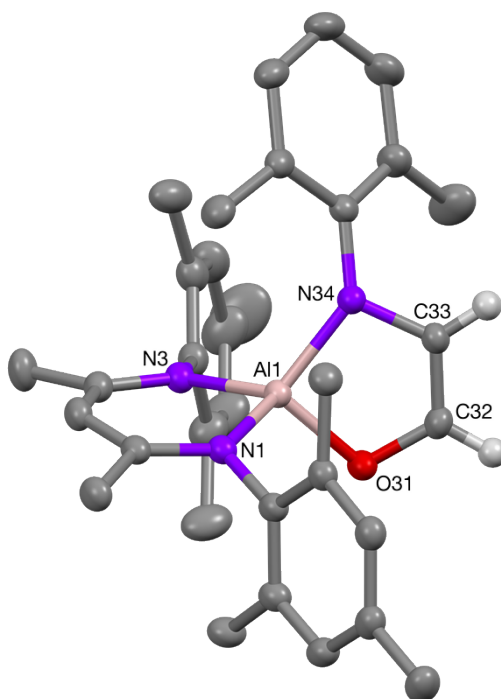

**Figure S16.** The crystal structure of **4a** (30% probability ellipsoids). Hydrogen atoms with the exception of hydride ligands have been omitted for clarity.



## 4) DFT Studies

### 4.1. Computational methods

DFT calculations were performed using Gaussian 09 (Revision D.01) using an ultrafine integration grid (int=ultrafine).<sup>[S9]</sup> Geometry optimisations and frequency calculations were performed using the B3PW91 density functional including solvent (PCM, benzene,  $\epsilon = 2.2706$ ) and dispersion corrections (D3) with SDDAll (Mg), 6-31G\*\* (C, H) and 6-31+G\* (N, O) basis set. Frequency analyses for all stationary points were performed using the enhanced criteria to confirm the nature of the structures as either minima (no imaginary frequency) or transition states (only one imaginary frequency). The electronic energies of the optimised geometries were calculated using the B3PW91 functional including solvent and dispersion corrections (D3) with 6-311+G\*\* basis sets for all atoms with solvent corrections (PCM, benzene,  $\epsilon = 2.2706$ ). The Gibbs free energy correction from the frequency calculation was added to this electronic energy to generate Gibbs free energy values for the calculated stationary points.

Intrinsic reaction coordinate (IRC) calculations were used to connect transition states and minima located on the potential energy surface allowing a full energy profile (calculated at 298.15 K, 1 atm.) of the reaction to be constructed.

NBO analysis was performed at the B3PW91/6-311+G\*\* level with dispersion corrections (D3) and solvent corrections (PCM, benzene,  $\epsilon = 2.2706$ ) for all atoms by using NBO 6.0.<sup>[S10]</sup>

QTAIM was performed at the B3PW91/6-311+G\*\* level with dispersion corrections (D3) and solvent corrections (PCM, benzene,  $\epsilon = 2.2706$ ) for all atoms by using Gaussian 09. QTAIM analysis was conducted using the AIMAll software.<sup>[S11-S12]</sup>

## 4.2. Calculated Reaction Pathway

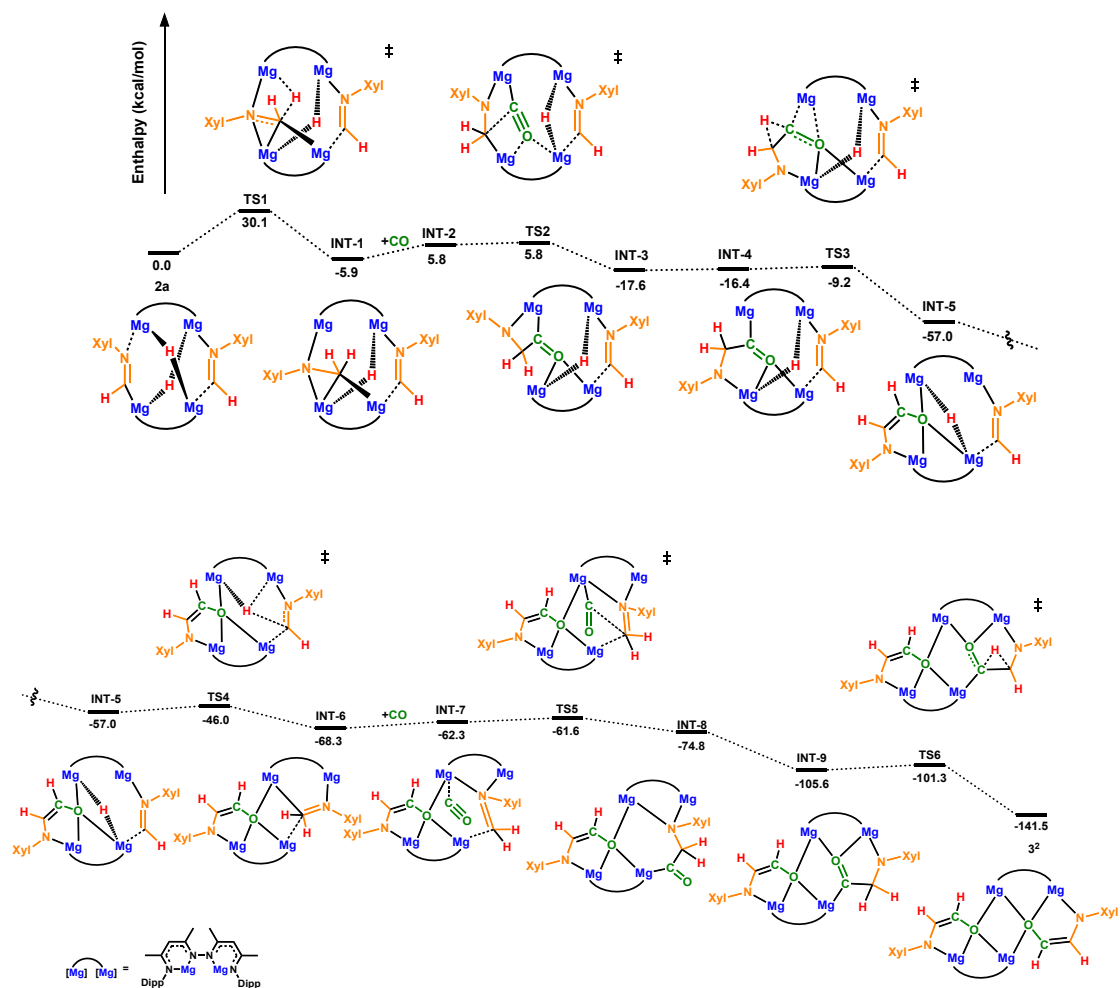

**Figure S17.** Proposed pathway for the coupling of CO and Isocyanide based on DFT calculation G09 (Enthalpy). Level of theory: B3PW91-D3 / 6-311+G\*\* / PCM (benzene) // B3PW91-D3 / 6-31G\*\* (C,H,N,O) / SDDall (Mg) / PCM (benzene). Enthalpy kcal mol<sup>-1</sup>.

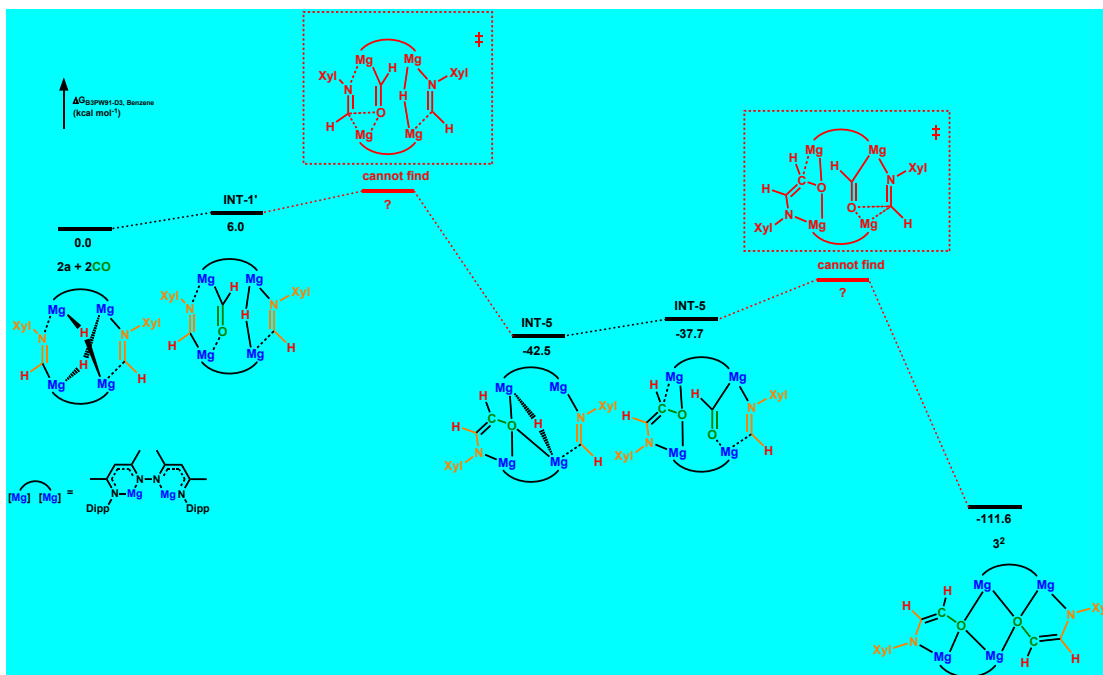

**Figure S18.** Proposed pathway for the coupling of CO and Isocyanide based on DFT calculation G09 (Enthalpy). Level of theory: B3PW91-D3 / 6-311+G\*\* / PCM (benzene) // B3PW91-D3 / 6-31G\*\* (C,H,N,O) / SDDAll (Mg) / PCM (benzene). Gibbs Energies kcal mol<sup>-1</sup>.

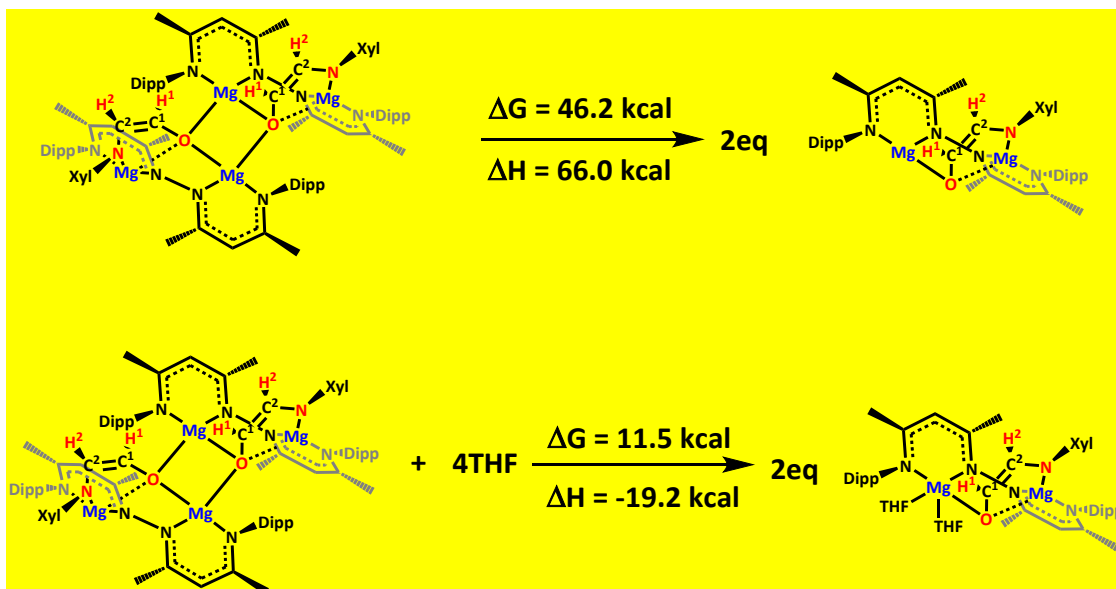

**Figure S19.** Thermodynamics of monomer formation from **3<sub>2</sub>** in the absence and presence of THF. Level of theory: B3PW91-D3 / 6-311+G\*\* / PCM (benzene) // B3PW91-D3 / 6-31G\*\* (C,H,N,O) / SDDAll (Mg) / PCM (benzene). Gibbs Energies kcal mol<sup>-1</sup>.



### 4.3. NBO Analysis of **3<sub>2</sub>**, 3-THF<sub>2</sub>, and 4.

NBO analysis was performed at the B3PW91/6-311+G\*\* level with dispersion corrections (D3) and solvent corrections (PCM, benzene,  $\epsilon = 2.2706$ ) for all atoms by using NBO 6.0.<sup>[S10]</sup>

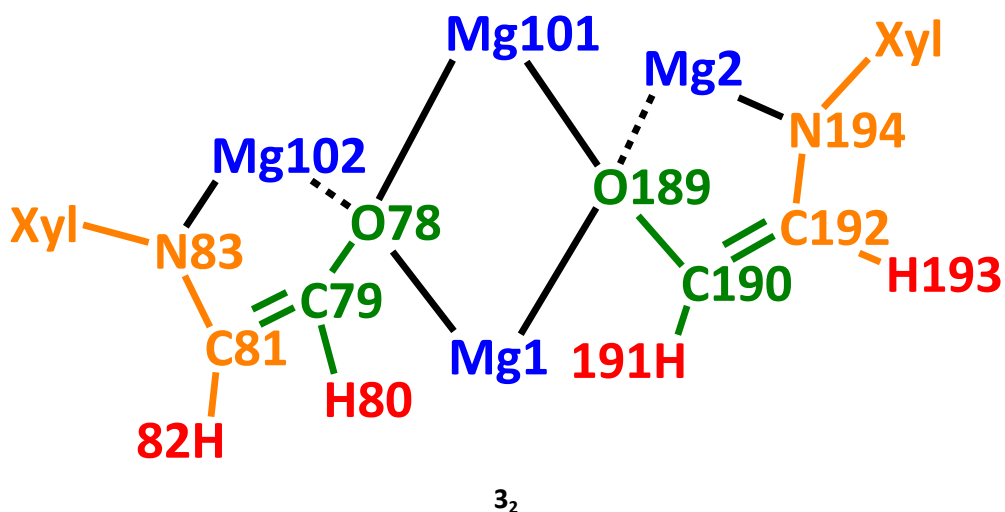

**Table S3.** NPA charge data for **3<sub>2</sub>**. (The  $\beta$ -diketiminato ligand has been omitted for clarity)  
Level of theory: B3PW91-D3 / 6-311+G\*\*/ PCM (benzene).

| Atom  | No  | Charge |
|-------|-----|--------|
| Mg1   | 1   | 1.83   |
| Mg2   | 2   | 1.82   |
| Mg101 | 101 | 1.84   |
| Mg102 | 102 | 1.82   |
| H80   | 80  | 0.20   |
| H82   | 82  | 0.20   |
| H191  | 191 | 0.21   |
| H193  | 193 | 0.20   |
| C79   | 79  | -0.19  |
| C81   | 81  | -0.01  |
| C190  | 190 | -0.25  |
| C192  | 192 | 0.01   |
| N83   | 83  | -0.94  |
| N194  | 194 | -0.91  |
| O78   | 78  | -1.20  |
| O189  | 189 | -1.19  |

**Table S4.** WBI data for **3<sub>2</sub>**. Level of theory: B3PW91-D3 / 6-311+G\*\*/ PCM (benzene).

| <b>Wiberg bond index matrix</b> |       |
|---------------------------------|-------|
| Mg1 - O78                       | 0.036 |
| Mg1 - O189                      | 0.022 |
| Mg101 - O78                     | 0.023 |
| Mg101 - O189                    | 0.033 |
| Mg2 - O189                      | 0.032 |
| Mg2 - N194                      | 0.061 |
| Mg102 - O78                     | 0.032 |
| Mg102 - N83                     | 0.063 |
| C79 - O78                       | 0.937 |
| C79 - C81                       | 1.624 |
| C79 - H80                       | 0.902 |
| C81 - N83                       | 1.249 |
| C81 - H82                       | 0.902 |
| C190 - O189                     | 0.939 |
| C190 - C192                     | 1.569 |
| C190 - H191                     | 0.897 |
| C192 - N194                     | 1.296 |
| C192 - H193                     | 0.902 |

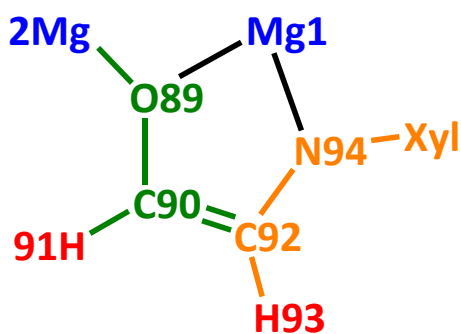

**Table S5.** NPA charge data for **3-THF<sub>2</sub>**. (The  $\beta$ -diketiminato ligand has been omitted for clarity) Level of theory: B3PW91-D3 / 6-311+G\*\*/ PCM (benzene).

| Atom | No | Charge |
|------|----|--------|
| Mg1  | 1  | 1.81   |
| Mg2  | 2  | 1.82   |
| C90  | 90 | -0.03  |
| C92  | 92 | -0.08  |
| N94  | 94 | -0.96  |
| O89  | 89 | -1.16  |
| H91  | 91 | 0.17   |
| H93  | 93 | 0.19   |

**Table S6.** WBI data for **3-THF<sub>2</sub>**. (The  $\beta$ -diketiminato ligand has been omitted for clarity) Level of theory: B3PW91-D3 / 6-311+G\*\*/ PCM (benzene).

| Wiberg bond index matrix |       |
|--------------------------|-------|
| Mg1 - O89                | 0.038 |
| Mg2 - O89                | 0.037 |
| Mg1 - N94                | 0.079 |
| C90 - O89                | 0.985 |
| C90 - C92                | 1.706 |
| C92 - N94                | 1.150 |
| C90 - H91                | 0.917 |
| C92 - C93                | 0.912 |

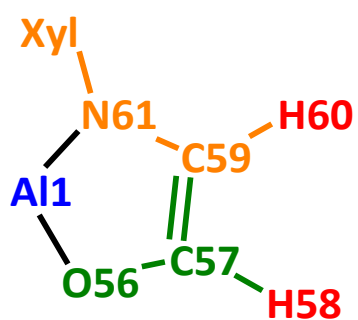

**Table S7.** NPA charge data for **4**. (The  $\beta$ -diketiminato ligand has been omitted for clarity)  
Level of theory: B3PW91-D3 / 6-311+G\*\*/ PCM (benzene).

| Atom | No | Charge |
|------|----|--------|
| Al1  | 1  | 2.15   |
| C57  | 57 | 0.07   |
| C59  | 59 | -0.12  |
| O56  | 56 | -0.98  |
| N61  | 61 | -1.00  |
| H58  | 58 | 0.18   |
| H60  | 60 | 0.21   |

**Table S8.** WBI data for **4**. (The  $\beta$ -diketiminato ligand has been omitted for clarity) Level  
of theory: B3PW91-D3 / 6-311+G\*\*/ PCM (benzene).

| Wiberg bond index matrix |       |
|--------------------------|-------|
| Al1 - O56                | 0.327 |
| Al1 - N61                | 0.335 |
| C57 - O56                | 1.024 |
| C57 - C59                | 1.763 |
| C59 - N61                | 1.044 |
| C59 - H60                | 0.909 |
| C57 - H58                | 0.915 |



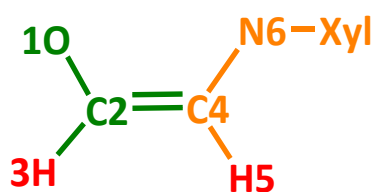

**Table S9.** NPA charge data for **cis-enamidolate dianion**. Level of theory: B3PW91-D3 / 6-311+G\*\*/ PCM (benzene).

| Atom | No | Charge |
|------|----|--------|
| O1   | 1  | -0.91  |
| C2   | 2  | 0.13   |
| C4   | 4  | -0.25  |
| N6   | 6  | -0.67  |
| H3   | 3  | 0.05   |
| H5   | 5  | 0.13   |

**Table S10.** WBI data for **cis-enamidolate dianion**. Level of theory: B3PW91-D3 / 6-311+G\*\*/ PCM (benzene).

| Wiberg bond index matrix |       |
|--------------------------|-------|
| O1 - C2                  | 1.285 |
| C2 - C4                  | 1.616 |
| C4 - N6                  | 1.111 |
| C2 - H3                  | 0.905 |
| C4 - H5                  | 0.922 |

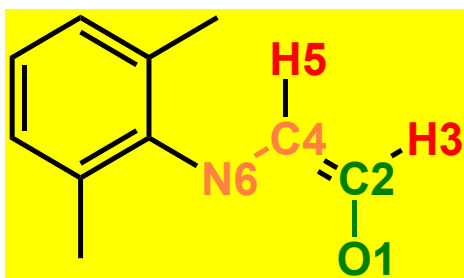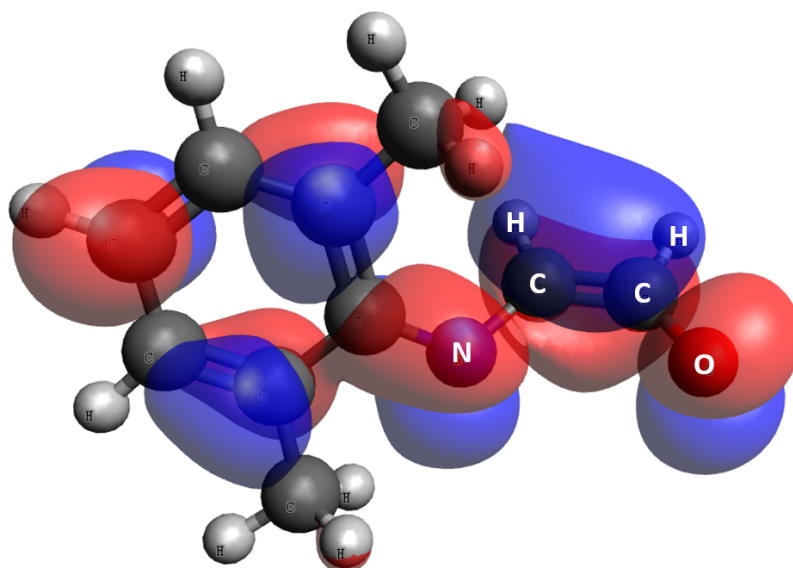

**HOMO**  
 **$\pi$ -donor**

**Figure S20.** HOMO of cis-enamidolate dianion (isovalue = 0.02)

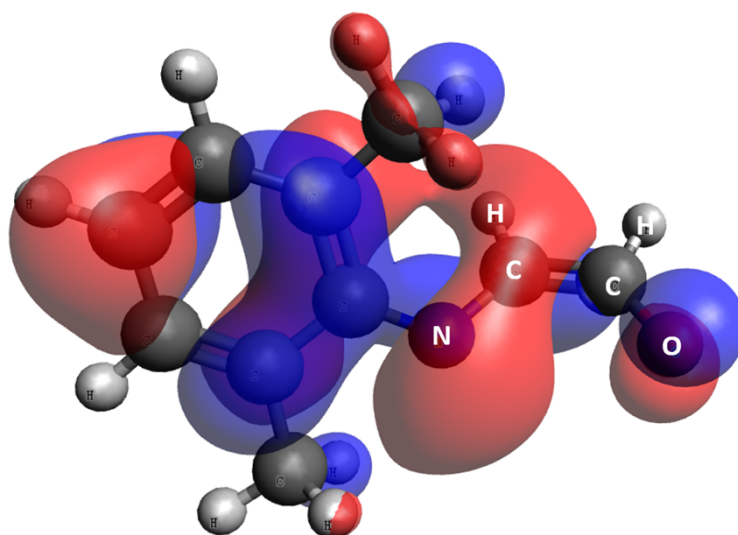

**HOMO-1**  
**N-LP  $\sigma$ -donor**

**Figure S21.** HOMO-1 of cis-enamidolate dianion (isovalue = 0.02)

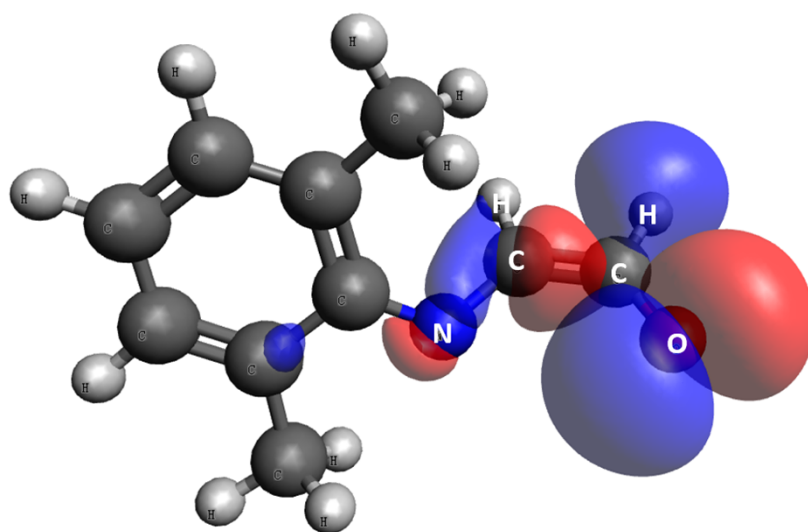

**HOMO-2**  
**O-LP  $\sigma$ -donor**

**Figure S22.** HOMO-2 of cis-enamidolate dianion (isovalue = 0.02)

#### 4.4. QTAIM Analysis

QTAIM was performed at the B3PW91/6-311+G\*\* level with dispersion corrections (D3) and solvent corrections (PCM, benzene,  $\epsilon = 2.2706$ ) for all atoms by using Gaussian 09. QTAIM analysis was conducted using the AIMAll software.<sup>[S11-S12]</sup> The AIM analysis returns bond paths and bond critical points in key atoms in the core structure. In particular, for the ethene amidolate ligand bond paths are located between N and Mg, O and Mg, O and C, C and C, and C and N creating a ring structure. A ring critical point is located in the centre of this structure.  $\rho(r)$  values are consistent with ionic bonding between Mg and N and Mg and O (Table S11). AIM also shows a very weak electrostatic interaction between the two O atoms of the central  $Mg_2O_2$  core of the molecule.

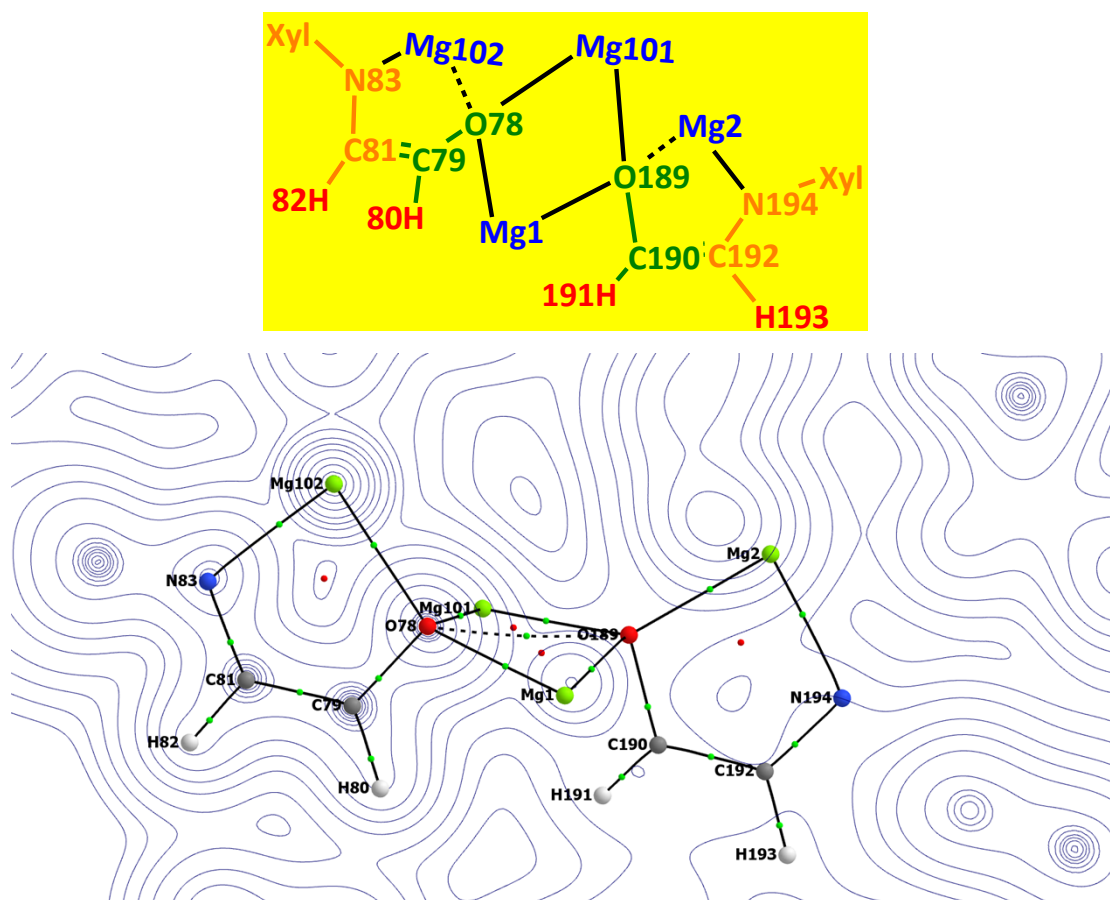

**Figure S23.** QTAIM molecular graphs for  $3_2$ . (QTAIM methodology level: B3PW91-D3 / 6-311+G\*\* / PCM (benzene)). The  $\beta$ -diketimate ligand has been omitted for clarity. Coordinates of 3 points in plane. Point One: Mg102; Point Two: O78; Point Three: C79. Bond critical points shown in green, ring critical points shown in red. Electron density value below  $10^{-5}$  not be shown. Bond paths terminating at a critical point with an electron density which below 0.025 will be shown as dashed (instead of solid). Bond critical points with an electron density above 0.025 will be shown as solid lines.

**Table S11.** QTAIM data for **3<sub>2</sub>**. (QTAIM methodology level: B3PW91-D3 / 6-311+G\*\*/ PCM (benzene))

| Atoms        | $r(r)$ (e bohr <sup>-3</sup> ) | $\nabla^2 r(r)$ (e bohr <sup>-5</sup> ) | Ellipticity |
|--------------|--------------------------------|-----------------------------------------|-------------|
| O78 - O189   | 0.022207                       | 0.052476                                | 0.933118    |
| O78 - Mg102  | 0.032328                       | 0.212114                                | 0.045635    |
| O78 - Mg101  | 0.03538                        | 0.242529                                | 0.059442    |
| O78 - C79    | 0.244303                       | -0.314433                               | 0.162553    |
| O189 - C190  | 0.24428                        | -0.327023                               | 0.185121    |
| N83 - Mg102  | 0.050172                       | 0.328751                                | 0.117469    |
| Mg2 - O189   | 0.035176                       | 0.239139                                | 0.053894    |
| Mg2 - N194   | 0.048806                       | 0.318146                                | 0.107647    |
| Mg101 - O189 | 0.046748                       | 0.353249                                | 0.091705    |
| Mg1 - O78    | 0.044735                       | 0.332535                                | 0.092657    |
| Mg1 - O189   | 0.031177                       | 0.206858                                | 0.092939    |
| C81 - N83    | 0.317926                       | -0.910697                               | 0.118588    |
| C81 - H82    | 0.278559                       | -0.94939                                | 0.026522    |
| C79 - H80    | 0.277912                       | -0.927166                               | 0.098807    |
| C79 - C81    | 0.326292                       | -0.93069                                | 0.410372    |
| C192 - N194  | 0.324221                       | -0.92519                                | 0.118233    |
| C192 - H193  | 0.279323                       | -0.955642                               | 0.023157    |
| C190 - H191  | 0.27585                        | -0.912478                               | 0.102157    |
| C190 - C192  | 0.321478                       | -0.910846                               | 0.377185    |

## 5) NMR Spectra

### 5.1. NMR Spectra of Isolated complexes

$^1\text{H}$  NMR ( $\text{C}_6\text{D}_6$ , 400 MHz) of **2a**: “\*” is the peak of diethyl ether.

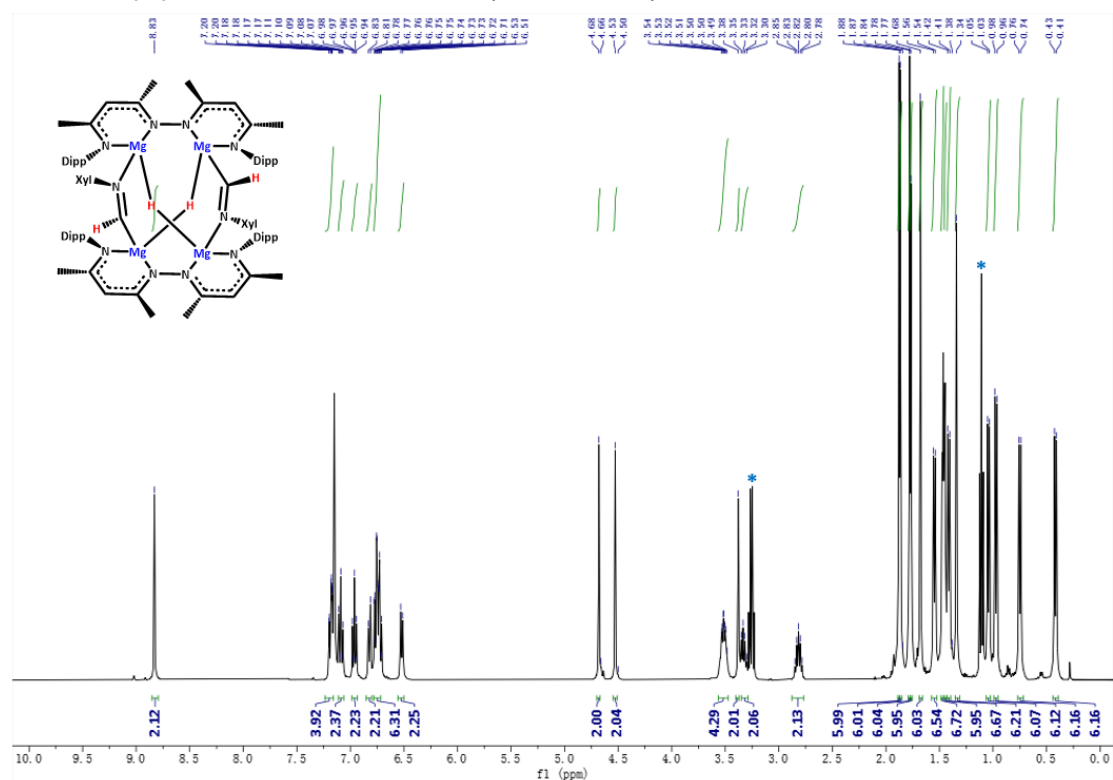

$^{13}\text{C}$  NMR ( $\text{C}_6\text{D}_6$ , 101 MHz) of **2a**: “\*” is the peak of diethyl ether.

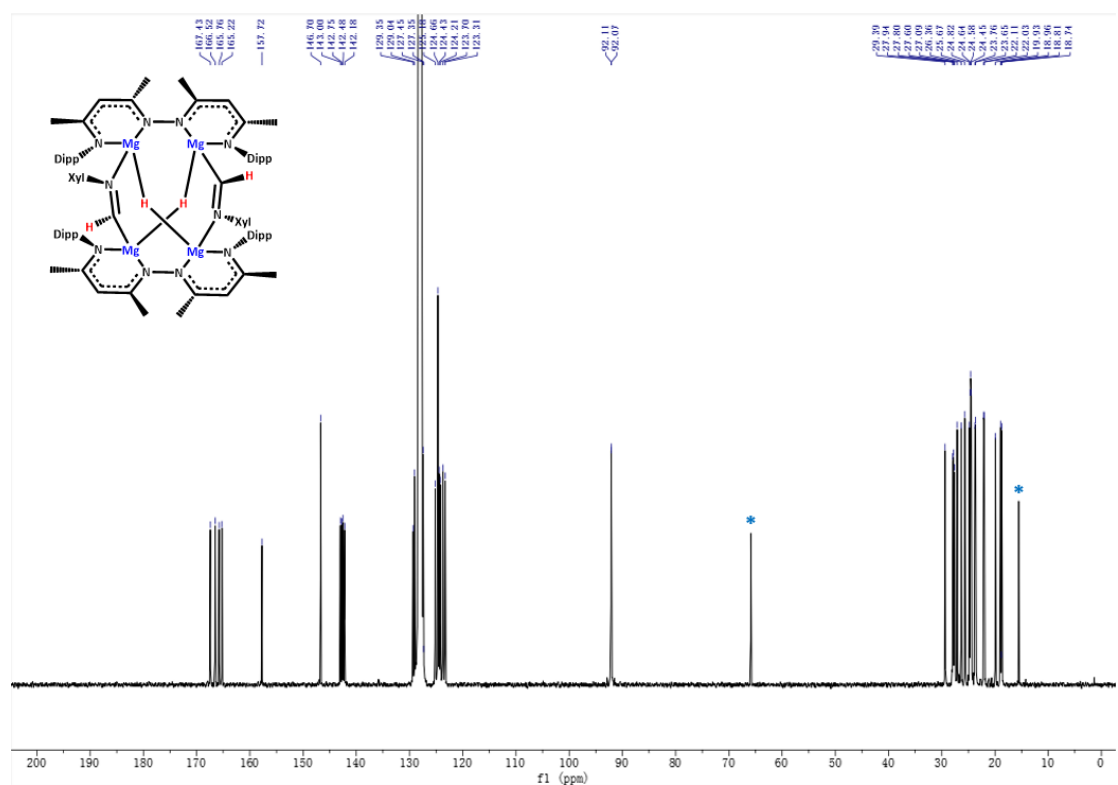



$^1\text{H}$  NMR ( $\text{C}_6\text{D}_6$ , 400 MHz) of **3<sub>2</sub>**: “\*” is the peak of diethyl ether.

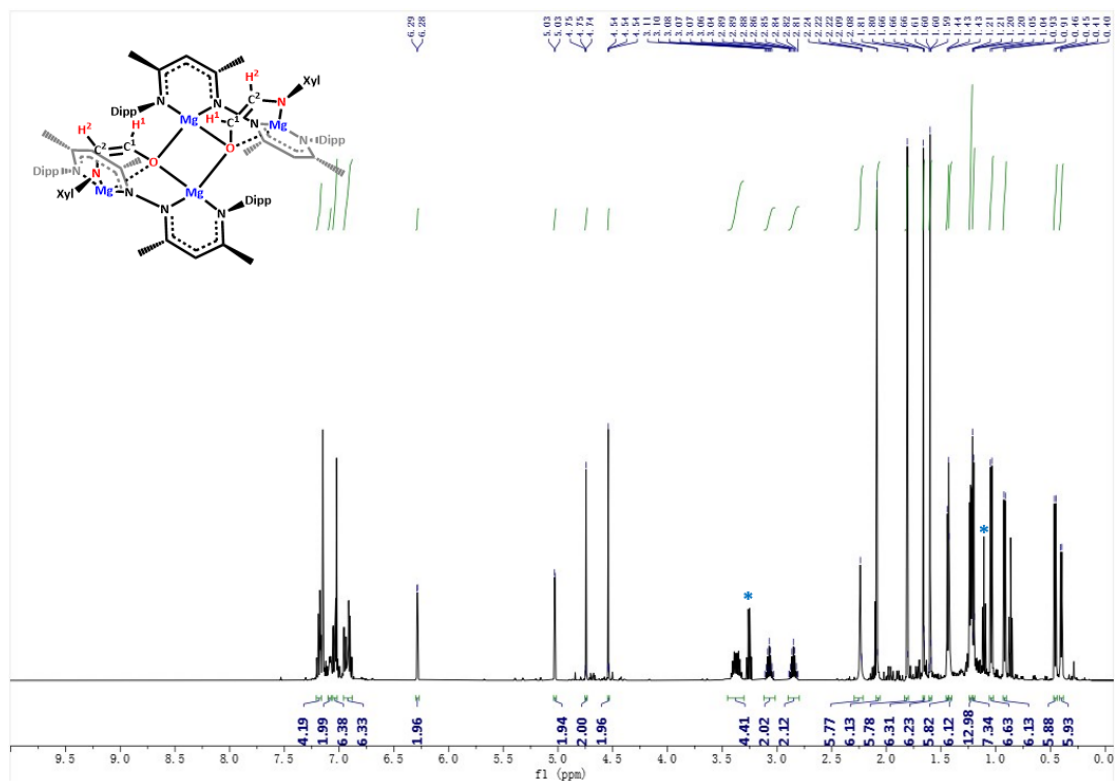

$^{13}\text{C}$  NMR ( $\text{C}_6\text{D}_6$ , 101 MHz) of **3<sub>2</sub>**: “\*” is the peak of diethyl ether.

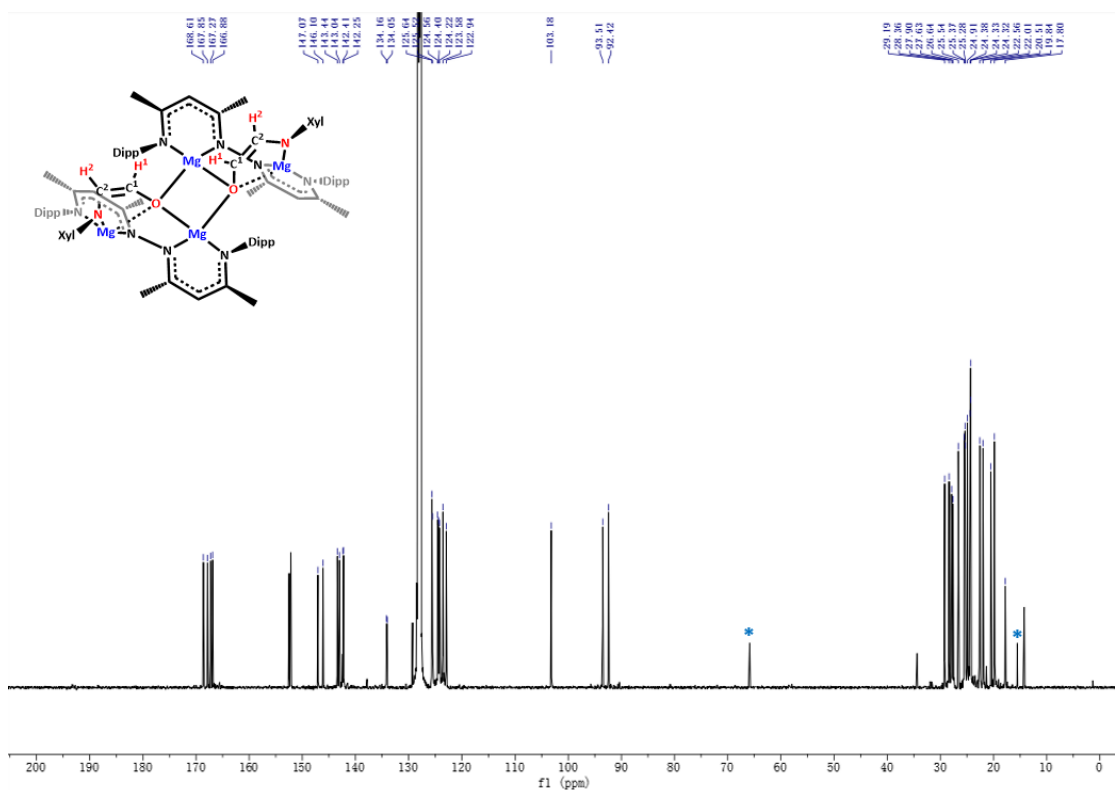



$^1\text{H}$  NMR ( $d_8$ -THF, 400 MHz) of **3-THF<sub>2</sub>**:

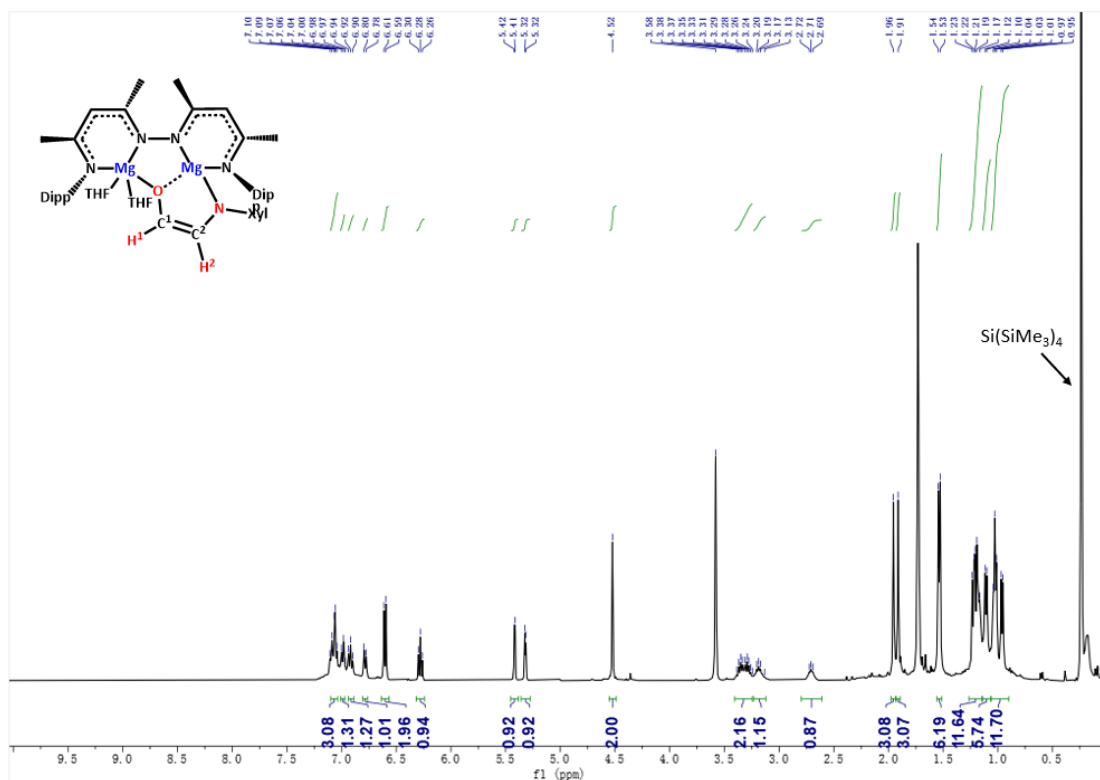

$^{13}\text{C}$  NMR ( $d_8$ -THF, 101 MHz) of **3-THF<sub>2</sub>**:

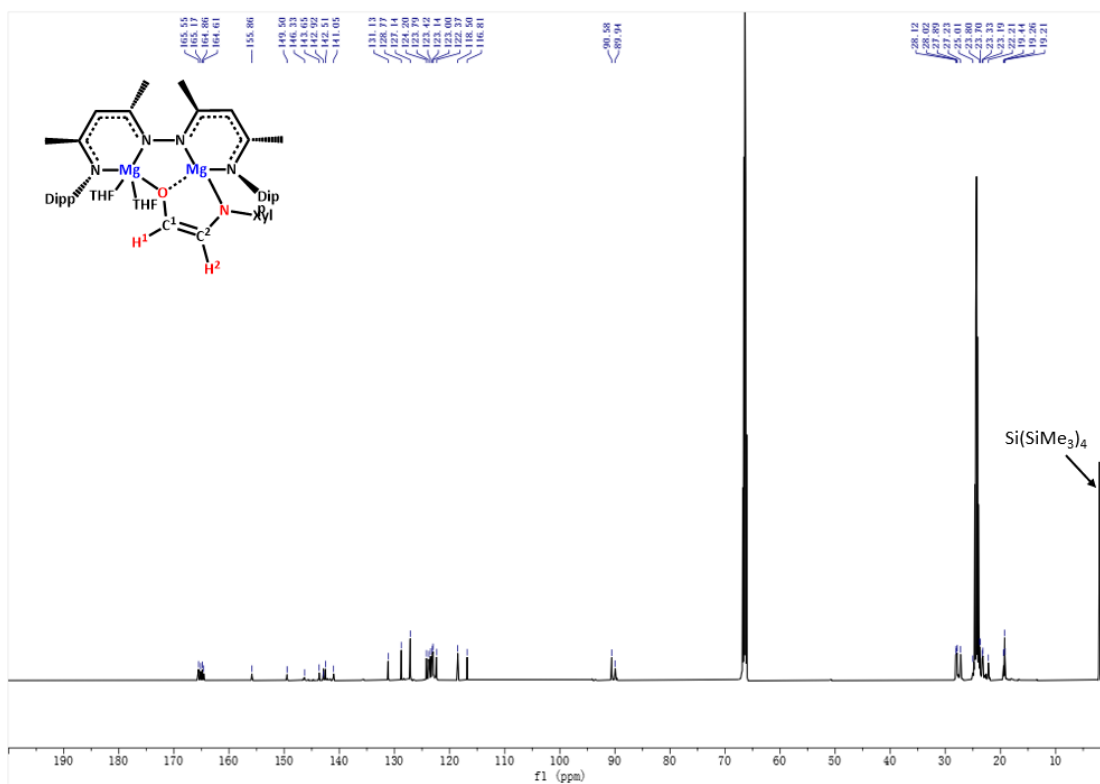



$^1\text{H}$  NMR ( $\text{C}_6\text{D}_6$ , 400 MHz) of **4**: “\*” is the peak of diethyl ether.

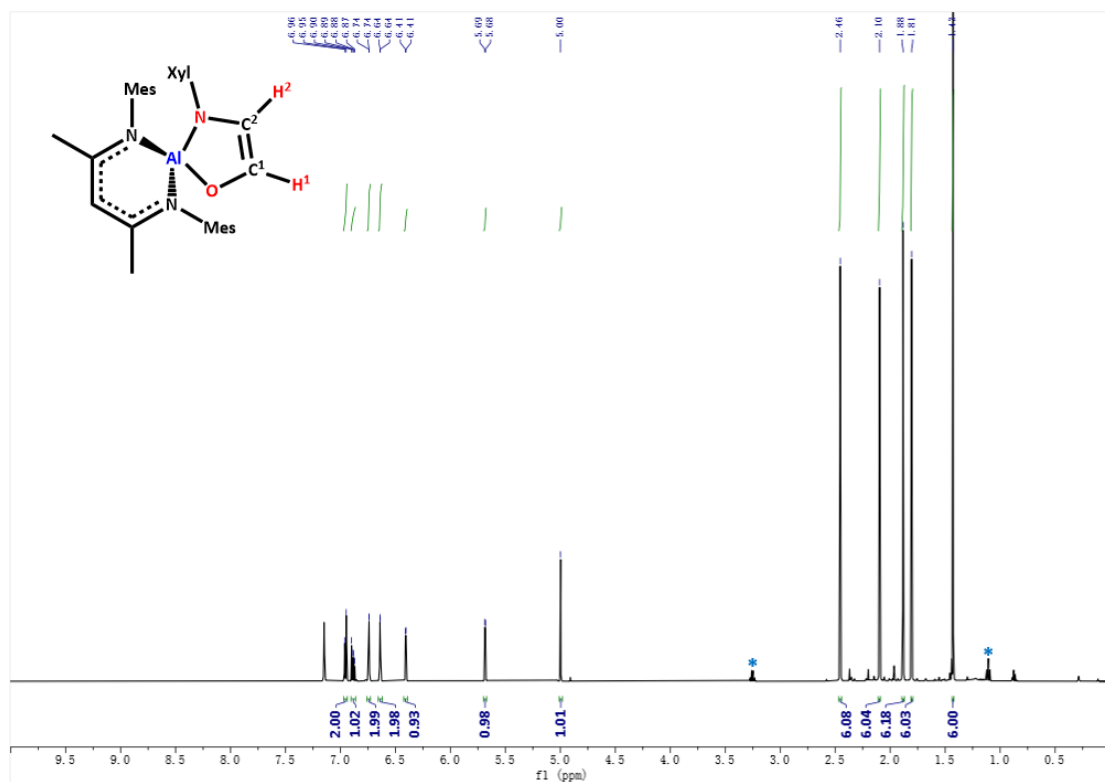

$^{13}\text{C}$  NMR ( $\text{C}_6\text{D}_6$ , 101 MHz) of **4**: “\*” is the peak of diethyl ether.

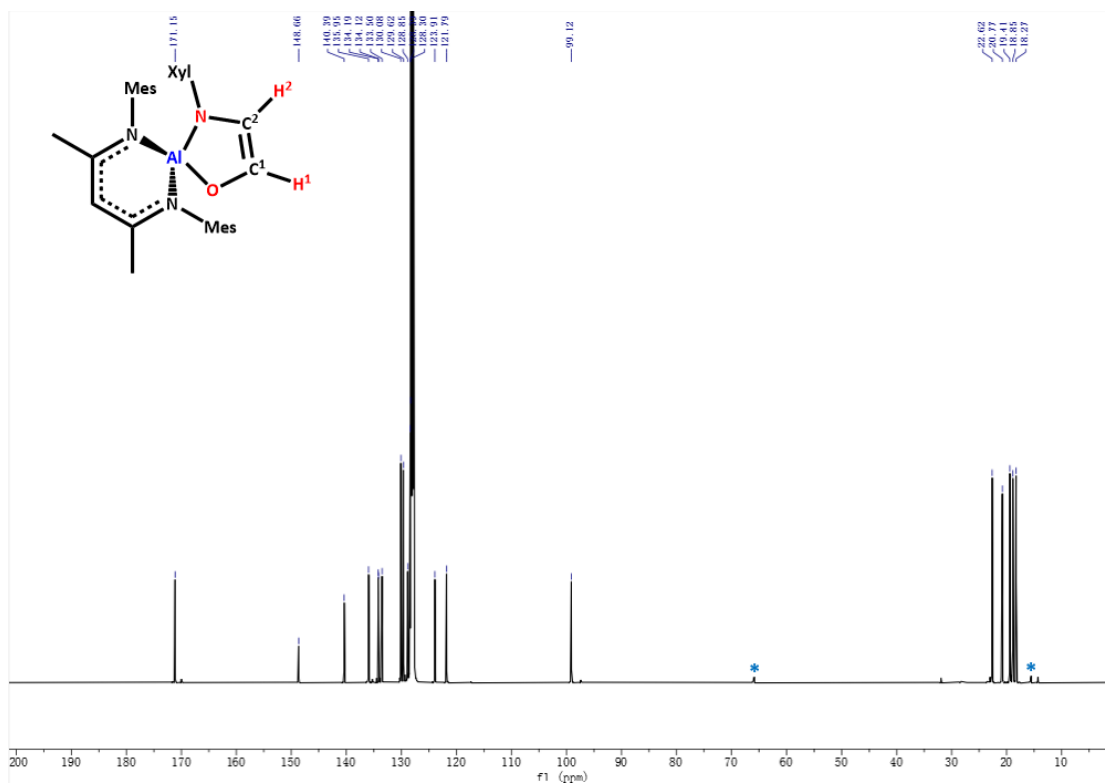

## 5.2. NMR Spectra for Determining the NMR Yields of 5

$^1\text{H}$  NMR ( $\text{C}_6\text{D}_6$ , 400 MHz) of 5: “\*” is the peak of 5, “\*” is the peak of  $^{\text{Mes}}\text{BDIAIF}_2$ , “\*” is the peak of  $\text{BF}_3\text{-Et}_2\text{O}$ .

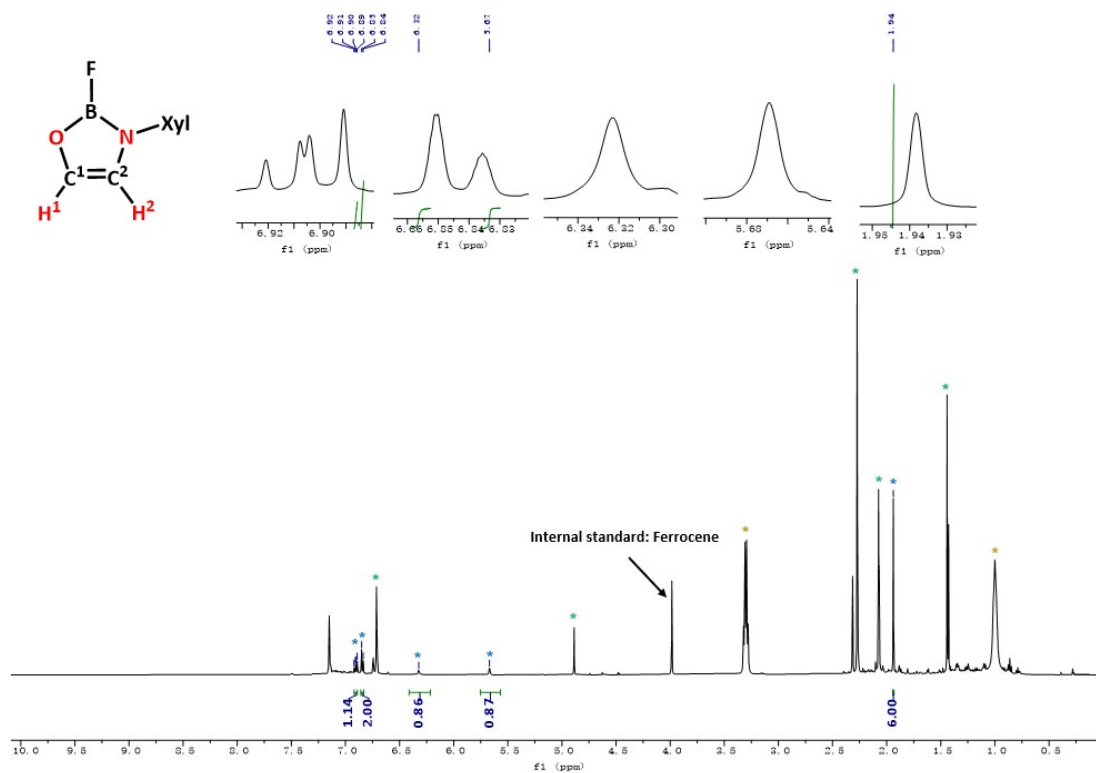

$^{11}\text{B}$  NMR ( $\text{C}_6\text{D}_6$ , 128.0MHz) of 5:

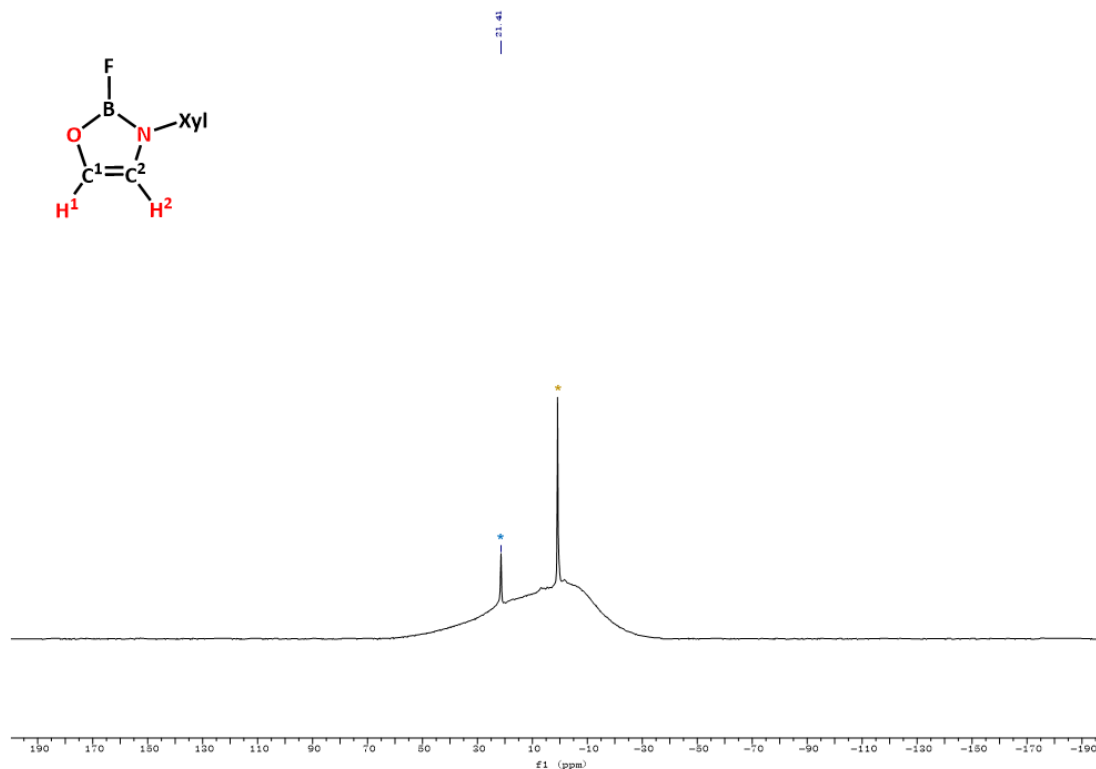

$^{19}\text{F}$  NMR ( $\text{C}_6\text{D}_6$ , 376.5 MHz) of **5**:

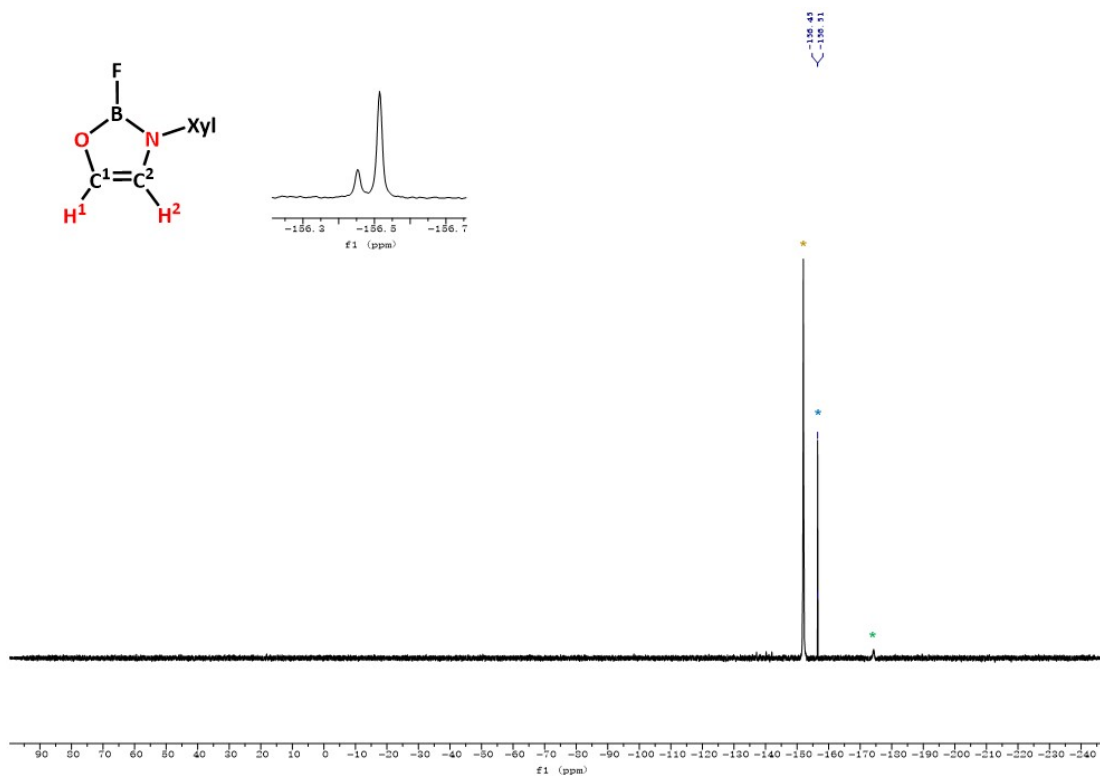

## 6) IR Spectroscopy

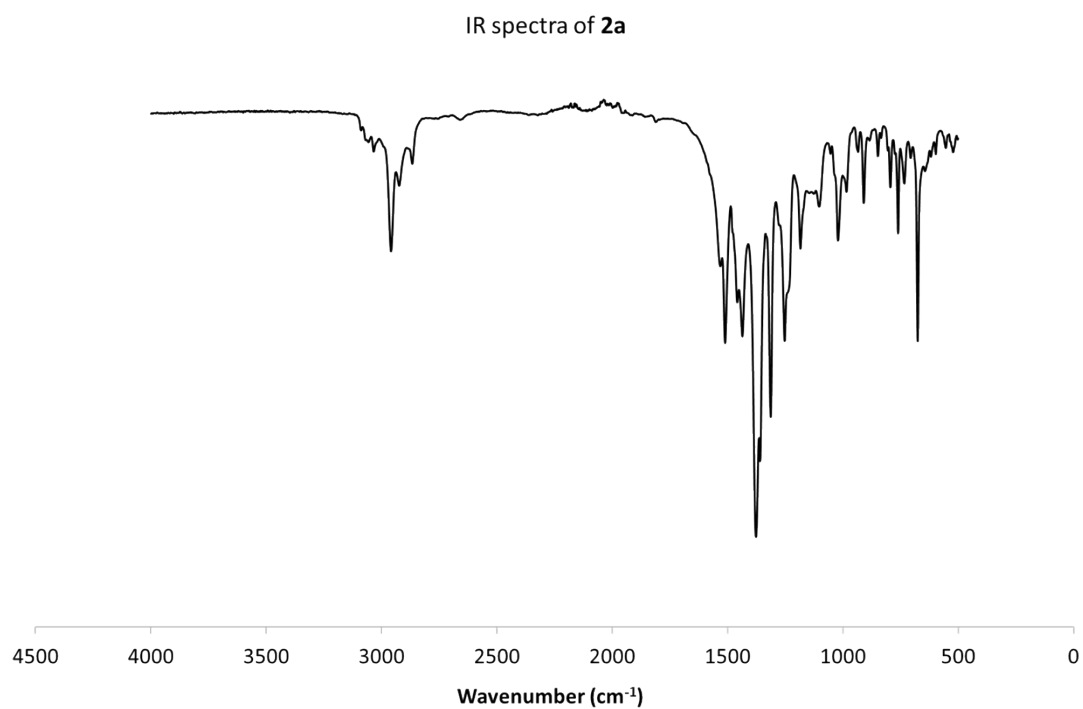

**Figure S24.** Infrared spectra of **2a**

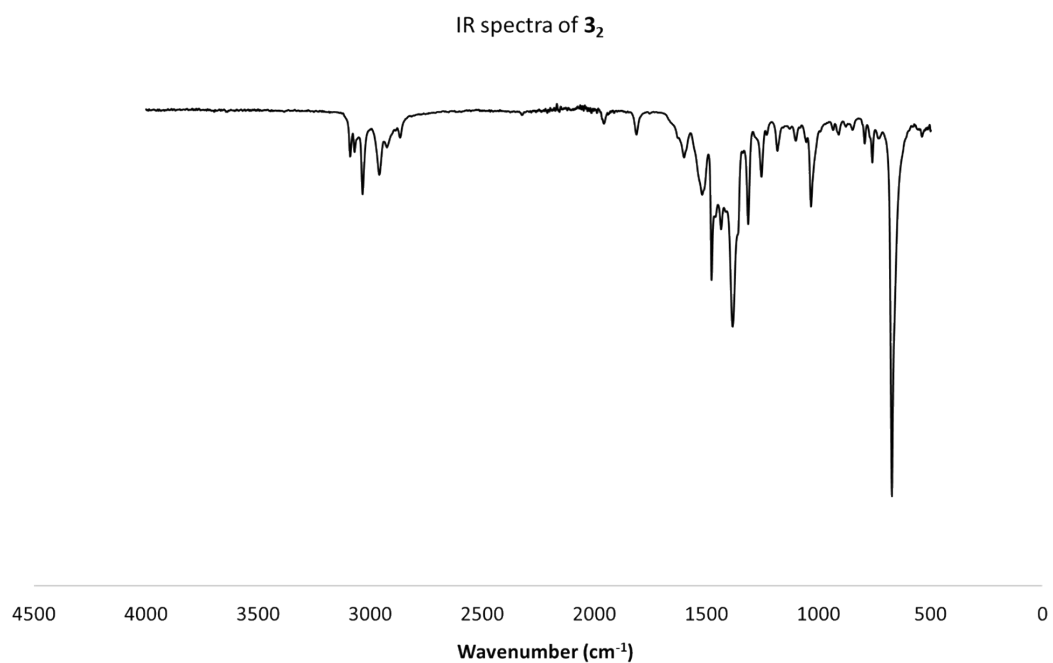

**Figure S25.** Infrared spectra of **3<sub>2</sub>**

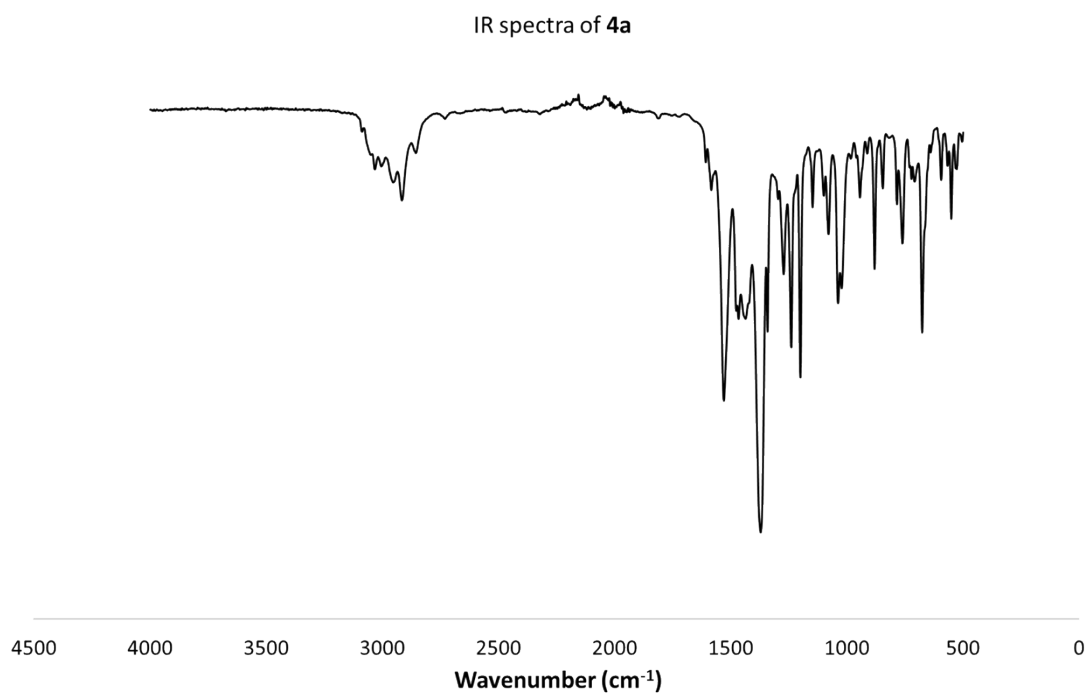

**Figure S26.** Infrared spectra of **4**

## 6) XYZ Coordinates

|                    |                |           |           |   |           |           |           |
|--------------------|----------------|-----------|-----------|---|-----------|-----------|-----------|
| 2.log              |                |           |           | C | 3.049799  | 10.454270 | 17.717110 |
|                    |                |           |           | C | 2.067037  | 10.123055 | 18.652722 |
| SCF (B3PW91) =     | -3898.52251869 |           |           | H | 1.711686  | 10.876960 | 19.347808 |
| E(SCF)+ZPE(0 K)=   | -3896.649681   |           |           | C | 1.511167  | 8.846267  | 18.693597 |
| H(298 K)=          | -3896.540365   |           |           | H | 0.745487  | 8.611158  | 19.428156 |
| G(298 K)=          | -3896.787348   |           |           | C | 1.913351  | 7.884364  | 17.774345 |
| Lowest Frequency = | 20.6968cm-1    |           |           | H | 1.442603  | 6.904949  | 17.784814 |
|                    |                |           |           | C | 2.895442  | 8.165614  | 16.818790 |
| Mg                 | 3.738540       | 10.492368 | 14.028706 | C | 3.598584  | 11.871608 | 17.606121 |
| Mg                 | 5.776132       | 11.609547 | 10.771541 | H | 3.713665  | 12.066128 | 16.531339 |
| Mg                 | 4.287351       | 8.181988  | 11.346675 | C | 2.654030  | 12.935846 | 18.165539 |
| Mg                 | 2.263962       | 10.940418 | 10.632578 | H | 1.641204  | 12.823306 | 17.776105 |
| H                  | 3.593521       | 9.242791  | 12.713278 | H | 3.013408  | 13.930741 | 17.884150 |
| H                  | 4.097608       | 11.031493 | 10.331597 | H | 2.613340  | 12.904216 | 19.260942 |
| N                  | 4.446638       | 9.802103  | 15.835057 | C | 4.987720  | 12.035490 | 18.241493 |
| C                  | 5.741874       | 9.605746  | 16.107395 | H | 4.972562  | 11.715482 | 19.289724 |
| C                  | 6.794985       | 10.141506 | 15.350637 | H | 5.287209  | 13.089379 | 18.216370 |
| H                  | 7.796549       | 9.878340  | 15.668942 | H | 5.754153  | 11.467841 | 17.712078 |
| C                  | 6.713107       | 11.070024 | 14.288282 | C | 3.244183  | 7.142502  | 15.750053 |
| N                  | 5.561662       | 11.405171 | 13.721910 | H | 4.150376  | 7.490803  | 15.245729 |
| C                  | 6.114102       | 8.789813  | 17.326292 | C | 3.526258  | 5.754150  | 16.331077 |
| H                  | 5.757587       | 9.274304  | 18.240624 | H | 4.334932  | 5.781446  | 17.068979 |
| H                  | 7.193857       | 8.651824  | 17.400598 | H | 3.813163  | 5.061855  | 15.534291 |
| H                  | 5.633813       | 7.807223  | 17.295130 | H | 2.642627  | 5.332507  | 16.821859 |
| C                  | 7.988184       | 11.720971 | 13.808796 | C | 2.142327  | 7.065456  | 14.682352 |
| H                  | 8.102862       | 11.612021 | 12.725649 | H | 1.185376  | 6.768535  | 15.127055 |
| H                  | 8.860283       | 11.288313 | 14.299835 | H | 2.402287  | 6.340627  | 13.902705 |
| H                  | 7.972714       | 12.797078 | 14.008849 | H | 1.998957  | 8.026845  | 14.180674 |
| N                  | 5.631901       | 12.358012 | 12.681861 | C | 6.865229  | 13.637894 | 8.829230  |
| C                  | 5.445766       | 13.623795 | 13.030416 | C | 8.257570  | 13.893207 | 8.795363  |
| C                  | 5.492676       | 14.681831 | 12.096692 | C | 8.913252  | 13.854377 | 7.562723  |
| H                  | 5.243814       | 15.661809 | 12.486292 | H | 9.986552  | 14.021867 | 7.527113  |
| C                  | 5.901655       | 14.638802 | 10.755341 | C | 8.220137  | 13.605979 | 6.381493  |
| N                  | 6.210764       | 13.518919 | 10.089145 | H | 8.748934  | 13.581719 | 5.432440  |
| C                  | 5.200980       | 13.965136 | 14.480947 | C | 6.847691  | 13.392897 | 6.423376  |
| H                  | 4.356862       | 13.395777 | 14.881900 | H | 6.308270  | 13.197968 | 5.500106  |
| H                  | 4.995928       | 15.029078 | 14.605122 | C | 6.149327  | 13.395566 | 7.635625  |
| H                  | 6.067120       | 13.700086 | 15.095454 | C | 9.047107  | 14.198000 | 10.060535 |
| C                  | 6.029206       | 15.969830 | 10.047420 | H | 8.332423  | 14.361700 | 10.872295 |
| H                  | 7.077869       | 16.279524 | 9.995941  | C | 9.889030  | 15.473463 | 9.917960  |
| H                  | 5.471370       | 16.748135 | 10.571226 | H | 10.709461 | 15.337141 | 9.204865  |
| H                  | 5.669902       | 15.903670 | 9.016330  | H | 10.335744 | 15.741844 | 10.881298 |
| C                  | 3.485046       | 9.447510  | 16.821063 | H | 9.289690  | 16.321602 | 9.571507  |



|   |           |           |           |   |           |           |           |
|---|-----------|-----------|-----------|---|-----------|-----------|-----------|
| C | 9.930337  | 13.016864 | 10.475000 | C | 7.583807  | 5.144926  | 9.619530  |
| H | 9.337898  | 12.115598 | 10.644905 | H | 7.967775  | 5.054016  | 8.606639  |
| H | 10.474944 | 13.248780 | 11.397257 | C | 8.453045  | 4.996901  | 10.696340 |
| H | 10.662402 | 12.776535 | 9.697696  | H | 9.506113  | 4.791442  | 10.525604 |
| C | 4.656008  | 13.110657 | 7.640272  | C | 7.961407  | 5.108684  | 11.992557 |
| H | 4.298555  | 13.241424 | 8.667607  | H | 8.638159  | 4.979885  | 12.833636 |
| C | 4.346656  | 11.664582 | 7.228920  | C | 6.613471  | 5.393356  | 12.234908 |
| H | 4.700998  | 11.459339 | 6.211946  | C | 5.323529  | 5.657178  | 8.618000  |
| H | 3.268075  | 11.474145 | 7.263273  | H | 4.297927  | 5.740364  | 8.991060  |
| H | 4.818010  | 10.942666 | 7.901791  | C | 5.667076  | 6.980567  | 7.920774  |
| C | 3.902328  | 14.099690 | 6.744091  | H | 6.717092  | 6.997755  | 7.608956  |
| H | 4.075887  | 15.133166 | 7.060886  | H | 5.505092  | 7.829698  | 8.593596  |
| H | 2.825887  | 13.906691 | 6.775546  | H | 5.045339  | 7.133250  | 7.032006  |
| H | 4.218910  | 14.015195 | 5.699025  | C | 5.365719  | 4.484576  | 7.631928  |
| N | 4.442686  | 6.110350  | 11.327535 | H | 6.349079  | 4.384382  | 7.159502  |
| C | 3.387193  | 5.292038  | 11.347155 | H | 4.631239  | 4.633239  | 6.832879  |
| C | 2.069614  | 5.742842  | 11.180787 | H | 5.138353  | 3.538003  | 8.132833  |
| H | 1.283609  | 5.015798  | 11.354037 | C | 6.108710  | 5.521328  | 13.658613 |
| C | 1.641095  | 6.981813  | 10.641107 | H | 5.016091  | 5.591160  | 13.611030 |
| N | 2.479058  | 7.974380  | 10.359318 | C | 6.473177  | 4.295865  | 14.505266 |
| C | 3.615520  | 3.808277  | 11.510782 | H | 6.110832  | 3.370683  | 14.045321 |
| H | 4.127680  | 3.412440  | 10.626266 | H | 6.036468  | 4.376160  | 15.505520 |
| H | 2.676810  | 3.265340  | 11.635545 | H | 7.557242  | 4.201457  | 14.630187 |
| H | 4.265695  | 3.602677  | 12.367314 | C | 6.619831  | 6.807578  | 14.310849 |
| C | 0.163232  | 7.121530  | 10.363968 | H | 7.713989  | 6.831407  | 14.337284 |
| H | -0.133910 | 8.170454  | 10.361029 | H | 6.263160  | 6.885203  | 15.340497 |
| H | -0.409666 | 6.581116  | 11.121383 | H | 6.283287  | 7.699496  | 13.772699 |
| H | -0.102290 | 6.698838  | 9.389141  | C | -0.133321 | 12.644803 | 10.041511 |
| N | 1.973460  | 9.111537  | 9.705174  | C | -1.272757 | 12.191980 | 10.744985 |
| C | 1.688836  | 9.021303  | 8.410053  | C | -1.980871 | 13.100518 | 11.536012 |
| C | 1.044757  | 10.059690 | 7.691636  | H | -2.836597 | 12.754153 | 12.109501 |
| H | 0.869015  | 9.858617  | 6.640494  | C | -1.592565 | 14.433847 | 11.627361 |
| C | 0.465936  | 11.227186 | 8.211280  | H | -2.141762 | 15.121182 | 12.264615 |
| N | 0.725807  | 11.683731 | 9.439336  | C | -0.499129 | 14.878953 | 10.892211 |
| C | 2.024820  | 7.768286  | 7.637879  | H | -0.204308 | 15.923961 | 10.949326 |
| H | 2.880933  | 7.259731  | 8.082745  | C | 0.236486  | 14.003195 | 10.087557 |
| H | 2.247476  | 8.018729  | 6.598048  | C | -1.675994 | 10.727380 | 10.731613 |
| H | 1.188209  | 7.061718  | 7.634216  | H | -1.118897 | 10.234484 | 9.928585  |
| C | -0.524753 | 11.973345 | 7.349791  | C | -3.168891 | 10.530451 | 10.447501 |
| H | -1.529834 | 11.887604 | 7.778536  | H | -3.794782 | 10.920820 | 11.257347 |
| H | -0.551525 | 11.581803 | 6.331212  | H | -3.397031 | 9.464161  | 10.343502 |
| H | -0.287546 | 13.041894 | 7.318236  | H | -3.466210 | 11.035238 | 9.522575  |
| C | 5.751990  | 5.588960  | 11.137620 | C | -1.268528 | 10.059154 | 12.051168 |
| C | 6.231291  | 5.434969  | 9.816290  | H | -0.179867 | 10.072785 | 12.171172 |



|   |           |           |           |    |           |           |           |
|---|-----------|-----------|-----------|----|-----------|-----------|-----------|
| H | 11.243153 | 14.261185 | 4.357433  | H  | 8.660667  | 9.703481  | 4.840213  |
| H | 11.102203 | 14.820578 | 6.035649  | H  | 7.329973  | 9.969276  | 3.716688  |
| H | 9.729481  | 14.046459 | 5.215881  | C  | 7.020546  | 12.710378 | 4.202597  |
| C | 14.046343 | 5.454969  | 9.272302  | H  | 6.425161  | 12.379403 | 3.344710  |
| C | 14.162961 | 5.429699  | 10.683902 | H  | 7.320498  | 13.747950 | 4.023215  |
| C | 13.983388 | 4.213227  | 11.346320 | H  | 6.363656  | 12.689775 | 5.078512  |
| H | 14.072785 | 4.173345  | 12.426653 | O  | 11.310144 | 8.151953  | 9.831033  |
| C | 13.679104 | 3.047227  | 10.649748 | C  | 11.028696 | 6.919018  | 10.483236 |
| H | 13.547761 | 2.110592  | 11.184606 | H  | 11.417058 | 6.016422  | 10.021274 |
| C | 13.518041 | 3.095333  | 9.272352  | C  | 10.586435 | 6.940844  | 11.770772 |
| H | 13.252945 | 2.190425  | 8.732602  | H  | 10.386061 | 5.983858  | 12.254386 |
| C | 14.465248 | 6.700158  | 11.462967 | N  | 10.403923 | 8.093081  | 12.470848 |
| H | 13.939472 | 7.517819  | 10.950566 | C  | 9.771688  | 7.961916  | 13.730966 |
| C | 13.958855 | 6.654565  | 12.904017 | C  | 8.416812  | 7.556434  | 13.795595 |
| H | 12.897852 | 6.399011  | 12.952353 | C  | 7.805493  | 7.394134  | 15.041017 |
| H | 14.087539 | 7.634770  | 13.365760 | H  | 6.763236  | 7.084153  | 15.080857 |
| H | 14.523741 | 5.938738  | 13.511976 | C  | 8.507225  | 7.630024  | 16.220370 |
| C | 15.963662 | 7.040402  | 11.462269 | H  | 8.021228  | 7.501616  | 17.183820 |
| H | 16.548798 | 6.193079  | 11.837050 | C  | 9.830312  | 8.055099  | 16.151402 |
| H | 16.156138 | 7.899599  | 12.113084 | H  | 10.383262 | 8.258824  | 17.066094 |
| H | 16.326774 | 7.295331  | 10.466413 | C  | 10.476673 | 8.232432  | 14.922738 |
| C | 10.664134 | 11.801849 | 3.701215  | C  | 7.642025  | 7.307993  | 12.531116 |
| C | 11.672618 | 11.819869 | 2.708264  | H  | 7.770840  | 6.283459  | 12.162859 |
| C | 11.284921 | 12.027237 | 1.381294  | H  | 7.985783  | 7.960365  | 11.726353 |
| H | 12.038173 | 12.050328 | 0.600468  | H  | 6.570719  | 7.470958  | 12.679234 |
| C | 9.944826  | 12.182271 | 1.036080  | C  | 11.913652 | 8.668319  | 14.910214 |
| H | 9.666347  | 12.339634 | -0.002504 | H  | 12.088597 | 9.459305  | 15.643222 |
| C | 8.961714  | 12.112912 | 2.018322  | H  | 12.206759 | 9.046636  | 13.931941 |
| H | 7.917658  | 12.213122 | 1.736445  | H  | 12.575905 | 7.829478  | 15.152014 |
| C | 9.301275  | 11.922977 | 3.360436  | Mg | 9.587472  | 7.942588  | 8.638024  |
| C | 13.135623 | 11.602895 | 3.077649  | Mg | 10.763109 | 9.665120  | 11.244381 |
| H | 13.149285 | 10.832953 | 3.860638  | N  | 7.935567  | 6.756365  | 8.387764  |
| C | 13.788007 | 12.861507 | 3.669938  | C  | 6.727248  | 7.109007  | 8.841077  |
| H | 13.706879 | 13.700282 | 2.969092  | C  | 6.422041  | 8.337635  | 9.460261  |
| H | 14.852641 | 12.679837 | 3.855369  | H  | 5.400686  | 8.430499  | 9.812825  |
| H | 13.337258 | 13.153123 | 4.619603  | C  | 7.273075  | 9.407319  | 9.803840  |
| C | 13.990236 | 11.080180 | 1.922226  | N  | 8.537981  | 9.461919  | 9.399650  |
| H | 13.533765 | 10.213839 | 1.440646  | C  | 5.561794  | 6.142066  | 8.757282  |
| H | 14.970078 | 10.773546 | 2.301672  | H  | 5.759646  | 5.304149  | 8.088489  |
| H | 14.164033 | 11.854007 | 1.165034  | H  | 4.657573  | 6.656633  | 8.421697  |
| C | 8.236786  | 11.812191 | 4.437740  | H  | 5.352100  | 5.743129  | 9.754806  |
| H | 8.698891  | 12.127295 | 5.375909  | C  | 6.747911  | 10.474912 | 10.727948 |
| C | 7.805598  | 10.352948 | 4.625731  | H  | 7.308482  | 10.436607 | 11.668933 |
| H | 7.098273  | 10.251160 | 5.455793  | H  | 5.688812  | 10.327976 | 10.943608 |

|   |           |           |           |   |           |           |           |
|---|-----------|-----------|-----------|---|-----------|-----------|-----------|
| H | 6.895221  | 11.480651 | 10.325272 | C | 11.570519 | 11.786361 | 13.228235 |
| N | 9.375495  | 10.445197 | 9.971684  | C | 10.567864 | 11.822893 | 14.226222 |
| C | 9.487009  | 11.612717 | 9.355499  | C | 10.965560 | 12.030568 | 15.550171 |
| C | 10.263383 | 12.660666 | 9.896641  | H | 10.216821 | 12.066739 | 16.334803 |
| H | 10.268714 | 13.580883 | 9.326997  | C | 12.309086 | 12.171157 | 15.887293 |
| C | 10.949448 | 12.676097 | 11.118931 | H | 12.595107 | 12.330509 | 16.923544 |
| N | 11.164035 | 11.587105 | 11.874617 | C | 13.285951 | 12.083793 | 14.900344 |
| C | 8.770515  | 11.837600 | 8.051814  | H | 14.332661 | 12.172031 | 15.176115 |
| H | 9.093906  | 11.081465 | 7.327480  | C | 12.936739 | 11.889939 | 13.561436 |
| H | 8.995263  | 12.823474 | 7.645129  | C | 9.099508  | 11.629566 | 13.865265 |
| H | 7.687183  | 11.726634 | 8.152933  | H | 9.068941  | 10.857262 | 13.085255 |
| C | 11.449538 | 14.020786 | 11.600769 | C | 8.465248  | 12.897505 | 13.273181 |
| H | 11.028928 | 14.257174 | 12.583025 | H | 8.563849  | 13.736242 | 13.971886 |
| H | 11.178170 | 14.816893 | 10.905637 | H | 7.396732  | 12.733271 | 13.093807 |
| H | 12.537696 | 14.017121 | 11.722832 | H | 8.915632  | 13.180178 | 12.320632 |
| C | 8.107495  | 5.503472  | 7.719618  | C | 8.242424  | 11.125349 | 15.026813 |
| C | 8.003050  | 5.475306  | 6.306885  | H | 8.687009  | 10.253424 | 15.509036 |
| C | 8.174462  | 4.254755  | 5.649467  | H | 7.255570  | 10.834000 | 14.653527 |
| H | 8.092785  | 4.212246  | 4.568614  | H | 8.085621  | 11.904919 | 15.781904 |
| C | 8.459550  | 3.087861  | 6.352278  | C | 13.992671 | 11.755501 | 12.478814 |
| H | 8.583658  | 2.147867  | 5.821636  | H | 13.535602 | 12.089826 | 11.545111 |
| C | 8.612990  | 3.139109  | 7.730531  | C | 14.379377 | 10.285277 | 12.281143 |
| H | 8.866348  | 2.233525  | 8.274459  | H | 15.072598 | 10.165111 | 11.441796 |
| C | 8.460935  | 4.338626  | 8.436289  | H | 13.503424 | 9.659790  | 12.078821 |
| C | 7.721101  | 6.746034  | 5.520190  | H | 14.856313 | 9.887384  | 13.183198 |
| H | 8.243372  | 7.563299  | 6.036852  | C | 15.236281 | 12.615646 | 12.711733 |
| C | 8.250836  | 6.694708  | 4.087558  | H | 15.826051 | 12.262734 | 13.564768 |
| H | 9.312768  | 6.439100  | 4.056329  | H | 14.968735 | 13.660993 | 12.897361 |
| H | 8.128005  | 7.672647  | 3.619254  | H | 15.887618 | 12.579350 | 11.832184 |
| H | 7.696751  | 5.976287  | 3.472980  | O | 10.802049 | 8.213580  | 7.081462  |
| C | 6.225251  | 7.094942  | 5.498049  | C | 11.166047 | 6.954910  | 6.522378  |
| H | 5.641503  | 6.252821  | 5.109727  | H | 10.695336 | 6.069332  | 6.944236  |
| H | 6.047936  | 7.958951  | 4.849229  | C | 11.653273 | 6.938019  | 5.240765  |
| H | 5.848693  | 7.345721  | 6.489878  | H | 11.890378 | 5.968698  | 4.800245  |
| C | 8.686686  | 4.347756  | 9.937662  | N | 11.836019 | 8.062641  | 4.515318  |
| H | 8.760629  | 5.395334  | 10.247606 | C | 12.462986 | 7.909927  | 3.253689  |
| C | 7.520940  | 3.699356  | 10.695486 | C | 13.809059 | 7.478950  | 3.183921  |
| H | 6.573191  | 4.199139  | 10.485675 | C | 14.408977 | 7.305604  | 1.934377  |
| H | 7.412632  | 2.646150  | 10.411515 | H | 15.445168 | 6.977040  | 1.888652  |
| H | 7.695145  | 3.739461  | 11.776679 | C | 13.705039 | 7.553438  | 0.758952  |
| C | 10.002174 | 3.653354  | 10.316238 | H | 14.183295 | 7.415550  | -0.206969 |
| H | 10.847440 | 4.010320  | 9.722379  | C | 12.390273 | 8.001803  | 0.834779  |
| H | 10.237002 | 3.821992  | 11.372079 | H | 11.835647 | 8.215020  | -0.076626 |
| H | 9.944507  | 2.569057  | 10.171101 | C | 11.754888 | 8.192547  | 2.066907  |

|   |           |          |          |   |           |          |           |
|---|-----------|----------|----------|---|-----------|----------|-----------|
| C | 14.590864 | 7.216517 | 4.441723 | N | 7.588011  | 3.986081 | 6.402905  |
| H | 14.464534 | 6.187834 | 4.799723 | C | 8.360992  | 4.940297 | 5.903832  |
| H | 14.258576 | 7.862677 | 5.255588 | C | 8.257264  | 5.344256 | 4.544112  |
| H | 15.661274 | 7.378272 | 4.286025 | H | 9.034618  | 6.027788 | 4.220154  |
| C | 10.327552 | 8.660064 | 2.085330 | C | 7.277808  | 5.055759 | 3.582616  |
| H | 10.177776 | 9.487295 | 1.387424 | N | 6.156806  | 4.349749 | 3.816443  |
| H | 10.031037 | 9.000556 | 3.076157 | C | 9.349217  | 5.693928 | 6.757793  |
| H | 9.648946  | 7.848357 | 1.800015 | H | 9.082946  | 5.634115 | 7.815354  |
| C | 13.679439 | 4.291038 | 8.562037 | H | 9.370072  | 6.743717 | 6.456838  |
| C | 13.447652 | 4.295770 | 7.061650 | H | 10.361751 | 5.294983 | 6.637498  |
| H | 13.424268 | 5.342433 | 6.741566 | C | 7.509472  | 5.602751 | 2.191717  |
| C | 12.097349 | 3.661686 | 6.701096 | H | 8.314038  | 6.339771 | 2.180752  |
| H | 11.273971 | 4.081018 | 7.284443 | H | 6.601567  | 6.056542 | 1.785131  |
| H | 11.869031 | 3.808776 | 5.640442 | H | 7.783356  | 4.789574 | 1.510572  |
| H | 12.097175 | 2.581166 | 6.880714 | C | 5.020843  | 3.609722 | 11.183205 |
| C | 14.576637 | 3.583726 | 6.305281 | C | 4.716569  | 4.962656 | 11.468938 |
| H | 15.550497 | 4.030808 | 6.516382 | C | 3.616403  | 5.236374 | 12.284952 |
| H | 14.627665 | 2.526334 | 6.589432 | H | 3.367763  | 6.266108 | 12.521356 |
| H | 14.406079 | 3.632064 | 5.223778 | C | 2.814088  | 4.211975 | 12.781709 |

3-monomer.log

SCF (B3PW91) = -2062.59140462

E(SCF)+ZPE(0 K)= -2061.640764

H(298 K)= -2061.585413

G(298 K)= -2061.723944

Lowest Frequency = 22.5938cm<sup>-1</sup>

|    |           |          |           |
|----|-----------|----------|-----------|
| Mg | 5.586324  | 3.304449 | 8.348277  |
| Mg | 5.754440  | 3.541126 | 5.607684  |
| N  | 6.083803  | 3.337401 | 10.279281 |
| C  | 7.309542  | 2.990421 | 10.694849 |
| C  | 8.406515  | 2.829146 | 9.833571  |
| H  | 9.308377  | 2.434136 | 10.289203 |
| C  | 8.524994  | 3.135001 | 8.448982  |
| N  | 7.528797  | 3.696134 | 7.774804  |
| C  | 7.518869  | 2.701272 | 12.163121 |
| H  | 7.028282  | 1.759291 | 12.432399 |
| H  | 7.061171  | 3.478904 | 12.781455 |
| H  | 8.578007  | 2.624948 | 12.414542 |
| C  | 9.828947  | 2.769002 | 7.784347  |
| H  | 9.731110  | 2.750806 | 6.697274  |
| H  | 10.149386 | 1.782327 | 8.128612  |
| H  | 10.618404 | 3.479582 | 8.049606  |

|   |          |           |           |
|---|----------|-----------|-----------|
| H | 1.960348 | 4.446992  | 13.411698 |
| C | 3.090791 | 2.891796  | 12.445762 |
| H | 2.438100 | 2.099553  | 12.803290 |
| C | 4.186882 | 2.567519  | 11.639837 |
| C | 5.554843 | 6.080619  | 10.867732 |
| H | 5.866428 | 5.739626  | 9.871612  |
| C | 4.780275 | 7.385254  | 10.678954 |
| H | 3.836106 | 7.218747  | 10.154315 |
| H | 5.372307 | 8.083589  | 10.079791 |
| H | 4.568633 | 7.875711  | 11.636423 |
| C | 6.838186 | 6.327918  | 11.673382 |
| H | 6.596904 | 6.587042  | 12.710648 |
| H | 7.406294 | 7.158725  | 11.239918 |
| H | 7.487903 | 5.449941  | 11.680598 |
| C | 4.412549 | 1.132141  | 11.197192 |
| H | 5.394859 | 1.083216  | 10.715026 |
| C | 4.417786 | 0.143097  | 12.368209 |
| H | 5.137571 | 0.439498  | 13.137776 |
| H | 4.682702 | -0.860563 | 12.019323 |
| H | 3.433348 | 0.075086  | 12.843794 |
| C | 3.364828 | 0.728530  | 10.147165 |
| H | 3.377467 | 1.393449  | 9.275690  |
| H | 2.355617 | 0.768683  | 10.572007 |
| H | 3.545031 | -0.290791 | 9.788913  |
| C | 5.214587 | 4.143060  | 2.764898  |

|   |          |          |           |
|---|----------|----------|-----------|
| C | 5.430700 | 3.115182 | 1.821187  |
| C | 4.474173 | 2.910120 | 0.822644  |
| H | 4.626959 | 2.122951 | 0.089373  |
| C | 3.322701 | 3.687646 | 0.761182  |
| H | 2.592325 | 3.519750 | -0.025825 |
| C | 3.096011 | 4.664002 | 1.726936  |
| H | 2.179691 | 5.245326 | 1.690487  |
| C | 4.019547 | 4.900961 | 2.749022  |
| C | 6.626537 | 2.184955 | 1.941740  |
| H | 7.365469 | 2.667888 | 2.588415  |
| C | 7.306031 | 1.889380 | 0.600903  |
| H | 7.569723 | 2.811842 | 0.073531  |
| H | 6.663273 | 1.299521 | -0.061506 |
| H | 8.223115 | 1.312582 | 0.760095  |
| C | 6.199775 | 0.882500 | 2.637117  |
| H | 5.751799 | 1.078232 | 3.617637  |
| H | 7.057749 | 0.217071 | 2.784139  |
| H | 5.453557 | 0.351216 | 2.035635  |
| C | 3.746707 | 5.938765 | 3.825389  |
| H | 4.198395 | 5.567580 | 4.750363  |
| C | 2.261878 | 6.148544 | 4.130757  |
| H | 1.749175 | 6.692025 | 3.328760  |
| H | 2.160271 | 6.735427 | 5.049184  |
| H | 1.743654 | 5.195252 | 4.275900  |
| C | 4.421776 | 7.280148 | 3.514797  |
| H | 5.506031 | 7.173073 | 3.429628  |
| H | 4.216706 | 7.996747 | 4.317304  |
| H | 4.042140 | 7.693943 | 2.573688  |
| O | 5.249462 | 1.980454 | 6.838856  |
| C | 3.975961 | 2.182207 | 6.362441  |
| H | 3.465128 | 1.362684 | 5.865407  |
| C | 3.468081 | 3.436337 | 6.501641  |
| H | 2.503890 | 3.728747 | 6.099402  |
| N | 4.310894 | 4.395028 | 7.110471  |
| C | 3.714855 | 5.632902 | 7.436903  |
| C | 4.404563 | 6.834156 | 7.155952  |
| C | 3.756837 | 8.055064 | 7.349600  |
| H | 4.285350 | 8.972636 | 7.101092  |
| C | 2.462911 | 8.114286 | 7.862525  |
| H | 1.966216 | 9.071053 | 7.995461  |
| C | 1.846437 | 6.935689 | 8.272264  |
| H | 0.877531 | 6.974338 | 8.765429  |
| C | 2.465724 | 5.692913 | 8.102714  |
| C | 5.830878 | 6.795851 | 6.692812  |

|   |          |          |          |
|---|----------|----------|----------|
| H | 6.447475 | 6.215606 | 7.388351 |
| H | 6.250400 | 7.802910 | 6.625479 |
| H | 5.946002 | 6.328942 | 5.709899 |
| C | 1.860041 | 4.466211 | 8.737398 |
| H | 1.314960 | 3.822402 | 8.039374 |
| H | 1.168886 | 4.755889 | 9.533414 |
| H | 2.642450 | 3.848439 | 9.195307 |

3-THF.log

SCF (B3PW91) = -2527.44192456

E(SCF)+ZPE(0 K)= -2526.251995

H(298 K)= -2526.184255

G(298 K)= -2526.350508

Lowest Frequency = 16.1904cm-1

|    |           |          |           |
|----|-----------|----------|-----------|
| Mg | 5.438766  | 4.262309 | 8.179553  |
| Mg | 5.831814  | 2.714841 | 5.238679  |
| N  | 5.993693  | 3.617857 | 10.055977 |
| C  | 7.134721  | 2.993419 | 10.365324 |
| C  | 8.196331  | 2.784679 | 9.466178  |
| H  | 9.053693  | 2.251002 | 9.860406  |
| C  | 8.266622  | 3.123100 | 8.093078  |
| N  | 7.320655  | 3.825996 | 7.494036  |
| C  | 7.302474  | 2.409649 | 11.752127 |
| H  | 6.674284  | 1.518394 | 11.860305 |
| H  | 6.977878  | 3.114285 | 12.522015 |
| H  | 8.338477  | 2.124457 | 11.943969 |
| C  | 9.438930  | 2.614335 | 7.292946  |
| H  | 9.079994  | 2.198405 | 6.348135  |
| H  | 9.996834  | 1.854797 | 7.843782  |
| H  | 10.127660 | 3.425969 | 7.035988  |
| N  | 7.352436  | 3.935553 | 6.084685  |
| C  | 7.914941  | 5.020384 | 5.586918  |
| C  | 7.841995  | 5.332104 | 4.210063  |
| H  | 8.419226  | 6.194248 | 3.897803  |
| C  | 7.084584  | 4.712962 | 3.212325  |
| N  | 6.252311  | 3.666902 | 3.392260  |
| C  | 8.632767  | 5.988084 | 6.494300  |
| H  | 7.951958  | 6.331606 | 7.278446  |
| H  | 8.998501  | 6.854208 | 5.940839  |
| H  | 9.476481  | 5.515486 | 7.005142  |
| C  | 7.238337  | 5.307140 | 1.824976  |
| H  | 7.739495  | 6.275387 | 1.867724  |

|   |          |           |           |   |          |           |           |
|---|----------|-----------|-----------|---|----------|-----------|-----------|
| H | 6.274984 | 5.431505  | 1.324621  | H | 7.973365 | 1.326874  | -0.622171 |
| H | 7.837109 | 4.645550  | 1.190967  | H | 9.383285 | 1.687878  | 0.375023  |
| C | 4.986072 | 3.754037  | 11.055418 | C | 7.449063 | 0.416321  | 1.927914  |
| C | 4.858736 | 4.987690  | 11.735815 | H | 6.852717 | 0.333815  | 2.841048  |
| C | 3.846076 | 5.115036  | 12.690380 | H | 8.453338 | 0.027834  | 2.131637  |
| H | 3.728007 | 6.052322  | 13.223344 | H | 6.980973 | -0.227498 | 1.174563  |
| C | 2.965329 | 4.070864  | 12.957181 | C | 3.530338 | 4.581665  | 3.163639  |
| H | 2.182681 | 4.196171  | 13.700632 | H | 3.956200 | 4.323555  | 4.139087  |
| C | 3.071494 | 2.881023  | 12.247660 | C | 2.015572 | 4.416878  | 3.292634  |
| H | 2.358116 | 2.081815  | 12.430758 | H | 1.478907 | 4.822620  | 2.427487  |
| C | 4.072266 | 2.703843  | 11.288079 | H | 1.669343 | 4.956565  | 4.178989  |
| C | 5.783577 | 6.151117  | 11.407955 | H | 1.732680 | 3.365172  | 3.405285  |
| H | 5.870974 | 6.172997  | 10.313005 | C | 3.879813 | 6.057524  | 2.923901  |
| C | 5.226501 | 7.506815  | 11.841396 | H | 4.953440 | 6.235894  | 3.010344  |
| H | 4.199325 | 7.648818  | 11.500160 | H | 3.381233 | 6.684438  | 3.670819  |
| H | 5.831923 | 8.309316  | 11.409418 | H | 3.551438 | 6.379749  | 1.928906  |
| H | 5.258317 | 7.623020  | 12.931777 | O | 4.564714 | 3.243775  | 6.668159  |
| C | 7.197708 | 5.968506  | 11.979544 | C | 3.304010 | 3.788523  | 6.500695  |
| H | 7.157131 | 5.825748  | 13.065649 | H | 2.631390 | 3.298440  | 5.804038  |
| H | 7.800522 | 6.862155  | 11.781538 | C | 2.964034 | 4.901537  | 7.190715  |
| H | 7.716980 | 5.116971  | 11.536964 | H | 1.978428 | 5.342798  | 7.042322  |
| C | 4.115145 | 1.434657  | 10.456341 | N | 3.871611 | 5.525389  | 8.034587  |
| H | 5.092452 | 1.399840  | 9.967277  | C | 3.446567 | 6.677117  | 8.696410  |
| C | 3.970633 | 0.155072  | 11.285945 | C | 4.197947 | 7.868433  | 8.542958  |
| H | 4.696836 | 0.122662  | 12.104578 | C | 3.751986 | 9.051726  | 9.132170  |
| H | 4.128836 | -0.725716 | 10.653500 | H | 4.326352 | 9.964618  | 8.986049  |
| H | 2.971073 | 0.063881  | 11.724554 | C | 2.586457 | 9.079308  | 9.896861  |
| C | 3.046661 | 1.498659  | 9.354761  | H | 2.245726 | 10.007625 | 10.347534 |
| H | 3.182768 | 2.366947  | 8.701013  | C | 1.886727 | 7.892919  | 10.109046 |
| H | 2.046324 | 1.571572  | 9.795802  | H | 1.007770 | 7.891947  | 10.751532 |
| H | 3.073666 | 0.595029  | 8.732745  | C | 2.304284 | 6.687137  | 9.537250  |
| C | 5.508903 | 3.257817  | 2.247709  | C | 5.467775 | 7.833662  | 7.740330  |
| C | 6.091459 | 2.409276  | 1.278811  | H | 6.237375 | 7.245731  | 8.260812  |
| C | 5.316326 | 1.991711  | 0.191655  | H | 5.876082 | 8.836690  | 7.583376  |
| H | 5.752159 | 1.330697  | -0.552841 | H | 5.314183 | 7.349918  | 6.769764  |
| C | 3.992451 | 2.395124  | 0.057367  | C | 1.600972 | 5.399881  | 9.873202  |
| H | 3.402357 | 2.061737  | -0.791962 | H | 0.912592 | 5.068411  | 9.086971  |
| C | 3.424614 | 3.225479  | 1.020322  | H | 1.028970 | 5.501026  | 10.799792 |
| H | 2.389193 | 3.532086  | 0.908943  | H | 2.335457 | 4.599298  | 10.010104 |
| C | 4.159044 | 3.669510  | 2.124189  | O | 4.344651 | 1.234281  | 4.532533  |
| C | 7.503348 | 1.872259  | 1.445051  | C | 4.084652 | 0.482555  | 3.331074  |
| H | 7.992647 | 2.458441  | 2.229002  | H | 4.568640 | -0.500505 | 3.429639  |
| C | 8.348494 | 1.982625  | 0.171083  | H | 4.520203 | 1.015885  | 2.492476  |
| H | 8.356512 | 3.003825  | -0.221717 | C | 2.561935 | 0.355234  | 3.269226  |

|   |          |           |          |
|---|----------|-----------|----------|
| H | 2.150793 | 1.150358  | 2.643110 |
| H | 2.261106 | -0.602603 | 2.836965 |
| C | 2.118868 | 0.514111  | 4.742228 |
| H | 1.542216 | -0.338897 | 5.109122 |
| H | 1.505762 | 1.409806  | 4.872222 |
| C | 3.437164 | 0.662007  | 5.497973 |
| H | 3.407807 | 1.325173  | 6.358780 |
| H | 3.830665 | -0.316903 | 5.802544 |
| O | 6.659590 | 1.047770  | 6.257881 |
| C | 7.424850 | -0.063176 | 5.780341 |
| H | 8.399831 | -0.073456 | 6.287360 |
| H | 7.582447 | 0.072300  | 4.709997 |
| C | 6.583178 | -1.271787 | 6.158776 |
| H | 7.164222 | -2.196614 | 6.193142 |
| H | 5.782258 | -1.399169 | 5.423874 |
| C | 6.013346 | -0.864195 | 7.532315 |
| H | 6.600689 | -1.301395 | 8.344373 |
| H | 4.979921 | -1.196019 | 7.662238 |
| C | 6.131691 | 0.669578  | 7.553792 |
| H | 5.189837 | 1.204683  | 7.665132 |
| H | 6.830078 | 1.020018  | 8.319928 |

4a.log

SCF (B3PW91) = -1522.85454433

E(SCF)+ZPE(0 K)= -1522.195879

H(298 K)= -1522.155645

G(298 K)= -1522.266143

Lowest Frequency = 20.4666cm-1

|    |          |          |          |
|----|----------|----------|----------|
| Al | 3.290883 | 4.927952 | 5.651605 |
| N  | 2.039059 | 3.668369 | 4.997871 |
| C  | 2.099892 | 3.121448 | 3.775765 |
| C  | 3.190164 | 3.300051 | 2.912742 |
| H  | 3.128906 | 2.804437 | 1.951828 |
| C  | 4.409504 | 3.929611 | 3.209532 |
| N  | 4.611566 | 4.644819 | 4.324350 |
| C  | 0.980558 | 2.219525 | 3.329468 |
| H  | 0.996516 | 1.281735 | 3.894552 |
| H  | 1.062554 | 1.984947 | 2.267300 |
| H  | 0.010123 | 2.685103 | 3.524100 |
| C  | 5.544267 | 3.763154 | 2.236173 |
| H  | 5.752689 | 4.701645 | 1.715155 |
| H  | 5.315293 | 2.999247 | 1.492368 |

|   |           |          |          |
|---|-----------|----------|----------|
| H | 6.459115  | 3.484937 | 2.767905 |
| C | 1.091307  | 3.137934 | 5.942417 |
| C | 1.429106  | 1.958848 | 6.630242 |
| C | 0.518552  | 1.444622 | 7.552907 |
| H | 0.772136  | 0.531311 | 8.087517 |
| C | -0.698500 | 2.078742 | 7.820272 |
| C | -0.989508 | 3.261604 | 7.139980 |
| H | -1.926064 | 3.777433 | 7.341715 |
| C | -0.107126 | 3.812161 | 6.205835 |
| C | 2.764288  | 1.302820 | 6.408869 |
| H | 2.941684  | 1.055874 | 5.356325 |
| H | 2.851214  | 0.382314 | 6.991306 |
| H | 3.565006  | 1.982668 | 6.720596 |
| C | -1.647298 | 1.518052 | 8.846631 |
| H | -2.666478 | 1.885506 | 8.695846 |
| H | -1.340511 | 1.805793 | 9.859516 |
| H | -1.671730 | 0.424152 | 8.814351 |
| C | -0.413332 | 5.111040 | 5.518768 |
| H | 0.295328  | 5.881905 | 5.842005 |
| H | -1.424570 | 5.455201 | 5.749298 |
| H | -0.315250 | 5.029436 | 4.431163 |
| C | 5.882200  | 5.273290 | 4.568468 |
| C | 6.225208  | 6.470369 | 3.918693 |
| C | 7.418021  | 7.101350 | 4.284214 |
| H | 7.673056  | 8.042384 | 3.801155 |
| C | 8.268897  | 6.576970 | 5.254895 |
| C | 7.918805  | 5.362859 | 5.853065 |
| H | 8.580578  | 4.923807 | 6.596751 |
| C | 6.737574  | 4.696319 | 5.528416 |
| C | 5.373585  | 7.090328 | 2.846658 |
| H | 5.847991  | 6.978192 | 1.863775 |
| H | 5.247456  | 8.159616 | 3.030572 |
| H | 4.378266  | 6.647377 | 2.797945 |
| C | 9.512902  | 7.312870 | 5.675249 |
| H | 10.307352 | 6.622668 | 5.975180 |
| H | 9.304716  | 7.962497 | 6.534285 |
| H | 9.896994  | 7.947346 | 4.871065 |
| C | 6.386161  | 3.390662 | 6.189880 |
| H | 5.589014  | 3.530358 | 6.930588 |
| H | 7.254315  | 2.970135 | 6.703858 |
| H | 6.028488  | 2.654813 | 5.461860 |
| O | 3.507344  | 4.517531 | 7.378405 |
| C | 3.100534  | 5.607549 | 8.102786 |
| H | 2.996368  | 5.466762 | 9.173998 |



|   |          |           |          |
|---|----------|-----------|----------|
| C | 2.824302 | 6.748424  | 7.439790 |
| H | 2.495720 | 7.665694  | 7.918400 |
| N | 2.939083 | 6.711118  | 6.025615 |
| C | 3.308014 | 7.896681  | 5.358360 |
| C | 2.580108 | 8.313531  | 4.220927 |
| C | 2.917679 | 9.511265  | 3.587664 |
| H | 2.342928 | 9.828297  | 2.720203 |
| C | 3.969093 | 10.299454 | 4.049847 |
| H | 4.215663 | 11.234020 | 3.553432 |
| C | 4.720067 | 9.858034  | 5.136017 |
| H | 5.576506 | 10.438430 | 5.472792 |
| C | 4.423831 | 8.657665  | 5.788992 |
| C | 1.449530 | 7.476486  | 3.692194 |
| H | 1.755376 | 6.440628  | 3.499856 |
| H | 1.062379 | 7.887271  | 2.755369 |
| H | 0.627312 | 7.428827  | 4.411283 |
| C | 5.344744 | 8.149766  | 6.865682 |
| H | 4.918261 | 8.236498  | 7.869644 |
| H | 6.292716 | 8.694305  | 6.843456 |
| H | 5.562421 | 7.087661  | 6.710039 |

cis-enamidolate-dianion.log

SCF (B3PW91) = -517.528281725  
 E(SCF)+ZPE(0 K)= -517.345281  
 H(298 K)= -517.333251  
 G(298 K)= -517.381711  
 Lowest Frequency = 77.6416cm<sup>-1</sup>

|   |          |          |           |
|---|----------|----------|-----------|
| O | 9.924148 | 8.021993 | 8.213131  |
| C | 8.636485 | 7.910792 | 8.011309  |
| H | 8.161297 | 8.700971 | 7.372444  |
| C | 7.709913 | 6.996058 | 8.450255  |
| H | 6.679420 | 7.197122 | 8.117772  |
| N | 7.915779 | 5.791538 | 9.143667  |
| C | 6.981539 | 5.355258 | 9.992837  |
| C | 5.970506 | 6.154155 | 10.689606 |
| C | 4.971188 | 5.530988 | 11.432045 |
| H | 4.237672 | 6.169395 | 11.934936 |
| C | 4.897740 | 4.143544 | 11.614354 |
| H | 4.097540 | 3.687497 | 12.194115 |
| C | 5.945686 | 3.376197 | 11.074921 |
| H | 5.963958 | 2.296293 | 11.246407 |
| C | 6.966810 | 3.936471 | 10.325596 |

|   |          |          |           |
|---|----------|----------|-----------|
| C | 6.112568 | 7.654259 | 10.803529 |
| H | 5.947139 | 8.209378 | 9.873810  |
| H | 7.137178 | 7.915381 | 11.101027 |
| H | 5.427251 | 8.042174 | 11.571845 |
| C | 8.066478 | 3.078665 | 9.771399  |
| H | 7.957317 | 2.030777 | 10.084617 |
| H | 9.054177 | 3.440234 | 10.088044 |
| H | 8.090324 | 3.124429 | 8.673633  |

CN-Xyl.log

SCF (B3PW91) = -402.968707697  
 E(SCF)+ZPE(0 K)= -402.814294  
 H(298 K)= -402.803844  
 G(298 K)= -402.848557  
 Lowest Frequency = 110.6830cm<sup>-1</sup>

|   |           |           |           |
|---|-----------|-----------|-----------|
| C | -0.618805 | 0.938834  | 0.000261  |
| C | 0.786939  | 0.900061  | 0.000663  |
| C | 1.460599  | 2.122266  | -0.000022 |
| C | 0.759770  | 3.326319  | -0.001049 |
| C | -0.633372 | 3.331386  | -0.001411 |
| C | -1.355095 | 2.136941  | -0.000765 |
| H | 2.546960  | 2.125273  | 0.000253  |
| H | 1.302927  | 4.266932  | -0.001566 |
| H | -1.173977 | 4.273700  | -0.002206 |
| C | -1.900171 | -1.279428 | 0.001435  |
| N | -1.311193 | -0.260134 | 0.000901  |
| C | -2.855847 | 2.110320  | -0.001140 |
| H | -3.240383 | 1.581538  | -0.880300 |
| H | -3.240845 | 1.582640  | 0.878479  |
| H | -3.266251 | 3.122458  | -0.001883 |
| C | 1.513997  | -0.413113 | 0.001784  |
| H | 1.248450  | -1.009775 | 0.881491  |
| H | 1.249044  | -1.010951 | -0.877305 |
| H | 2.595801  | -0.262859 | 0.002052  |

CO.log

SCF (B3PW91) = -113.263433183  
 E(SCF)+ZPE(0 K)= -113.258397  
 H(298 K)= -113.255092  
 G(298 K)= -113.277533  
 Lowest Frequency = 2210.5326cm<sup>-1</sup>

C -3.727095 0.240642 0.000000  
 O -2.590660 0.240642 0.000000

INT-1.log

SCF (B3PW91) = -3898.53468373  
 E(SCF)+ZPE(0 K)= -3896.658673  
 H(298 K)= -3896.549830  
 G(298 K)= -3896.795899  
 Lowest Frequency = 14.2492cm<sup>-1</sup>

Mg 3.760901 10.498915 14.141688  
 Mg 5.544560 11.735419 10.985032  
 Mg 4.545326 8.439729 11.075395  
 Mg 2.293446 10.786901 10.658066  
 H 4.032958 9.573250 12.524427  
 H 4.629176 11.723239 8.947514  
 N 4.316497 9.927246 16.048545  
 C 5.579144 9.915197 16.496674  
 C 6.653150 10.541609 15.851109  
 H 7.628884 10.392749 16.297468  
 C 6.628425 11.337330 14.687781  
 N 5.512338 11.553530 14.003187  
 C 5.900538 9.159575 17.767841  
 H 5.229985 9.443388 18.583076  
 H 6.931366 9.328330 18.083000  
 H 5.758015 8.084565 17.606446  
 C 7.943359 11.903837 14.210882  
 H 8.242071 11.385462 13.293413  
 H 8.726563 11.754848 14.955412  
 H 7.888606 12.965922 13.963114  
 N 5.594633 12.426577 12.896766  
 C 5.535842 13.730016 13.176600  
 C 5.787068 14.728570 12.218173  
 H 5.633066 15.746572 12.557851  
 C 6.371121 14.594508 10.944233  
 N 6.548923 13.429214 10.311734  
 C 5.263064 14.172251 14.594325  
 H 4.535066 13.516924 15.079764  
 H 4.904390 15.202869 14.614089  
 H 6.175923 14.118617 15.198283  
 C 6.775638 15.891441 10.278534  
 H 7.608175 15.754221 9.586736

H 7.042942 16.653332 11.013451  
 H 5.922100 16.266896 9.702282  
 C 3.302646 9.452508 16.929086  
 C 2.627093 10.391401 17.744157  
 C 1.604867 9.923086 18.574032  
 H 1.063539 10.620403 19.204707  
 C 1.250234 8.576584 18.594830  
 H 0.449809 8.236797 19.246660  
 C 1.906743 7.671956 17.768300  
 H 1.604737 6.628407 17.770740  
 C 2.937406 8.090892 16.921510  
 C 2.987772 11.871162 17.687096  
 H 3.162276 12.105406 16.627338  
 C 1.866932 12.785171 18.182398  
 H 0.908677 12.536603 17.725373  
 H 2.098522 13.824508 17.929973  
 H 1.759138 12.731521 19.272476  
 C 4.280604 12.203576 18.449285  
 H 4.209751 11.866469 19.489774  
 H 4.438568 13.288018 18.458182  
 H 5.162485 11.750632 17.994788  
 C 3.580921 7.122492 15.945391  
 H 4.525330 7.563962 15.610581  
 C 3.898821 5.757241 16.560803  
 H 4.519938 5.855011 17.457271  
 H 4.435184 5.135761 15.836675  
 H 2.990169 5.213643 16.841024  
 C 2.694749 6.956039 14.704988  
 H 1.702467 6.582641 14.982839  
 H 3.135720 6.254878 13.992356  
 H 2.548453 7.898463 14.165634  
 C 7.466522 13.369827 9.210270  
 C 8.815912 13.049680 9.499660  
 C 9.725687 12.942154 8.447291  
 H 10.761982 12.697665 8.659206  
 C 9.325122 13.124870 7.128274  
 H 10.042139 13.020141 6.318707  
 C 8.001727 13.437398 6.854677  
 H 7.689999 13.585517 5.824140  
 C 7.056600 13.579481 7.877428  
 C 9.272962 12.852716 10.934243  
 H 8.410529 12.459631 11.482367  
 C 9.651642 14.183306 11.601786  
 H 10.456715 14.674979 11.043940

|   |           |           |           |   |           |           |           |
|---|-----------|-----------|-----------|---|-----------|-----------|-----------|
| H | 10.003719 | 14.009168 | 12.625138 | C | 6.428468  | 6.122806  | 11.162719 |
| H | 8.804182  | 14.869050 | 11.654889 | C | 6.952257  | 5.950400  | 9.857869  |
| C | 10.429704 | 11.860285 | 11.077339 | C | 8.323155  | 5.718146  | 9.721911  |
| H | 10.258113 | 10.955540 | 10.490994 | H | 8.750775  | 5.589615  | 8.733587  |
| H | 10.551309 | 11.573864 | 12.127519 | C | 9.163225  | 5.671433  | 10.831211 |
| H | 11.379721 | 12.298808 | 10.751714 | H | 10.227953 | 5.497673  | 10.699585 |
| C | 5.647957  | 14.010687 | 7.509534  | C | 8.638432  | 5.860576  | 12.103240 |
| H | 5.061299  | 14.040891 | 8.433974  | H | 9.302321  | 5.844126  | 12.963399 |
| C | 4.970138  | 13.022537 | 6.552699  | C | 7.271176  | 6.085687  | 12.292767 |
| H | 5.430038  | 13.055283 | 5.558841  | C | 6.045449  | 6.049349  | 8.637709  |
| H | 3.908020  | 13.266117 | 6.437602  | H | 5.401197  | 6.925781  | 8.794870  |
| H | 5.057730  | 12.000245 | 6.920647  | C | 6.809590  | 6.276668  | 7.334107  |
| C | 5.650403  | 15.415905 | 6.887652  | H | 7.353148  | 5.374798  | 7.026960  |
| H | 6.128145  | 16.152539 | 7.537678  | H | 7.516485  | 7.104135  | 7.417298  |
| H | 4.629505  | 15.752965 | 6.678494  | H | 6.105441  | 6.521442  | 6.533047  |
| H | 6.194774  | 15.414578 | 5.937066  | C | 5.123083  | 4.829995  | 8.483174  |
| N | 5.051570  | 6.457573  | 11.298595 | H | 5.712225  | 3.907155  | 8.431539  |
| C | 4.165865  | 5.492139  | 11.590993 | H | 4.547468  | 4.912680  | 7.554150  |
| C | 2.776238  | 5.665102  | 11.565486 | H | 4.409476  | 4.742244  | 9.303809  |
| H | 2.182066  | 4.833696  | 11.928705 | C | 6.738001  | 6.365777  | 13.686437 |
| C | 2.037935  | 6.763792  | 11.060580 | H | 5.646608  | 6.281405  | 13.656379 |
| N | 2.639668  | 7.842027  | 10.587458 | C | 7.256835  | 5.373469  | 14.732940 |
| C | 4.675635  | 4.122796  | 11.983675 | H | 7.060667  | 4.337324  | 14.438662 |
| H | 5.416631  | 3.763090  | 11.263858 | H | 6.772525  | 5.554369  | 15.697789 |
| H | 3.862855  | 3.397220  | 12.043686 | H | 8.336051  | 5.475355  | 14.889298 |
| H | 5.177130  | 4.162188  | 12.956587 | C | 7.064209  | 7.801952  | 14.107044 |
| C | 0.533247  | 6.652732  | 11.070289 | H | 8.139687  | 8.000026  | 14.038462 |
| H | 0.068353  | 7.634171  | 10.961731 | H | 6.757467  | 7.984591  | 15.138890 |
| H | 0.207611  | 6.197250  | 12.009675 | H | 6.549734  | 8.542946  | 13.486022 |
| H | 0.174507  | 6.012094  | 10.257719 | C | -0.061842 | 12.532808 | 9.996748  |
| N | 1.894600  | 8.849524  | 9.954618  | C | -1.318296 | 12.324830 | 10.617852 |
| C | 1.505945  | 8.632676  | 8.701644  | C | -1.936369 | 13.404501 | 11.251433 |
| C | 0.828115  | 9.608628  | 7.930528  | H | -2.889877 | 13.259497 | 11.749797 |
| H | 0.577629  | 9.309532  | 6.919028  | C | -1.343290 | 14.665507 | 11.278001 |
| C | 0.353379  | 10.864110 | 8.342043  | H | -1.837364 | 15.489291 | 11.785732 |
| N | 0.666088  | 11.415909 | 9.515884  | C | -0.116377 | 14.860013 | 10.655686 |
| C | 1.793198  | 7.311071  | 8.026909  | H | 0.347882  | 15.843180 | 10.677432 |
| H | 2.746140  | 6.894866  | 8.364408  | C | 0.540017  | 13.805782 | 10.010909 |
| H | 1.816635  | 7.435076  | 6.942603  | C | -1.924825 | 10.930952 | 10.682610 |
| H | 1.019501  | 6.572522  | 8.261486  | H | -1.624666 | 10.387312 | 9.780432  |
| C | -0.561111 | 11.614835 | 7.400452  | C | -3.455057 | 10.930487 | 10.728017 |
| H | -1.571663 | 11.685389 | 7.817759  | H | -3.836297 | 11.313929 | 11.680960 |
| H | -0.626265 | 11.127347 | 6.425990  | H | -3.831976 | 9.908197  | 10.619712 |
| H | -0.207027 | 12.642346 | 7.265531  | H | -3.881480 | 11.539320 | 9.923940  |



|   |          |           |           |   |           |           |           |
|---|----------|-----------|-----------|---|-----------|-----------|-----------|
| C | 5.099820 | 13.614842 | 14.496400 | H | 6.100870  | 12.815657 | 5.533671  |
| H | 4.165884 | 13.118269 | 14.784991 | C | 6.045183  | 12.971882 | 7.678366  |
| H | 4.966635 | 14.690291 | 14.617901 | C | 8.949531  | 14.150312 | 9.944233  |
| H | 5.864132 | 13.272277 | 15.198378 | H | 8.266441  | 14.276944 | 10.788479 |
| C | 5.931878 | 15.634666 | 10.092967 | C | 9.691106  | 15.479261 | 9.743768  |
| H | 6.941692 | 16.049169 | 10.168708 | H | 10.507846 | 15.380426 | 9.020457  |
| H | 5.246929 | 16.345032 | 10.559122 | H | 10.134146 | 15.810139 | 10.688930 |
| H | 5.696951 | 15.555648 | 9.028832  | H | 9.025073  | 16.269184 | 9.382095  |
| C | 3.510833 | 9.499936  | 17.188067 | C | 9.934763  | 13.046242 | 10.340630 |
| C | 2.944037 | 10.619738 | 17.846254 | H | 9.417897  | 12.115192 | 10.583386 |
| C | 1.964243 | 10.390357 | 18.815395 | H | 10.518719 | 13.351354 | 11.216293 |
| H | 1.507648 | 11.232691 | 19.323239 | H | 10.631508 | 12.826004 | 9.526218  |
| C | 1.538586 | 9.102915  | 19.124930 | C | 4.635903  | 12.409747 | 7.770249  |
| H | 0.768907 | 8.950130  | 19.876721 | H | 4.297665  | 12.514245 | 8.809990  |
| C | 2.085229 | 8.016143  | 18.454502 | C | 4.640731  | 10.913625 | 7.421863  |
| H | 1.728986 | 7.015827  | 18.682372 | H | 4.943385  | 10.757405 | 6.380519  |
| C | 3.072758 | 8.190746  | 17.480717 | H | 3.642729  | 10.492246 | 7.560703  |
| C | 3.355456 | 12.039425 | 17.478774 | H | 5.341307  | 10.356422 | 8.053137  |
| H | 3.388733 | 12.078671 | 16.383124 | C | 3.631671  | 13.160840 | 6.890774  |
| C | 2.350559 | 13.108222 | 17.912478 | H | 3.595143  | 14.223819 | 7.147538  |
| H | 1.335427 | 12.866834 | 17.590188 | H | 2.632305  | 12.732567 | 7.020768  |
| H | 2.622560 | 14.066138 | 17.458221 | H | 3.888653  | 13.081258 | 5.828919  |
| H | 2.355150 | 13.249847 | 19.000208 | N | 4.400452  | 6.240557  | 10.482536 |
| C | 4.753621 | 12.403600 | 17.999157 | C | 3.328249  | 5.455052  | 10.610207 |
| H | 4.798939 | 12.290938 | 19.088509 | C | 2.013121  | 5.923337  | 10.477112 |
| H | 4.981293 | 13.448615 | 17.760348 | H | 1.224360  | 5.211577  | 10.690000 |
| H | 5.536154 | 11.787224 | 17.553015 | C | 1.589993  | 7.204840  | 10.073581 |
| C | 3.589594 | 6.991148  | 16.704360 | N | 2.443457  | 8.170800  | 9.733030  |
| H | 4.551879 | 7.269419  | 16.263225 | C | 3.525957  | 3.984316  | 10.892757 |
| C | 3.824124 | 5.762312  | 17.589434 | H | 4.057564  | 3.513204  | 10.058282 |
| H | 4.456553 | 6.003521  | 18.449979 | H | 2.574776  | 3.468650  | 11.033455 |
| H | 4.312480 | 4.965219  | 17.019567 | H | 4.146771  | 3.831215  | 11.781482 |
| H | 2.884133 | 5.349763  | 17.970422 | C | 0.108179  | 7.479214  | 10.040729 |
| C | 2.640203 | 6.658418  | 15.545209 | H | -0.100571 | 8.407867  | 10.576329 |
| H | 1.640622 | 6.415503  | 15.921416 | H | -0.447332 | 6.664077  | 10.506530 |
| H | 3.006399 | 5.803087  | 14.966526 | H | -0.265754 | 7.615423  | 9.021399  |
| H | 2.533891 | 7.504520  | 14.861449 | N | 1.876729  | 9.402333  | 9.344649  |
| C | 6.782506 | 13.324286 | 8.830768  | C | 1.481560  | 9.512974  | 8.079812  |
| C | 8.126025 | 13.760706 | 8.723016  | C | 0.789662  | 10.642985 | 7.607950  |
| C | 8.703118 | 13.825676 | 7.452333  | H | 0.500492  | 10.618725 | 6.563923  |
| H | 9.738429 | 14.140680 | 7.355390  | C | 0.294591  | 11.718424 | 8.370783  |
| C | 7.979419 | 13.502324 | 6.308320  | N | 0.669905  | 11.972430 | 9.627480  |
| H | 8.446174 | 13.570109 | 5.329504  | C | 1.771583  | 8.397706  | 7.104254  |
| C | 6.659790 | 13.083148 | 6.426449  | H | 2.812214  | 8.071246  | 7.203230  |

|   |           |           |           |   |           |           |           |
|---|-----------|-----------|-----------|---|-----------|-----------|-----------|
| H | 1.592057  | 8.724452  | 6.078679  | C | -1.314500 | 11.027108 | 11.476063 |
| H | 1.154316  | 7.514990  | 7.297402  | H | -0.337184 | 10.526817 | 11.445122 |
| C | -0.758080 | 12.581137 | 7.705349  | C | -2.165300 | 10.433475 | 10.343447 |
| H | -1.667268 | 12.601319 | 8.314187  | H | -3.113615 | 10.975562 | 10.254483 |
| H | -1.010657 | 12.201129 | 6.714266  | H | -2.396558 | 9.383004  | 10.551958 |
| H | -0.428407 | 13.619723 | 7.606752  | H | -1.649517 | 10.473007 | 9.381613  |
| C | 5.704208  | 5.680538  | 10.577938 | C | -1.933527 | 10.692486 | 12.832912 |
| C | 6.370850  | 5.280416  | 9.401047  | H | -1.383015 | 11.157534 | 13.654228 |
| C | 7.724807  | 4.941458  | 9.483072  | H | -1.917130 | 9.608314  | 12.984402 |
| H | 8.260836  | 4.656875  | 8.581365  | H | -2.980225 | 11.013176 | 12.891884 |
| C | 8.399705  | 4.972946  | 10.699417 | C | 1.365287  | 14.762525 | 9.321524  |
| H | 9.454769  | 4.718012  | 10.744861 | H | 1.456200  | 14.036869 | 8.509687  |
| C | 7.713503  | 5.312805  | 11.863288 | C | 2.676542  | 14.699978 | 10.105535 |
| H | 8.240733  | 5.300975  | 12.812867 | H | 2.679269  | 15.412523 | 10.936665 |
| C | 6.361984  | 5.666553  | 11.827261 | H | 3.522976  | 14.922908 | 9.453523  |
| C | 5.646929  | 5.252759  | 8.064247  | H | 2.842111  | 13.710150 | 10.538539 |
| H | 4.577831  | 5.371973  | 8.268463  | C | 1.178182  | 16.139044 | 8.682065  |
| C | 6.069860  | 6.423159  | 7.164484  | H | 0.217639  | 16.212470 | 8.161515  |
| H | 7.150010  | 6.408164  | 6.980999  | H | 1.976007  | 16.325722 | 7.955266  |
| H | 5.826918  | 7.389950  | 7.618526  | H | 1.222647  | 16.944938 | 9.422890  |
| H | 5.559088  | 6.371998  | 6.196517  | C | 6.569884  | 8.604520  | 9.864362  |
| C | 5.835087  | 3.914774  | 7.339042  | H | 7.251536  | 7.792415  | 9.551207  |
| H | 6.873904  | 3.765304  | 7.025214  | N | 7.202476  | 9.702275  | 10.163328 |
| H | 5.212153  | 3.877550  | 6.438994  | C | 8.635276  | 9.701486  | 10.035790 |
| H | 5.557594  | 3.073499  | 7.982130  | C | 9.420964  | 9.372379  | 11.150889 |
| C | 5.597260  | 6.031976  | 13.089392 | C | 10.812204 | 9.442199  | 11.026660 |
| H | 4.539878  | 5.824149  | 12.896279 | H | 11.430436 | 9.203011  | 11.888582 |
| C | 6.017447  | 5.194101  | 14.299240 | C | 11.404590 | 9.785492  | 9.815446  |
| H | 5.964372  | 4.122534  | 14.082281 | H | 12.486577 | 9.839596  | 9.733880  |
| H | 5.362662  | 5.404890  | 15.147714 | C | 10.606780 | 10.036210 | 8.701790  |
| H | 7.039024  | 5.424927  | 14.619896 | H | 11.066017 | 10.275132 | 7.745836  |
| C | 5.697607  | 7.525576  | 13.419630 | C | 9.213485  | 9.995585  | 8.789511  |
| H | 6.679364  | 7.783828  | 13.821013 | C | 8.780466  | 8.850785  | 12.402499 |
| H | 4.958799  | 7.803793  | 14.177727 | H | 7.819152  | 9.325402  | 12.600933 |
| H | 5.536510  | 8.157597  | 12.539338 | H | 9.423338  | 8.981977  | 13.276201 |
| C | -0.076586 | 12.952730 | 10.351569 | H | 8.571189  | 7.781147  | 12.287453 |
| C | -1.054714 | 12.512034 | 11.272914 | C | 8.349212  | 10.227744 | 7.586391  |
| C | -1.746761 | 13.473029 | 12.015055 | H | 7.784556  | 9.325089  | 7.324526  |
| H | -2.479838 | 13.158434 | 12.749603 | H | 8.945169  | 10.523940 | 6.721077  |
| C | -1.488418 | 14.830481 | 11.857034 | H | 7.618630  | 11.016546 | 7.773211  |
| H | -2.033908 | 15.559085 | 12.450226 | N | 2.107153  | 11.534589 | 14.031585 |
| C | -0.508547 | 15.249399 | 10.963729 | C | 1.044973  | 12.055649 | 14.784873 |
| H | -0.293928 | 16.309310 | 10.865241 | C | 0.260294  | 11.202244 | 15.610244 |
| C | 0.218480  | 14.324192 | 10.210087 | C | -0.366566 | 13.915124 | 15.508627 |

|                    |                |           |           |   |          |           |           |
|--------------------|----------------|-----------|-----------|---|----------|-----------|-----------|
| C                  | -0.796081      | 11.725326 | 16.358892 | H | 7.988570 | 11.661489 | 12.698630 |
| C                  | -1.133693      | 13.074609 | 16.306189 | H | 8.908641 | 11.425916 | 14.199805 |
| H                  | -0.595197      | 14.978631 | 15.470166 | H | 7.875280 | 12.851940 | 13.977399 |
| H                  | -1.379240      | 11.045215 | 16.976305 | N | 5.487076 | 12.133705 | 12.805470 |
| H                  | -1.967107      | 13.463181 | 16.885004 | C | 5.206698 | 13.394219 | 13.130662 |
| C                  | 0.465517       | 9.714084  | 15.633138 | C | 5.205584 | 14.457011 | 12.200208 |
| H                  | 1.509861       | 9.433189  | 15.752409 | H | 4.862064 | 15.406950 | 12.591843 |
| H                  | -0.072635      | 9.262140  | 16.470025 | C | 5.700884 | 14.490386 | 10.886523 |
| H                  | 0.108722       | 9.258400  | 14.705985 | N | 6.100078 | 13.413619 | 10.202865 |
| C                  | 0.721579       | 13.444328 | 14.768140 | C | 4.884278 | 13.737241 | 14.563717 |
| C                  | 1.532341       | 14.465314 | 14.009505 | H | 4.030473 | 13.149718 | 14.917043 |
| H                  | 1.443140       | 15.446084 | 14.488940 | H | 4.634683 | 14.793672 | 14.667202 |
| H                  | 2.587801       | 14.199475 | 13.972274 | H | 5.725397 | 13.509508 | 15.225424 |
| H                  | 1.192134       | 14.573957 | 12.974668 | C | 5.828994 | 15.855191 | 10.249189 |
| C                  | 2.277918       | 9.390211  | 12.915865 | H | 6.862325 | 16.209250 | 10.323784 |
| O                  | 1.306033       | 8.804302  | 12.652347 | H | 5.184955 | 16.583340 | 10.745267 |
| C                  | 2.176394       | 11.929163 | 12.646868 | H | 5.581919 | 15.822265 | 9.184599  |
| H                  | 3.026451       | 12.603863 | 12.441018 | C | 4.020525 | 9.646756  | 17.508470 |
| H                  | 1.259259       | 12.452139 | 12.348274 | C | 3.777103 | 10.823466 | 18.254270 |
|                    |                |           |           | C | 2.980484 | 10.740743 | 19.399717 |
| INT-3.log          |                |           |           | H | 2.793448 | 11.638818 | 19.982539 |
|                    |                |           |           | C | 2.417275 | 9.534035  | 19.798776 |
| SCF (B3PW91) =     | -4011.81989504 |           |           | H | 1.796905 | 9.487746  | 20.689710 |
| E(SCF)+ZPE(0 K)=   | -4009.934615   |           |           | C | 2.636988 | 8.388557  | 19.040176 |
| H(298 K)=          | -4009.823501   |           |           | H | 2.174316 | 7.453751  | 19.342649 |
| G(298 K)=          | -4010.075291   |           |           | C | 3.432180 | 8.423026  | 17.891251 |
| Lowest Frequency = | 19.9031cm-1    |           |           | C | 4.362225 | 12.159905 | 17.830134 |
|                    |                |           |           | H | 4.791477 | 12.017803 | 16.834250 |
| Mg                 | 3.871359       | 10.276252 | 14.585913 | C | 3.295308 | 13.255522 | 17.725607 |
| Mg                 | 5.593384       | 11.522621 | 10.834859 | H | 2.483616 | 12.962461 | 17.054369 |
| Mg                 | 4.000680       | 8.036427  | 10.416904 | H | 3.741915 | 14.178704 | 17.340380 |
| Mg                 | 2.182487       | 10.685636 | 10.039888 | H | 2.855689 | 13.488676 | 18.701560 |
| H                  | 3.882824       | 11.294483 | 10.161577 | C | 5.503721 | 12.591856 | 18.759988 |
| N                  | 4.811561       | 9.752676  | 16.324248 | H | 5.145440 | 12.717136 | 19.788370 |
| C                  | 6.145538       | 9.692731  | 16.448903 | H | 5.925744 | 13.548421 | 18.431453 |
| C                  | 7.050568       | 10.208359 | 15.510288 | H | 6.311916 | 11.854658 | 18.771866 |
| H                  | 8.100073       | 10.059183 | 15.736106 | C | 3.594590 | 7.189776  | 17.024672 |
| C                  | 6.792514       | 11.040129 | 14.391383 | H | 4.520571 | 7.318054  | 16.454457 |
| N                  | 5.578547       | 11.217693 | 13.887164 | C | 3.721482 | 5.891257  | 17.825392 |
| C                  | 6.728221       | 9.061315  | 17.694174 | H | 4.509747 | 5.966966  | 18.581383 |
| H                  | 6.406109       | 9.598106  | 18.591319 | H | 3.964911 | 5.054606  | 17.162986 |
| H                  | 7.819091       | 9.046663  | 17.668760 | H | 2.788014 | 5.632915  | 18.336804 |
| H                  | 6.362294       | 8.034133  | 17.802163 | C | 2.431909 | 7.112120  | 16.022395 |
| C                  | 7.962780       | 11.777032 | 13.785596 | H | 1.484281 | 6.968868  | 16.553419 |

|   |           |           |           |   |           |           |           |
|---|-----------|-----------|-----------|---|-----------|-----------|-----------|
| H | 2.561105  | 6.279758  | 15.321751 | H | -0.156706 | 7.170456  | 7.912548  |
| H | 2.336380  | 8.036659  | 15.442193 | N | 1.922744  | 9.149844  | 8.725030  |
| C | 6.817654  | 13.595024 | 8.985594  | C | 1.534497  | 9.363614  | 7.475185  |
| C | 8.205591  | 13.863962 | 9.034624  | C | 0.811333  | 10.527469 | 7.119154  |
| C | 8.921340  | 13.903131 | 7.835383  | H | 0.547397  | 10.602543 | 6.069861  |
| H | 9.992564  | 14.085635 | 7.863144  | C | 0.249324  | 11.501968 | 7.964239  |
| C | 8.290026  | 13.717089 | 6.609347  | N | 0.571191  | 11.657166 | 9.258433  |
| H | 8.864361  | 13.753750 | 5.687577  | C | 1.839607  | 8.364340  | 6.386922  |
| C | 6.919506  | 13.489042 | 6.571418  | H | 2.661101  | 7.709125  | 6.684404  |
| H | 6.427744  | 13.343275 | 5.613112  | H | 2.108646  | 8.895717  | 5.469968  |
| C | 6.163195  | 13.415893 | 7.745846  | H | 0.972818  | 7.736952  | 6.154360  |
| C | 8.927672  | 14.109433 | 10.351195 | C | -0.792269 | 12.410230 | 7.349706  |
| H | 8.173741  | 14.162024 | 11.142513 | H | -1.674212 | 12.472180 | 7.994127  |
| C | 9.691924  | 15.440827 | 10.341791 | H | -1.099268 | 12.052735 | 6.365809  |
| H | 10.535538 | 15.413256 | 9.643279  | H | -0.410840 | 13.430159 | 7.243308  |
| H | 10.097301 | 15.653106 | 11.336922 | C | 5.481619  | 5.493457  | 10.629443 |
| H | 9.050771  | 16.278235 | 10.049064 | C | 6.313136  | 5.160370  | 9.534218  |
| C | 9.871223  | 12.954684 | 10.701780 | C | 7.655217  | 4.864179  | 9.782984  |
| H | 9.335746  | 12.005466 | 10.760616 | H | 8.314426  | 4.625760  | 8.953589  |
| H | 10.358080 | 13.134907 | 11.666798 | C | 8.172417  | 4.886497  | 11.076746 |
| H | 10.652878 | 12.837469 | 9.944176  | H | 9.221912  | 4.663629  | 11.247552 |
| C | 4.674094  | 13.122896 | 7.662585  | C | 7.339416  | 5.194759  | 12.145957 |
| H | 4.263761  | 13.216072 | 8.672362  | H | 7.742956  | 5.207623  | 13.155517 |
| C | 4.399321  | 11.686589 | 7.198030  | C | 5.989889  | 5.502206  | 11.943376 |
| H | 4.823583  | 11.501631 | 6.204311  | C | 5.776566  | 5.213066  | 8.111642  |
| H | 3.319897  | 11.499944 | 7.148313  | H | 4.695986  | 5.043126  | 8.153537  |
| H | 4.827620  | 10.954750 | 7.889593  | C | 5.983137  | 6.610786  | 7.508279  |
| C | 3.951928  | 14.129549 | 6.759509  | H | 7.044523  | 6.882492  | 7.512016  |
| H | 4.111869  | 15.157472 | 7.100733  | H | 5.436430  | 7.371656  | 8.074044  |
| H | 2.874991  | 13.934939 | 6.752808  | H | 5.621214  | 6.646077  | 6.474581  |
| H | 4.301179  | 14.065867 | 5.723375  | C | 6.374277  | 4.136881  | 7.200299  |
| N | 4.176792  | 5.994588  | 10.376895 | H | 7.432840  | 4.321190  | 6.986945  |
| C | 3.151618  | 5.168732  | 10.156345 | H | 5.849843  | 4.124906  | 6.239210  |
| C | 1.891419  | 5.615443  | 9.726880  | H | 6.289789  | 3.141804  | 7.648938  |
| H | 1.097396  | 4.877332  | 9.722141  | C | 5.106604  | 5.873105  | 13.120162 |
| C | 1.526696  | 6.903676  | 9.266037  | H | 4.085941  | 5.989303  | 12.735712 |
| N | 2.410410  | 7.890860  | 9.115394  | C | 5.082950  | 4.768842  | 14.182091 |
| C | 3.342517  | 3.690327  | 10.394962 | H | 4.782033  | 3.808647  | 13.751322 |
| H | 4.076502  | 3.283237  | 9.690513  | H | 4.379320  | 5.021738  | 14.979770 |
| H | 2.409629  | 3.136249  | 10.278626 | H | 6.067600  | 4.635357  | 14.643270 |
| H | 3.743014  | 3.513843  | 11.398864 | C | 5.526302  | 7.214826  | 13.730755 |
| C | 0.063976  | 7.147738  | 8.983629  | H | 6.521847  | 7.160484  | 14.182189 |
| H | -0.231230 | 8.121155  | 9.386278  | H | 4.825312  | 7.520585  | 14.510879 |
| H | -0.549744 | 6.367414  | 9.436396  | H | 5.553100  | 8.013571  | 12.982164 |



|   |           |           |           |                    |                |           |           |
|---|-----------|-----------|-----------|--------------------|----------------|-----------|-----------|
| C | -0.158680 | 12.581510 | 10.066063 | H                  | 8.205871       | 7.702447  | 12.422592 |
| C | -1.094900 | 12.072194 | 10.999082 | C                  | 7.765554       | 10.341522 | 7.781655  |
| C | -1.759416 | 12.973166 | 11.835274 | H                  | 7.117591       | 9.486211  | 7.558890  |
| H | -2.468027 | 12.604916 | 12.568765 | H                  | 8.321658       | 10.604205 | 6.879886  |
| C | -1.516435 | 14.341293 | 11.761848 | H                  | 7.113646       | 11.183230 | 8.017884  |
| H | -2.038099 | 15.020936 | 12.429158 | N                  | 1.978828       | 10.911607 | 14.483630 |
| C | -0.578449 | 14.825990 | 10.860151 | C                  | 1.107179       | 11.872630 | 15.017034 |
| H | -0.359853 | 15.889911 | 10.834983 | C                  | 0.330327       | 11.557767 | 16.157408 |
| C | 0.124276  | 13.962410 | 10.013533 | C                  | 0.178078       | 14.120182 | 15.046752 |
| C | -1.377986 | 10.579510 | 11.082162 | C                  | -0.484775      | 12.536081 | 16.731040 |
| H | -0.420602 | 10.055964 | 10.950995 | C                  | -0.561142      | 13.817254 | 16.186193 |
| C | -2.292796 | 10.120050 | 9.936790  | H                  | 0.116054       | 15.112595 | 14.604189 |
| H | -3.237477 | 10.674680 | 9.957572  | H                  | -1.070800      | 12.286170 | 17.613494 |
| H | -2.524309 | 9.053532  | 10.034957 | H                  | -1.196888      | 14.570743 | 16.644478 |
| H | -1.824563 | 10.271799 | 8.961372  | C                  | 0.401038       | 10.172125 | 16.731332 |
| C | -1.955865 | 10.142284 | 12.430656 | H                  | 1.404229       | 9.950166  | 17.101117 |
| H | -1.379545 | 10.541749 | 13.270769 | H                  | -0.303112      | 10.045529 | 17.559139 |
| H | -1.950688 | 9.049631  | 12.499799 | H                  | 0.181726       | 9.419769  | 15.965945 |
| H | -2.995532 | 10.468437 | 12.547564 | C                  | 1.007227       | 13.165476 | 14.449886 |
| C | 1.248900  | 14.507299 | 9.154372  | C                  | 1.771697       | 13.508231 | 13.205509 |
| H | 1.527222  | 13.732706 | 8.433918  | H                  | 2.130486       | 14.541441 | 13.214299 |
| C | 2.481113  | 14.770739 | 10.026801 | H                  | 2.633182       | 12.846480 | 13.081601 |
| H | 2.252436  | 15.483830 | 10.825394 | H                  | 1.135988       | 13.398781 | 12.321918 |
| H | 3.294719  | 15.184666 | 9.426249  | C                  | 2.765289       | 9.568122  | 12.757217 |
| H | 2.847809  | 13.855571 | 10.501712 | O                  | 2.764158       | 9.297365  | 11.508496 |
| C | 0.860511  | 15.765552 | 8.371192  | C                  | 1.549219       | 10.309109 | 13.246076 |
| H | -0.060281 | 15.619666 | 7.797273  | H                  | 1.193682       | 11.036485 | 12.470343 |
| H | 1.659845  | 16.037064 | 7.674264  | H                  | 0.712091       | 9.579759  | 13.337109 |
| H | 0.703591  | 16.622099 | 9.035508  |                    |                |           |           |
| C | 6.072421  | 8.667898  | 10.332595 | INT-4.log          |                |           |           |
| H | 6.744707  | 7.800841  | 10.170805 |                    |                |           |           |
| N | 6.732603  | 9.788687  | 10.371990 | SCF (B3PW91) =     | -4011.81844650 |           |           |
| C | 8.160170  | 9.718965  | 10.188165 | E(SCF)+ZPE(0 K)=   | -4009.932215   |           |           |
| C | 8.990624  | 9.299391  | 11.240896 | H(298 K)=          | -4009.821540   |           |           |
| C | 10.374700 | 9.304075  | 11.031611 | G(298 K)=          | -4010.071031   |           |           |
| H | 11.027949 | 9.000006  | 11.845923 | Lowest Frequency = | 21.2400cm-1    |           |           |
| C | 10.916039 | 9.668743  | 9.803772  |                    |                |           |           |
| H | 11.993110 | 9.670420  | 9.661523  | Mg                 | 12.741416      | 7.177414  | 8.638469  |
| C | 10.070876 | 10.011060 | 8.751465  | Mg                 | 12.451390      | 9.581580  | 6.011364  |
| H | 10.484127 | 10.265559 | 7.778878  | N                  | 13.946863      | 5.542087  | 8.026216  |
| C | 8.685799  | 10.036890 | 8.923496  | C                  | 15.229802      | 5.557653  | 7.645483  |
| C | 8.423222  | 8.771555  | 12.525511 | C                  | 15.986586      | 6.722132  | 7.416972  |
| H | 7.484710  | 9.252283  | 12.799325 | H                  | 17.017746      | 6.577802  | 7.116926  |
| H | 9.124115  | 8.895424  | 13.354820 | C                  | 15.522714      | 8.048935  | 7.429799  |

|   |           |           |           |   |           |           |           |
|---|-----------|-----------|-----------|---|-----------|-----------|-----------|
| N | 14.300396 | 8.335184  | 7.843317  | H | 14.537902 | 13.616094 | 2.689162  |
| C | 15.958939 | 4.248463  | 7.417612  | C | 12.403074 | 13.790516 | 2.582999  |
| H | 15.353661 | 3.551761  | 6.832344  | H | 12.419656 | 14.333315 | 1.642014  |
| H | 16.165344 | 3.757308  | 8.373837  | C | 11.192047 | 13.488322 | 3.193508  |
| H | 16.908641 | 4.409183  | 6.904454  | H | 10.263203 | 13.790339 | 2.717103  |
| C | 16.420682 | 9.151186  | 6.932720  | C | 11.144393 | 12.793379 | 4.406528  |
| H | 15.995665 | 9.602425  | 6.031466  | C | 14.902865 | 12.254268 | 5.034500  |
| H | 17.418217 | 8.778069  | 6.695070  | H | 14.676937 | 11.402223 | 5.687036  |
| H | 16.506184 | 9.952590  | 7.672875  | C | 15.449474 | 13.362633 | 5.945776  |
| N | 13.782692 | 9.621701  | 7.606757  | H | 15.664458 | 14.267152 | 5.365681  |
| C | 13.706396 | 10.448868 | 8.621098  | H | 16.376491 | 13.039498 | 6.432508  |
| C | 12.831079 | 11.591348 | 8.594458  | H | 14.732037 | 13.627057 | 6.727302  |
| H | 13.004113 | 12.282726 | 9.411721  | C | 15.966904 | 11.808645 | 4.027354  |
| C | 12.430753 | 12.254626 | 7.381237  | H | 15.573859 | 11.062634 | 3.329684  |
| N | 12.388068 | 11.645845 | 6.212051  | H | 16.821942 | 11.371030 | 4.553249  |
| C | 14.554898 | 10.254098 | 9.847758  | H | 16.349786 | 12.649132 | 3.438710  |
| H | 14.819482 | 9.205012  | 9.981495  | C | 9.806513  | 12.425775 | 5.018112  |
| H | 14.046417 | 10.605378 | 10.743680 | H | 9.995016  | 11.988783 | 6.005875  |
| H | 15.473381 | 10.841541 | 9.730090  | C | 9.143558  | 11.353398 | 4.145160  |
| C | 12.091341 | 13.721711 | 7.479782  | H | 8.199479  | 11.006930 | 4.577760  |
| H | 12.164205 | 14.215411 | 6.510285  | H | 9.822959  | 10.501221 | 4.041204  |
| H | 12.732524 | 14.241168 | 8.193414  | H | 8.930768  | 11.741063 | 3.142805  |
| H | 11.055017 | 13.804221 | 7.822242  | C | 8.903465  | 13.646940 | 5.218350  |
| C | 13.295477 | 4.273883  | 8.067712  | H | 8.666185  | 14.134741 | 4.267182  |
| C | 13.436971 | 3.433708  | 9.191593  | H | 9.378908  | 14.389265 | 5.867516  |
| C | 12.783469 | 2.198734  | 9.191199  | H | 7.951383  | 13.354951 | 5.674790  |
| H | 12.886615 | 1.539750  | 10.049347 | C | 12.438410 | 8.030659  | 10.677689 |
| C | 11.974561 | 1.817554  | 8.127968  | H | 12.735924 | 7.231229  | 11.394763 |
| H | 11.451492 | 0.865498  | 8.151364  | N | 11.778352 | 8.974242  | 11.302387 |
| C | 11.806451 | 2.674094  | 7.043992  | C | 11.494981 | 8.786494  | 12.700483 |
| H | 11.138588 | 2.378321  | 6.242465  | C | 10.598939 | 7.768544  | 13.090236 |
| C | 14.227178 | 3.880974  | 10.410056 | C | 10.404775 | 7.545537  | 14.456608 |
| H | 14.831648 | 4.744989  | 10.115354 | H | 9.720485  | 6.759907  | 14.767126 |
| C | 13.264155 | 4.353214  | 11.507269 | C | 11.053092 | 8.320507  | 15.415070 |
| H | 12.565264 | 5.096916  | 11.114653 | H | 10.884568 | 8.135064  | 16.472106 |
| H | 13.808390 | 4.794624  | 12.350108 | C | 11.893213 | 9.352874  | 15.010572 |
| H | 12.668810 | 3.515035  | 11.884521 | H | 12.384134 | 9.979460  | 15.750868 |
| C | 15.176004 | 2.805249  | 10.949503 | C | 12.126043 | 9.601681  | 13.654260 |
| H | 14.626259 | 1.953474  | 11.364762 | C | 9.838140  | 6.959147  | 12.075288 |
| H | 15.796708 | 3.214075  | 11.754084 | H | 9.310294  | 7.616190  | 11.377461 |
| H | 15.839326 | 2.420379  | 10.168343 | H | 9.101165  | 6.316393  | 12.562951 |
| C | 12.356449 | 12.405284 | 5.001705  | H | 10.484580 | 6.322726  | 11.463636 |
| C | 13.597655 | 12.680490 | 4.381930  | C | 13.077153 | 10.686579 | 13.240253 |
| C | 13.595304 | 13.384339 | 3.175751  | H | 12.675822 | 11.276252 | 12.411759 |

|    |           |           |           |   |           |           |           |
|----|-----------|-----------|-----------|---|-----------|-----------|-----------|
| H  | 14.038558 | 10.269285 | 12.919652 | H | 8.434522  | 5.084785  | 4.097577  |
| H  | 13.259365 | 11.384966 | 14.059644 | H | 7.214254  | 6.337648  | 3.815535  |
| Mg | 9.515247  | 6.962382  | 8.469765  | H | 6.724269  | 4.652021  | 3.937249  |
| Mg | 11.075851 | 10.491836 | 10.070937 | C | 5.754003  | 6.017172  | 6.098739  |
| N  | 7.799631  | 5.859777  | 8.638960  | H | 5.076780  | 5.179654  | 5.896448  |
| C  | 6.739028  | 6.247336  | 9.344102  | H | 5.474341  | 6.844876  | 5.436949  |
| C  | 6.600452  | 7.525005  | 9.908549  | H | 5.595286  | 6.348667  | 7.125568  |
| H  | 5.682640  | 7.679774  | 10.466336 | C | 8.496139  | 3.610723  | 10.362025 |
| C  | 7.431864  | 8.664005  | 9.846440  | H | 8.182036  | 4.616929  | 10.655250 |
| N  | 8.632531  | 8.695276  | 9.260167  | C | 7.708614  | 2.605498  | 11.211626 |
| C  | 5.598826  | 5.282317  | 9.590727  | H | 6.637924  | 2.630946  | 10.985223 |
| H  | 5.801288  | 4.691906  | 10.490628 | H | 8.056942  | 1.580478  | 11.043482 |
| H  | 5.480959  | 4.579519  | 8.763321  | H | 7.840068  | 2.823185  | 12.277232 |
| H  | 4.658154  | 5.814957  | 9.744760  | C | 9.995371  | 3.508706  | 10.650416 |
| C  | 6.847231  | 9.865891  | 10.558442 | H | 10.564601 | 4.220094  | 10.045250 |
| H  | 5.845466  | 10.083898 | 10.176631 | H | 10.198341 | 3.712546  | 11.707564 |
| H  | 7.450940  | 10.764297 | 10.477081 | H | 10.372794 | 2.509653  | 10.415271 |
| H  | 6.740092  | 9.619432  | 11.619128 | C | 10.618408 | 12.871603 | 12.013977 |
| N  | 9.292923  | 9.946833  | 9.227617  | C | 9.907722  | 12.389404 | 13.140396 |
| C  | 8.732175  | 10.908452 | 8.490849  | C | 10.292094 | 12.806689 | 14.415554 |
| C  | 8.997991  | 12.284832 | 8.699216  | H | 9.760382  | 12.426357 | 15.281663 |
| H  | 8.516523  | 12.951503 | 7.992503  | C | 11.342548 | 13.700506 | 14.597953 |
| C  | 9.533891  | 12.919010 | 9.846930  | H | 11.629436 | 14.012608 | 15.598422 |
| N  | 10.310909 | 12.301222 | 10.737461 | C | 12.012455 | 14.196806 | 13.488529 |
| C  | 7.699488  | 10.551018 | 7.450732  | H | 12.825400 | 14.905353 | 13.625331 |
| H  | 7.948283  | 9.597129  | 6.976505  | C | 11.672303 | 13.795137 | 12.192209 |
| H  | 7.639939  | 11.336134 | 6.696938  | C | 8.691354  | 11.505153 | 12.954945 |
| H  | 6.703332  | 10.442966 | 7.891260  | H | 8.875735  | 10.888511 | 12.068417 |
| C  | 9.185567  | 14.381774 | 10.018135 | C | 7.467710  | 12.394963 | 12.679550 |
| H  | 9.239748  | 14.681466 | 11.066746 | H | 7.330738  | 13.105843 | 13.502216 |
| H  | 8.187185  | 14.600812 | 9.634550  | H | 6.554900  | 11.796740 | 12.595997 |
| H  | 9.899559  | 15.001458 | 9.463523  | H | 7.581722  | 12.967585 | 11.755219 |
| C  | 7.850137  | 4.552993  | 8.076633  | C | 8.410862  | 10.567345 | 14.127195 |
| C  | 7.617306  | 4.401461  | 6.688615  | H | 9.303538  | 10.011573 | 14.416732 |
| C  | 7.760445  | 3.128520  | 6.129317  | H | 7.637266  | 9.844126  | 13.848772 |
| H  | 7.593267  | 2.985379  | 5.066857  | H | 8.039780  | 11.109913 | 15.004453 |
| C  | 8.134152  | 2.035905  | 6.907822  | C | 12.460726 | 14.354767 | 11.027327 |
| H  | 8.253138  | 1.057803  | 6.449359  | H | 12.036207 | 13.914078 | 10.123474 |
| C  | 8.363177  | 2.202052  | 8.268069  | C | 13.943279 | 13.962690 | 11.104479 |
| H  | 8.670863  | 1.350439  | 8.868694  | H | 14.473168 | 14.258461 | 10.191663 |
| C  | 8.220810  | 3.452060  | 8.876682  | H | 14.072367 | 12.885297 | 11.239462 |
| C  | 7.212105  | 5.602376  | 5.843854  | H | 14.435619 | 14.456732 | 11.948696 |
| H  | 7.849301  | 6.441892  | 6.157975  | C | 12.326231 | 15.879043 | 10.914316 |
| C  | 7.416243  | 5.399665  | 4.341524  | H | 12.799864 | 16.380318 | 11.765256 |

H 11.279315 16.191694 10.888193  
H 12.815996 16.241635 10.003470  
O 11.481782 8.200839 7.177102  
C 10.407853 7.727814 6.649139  
H 9.312593 8.599204 5.135925  
C 10.261219 8.018796 5.183873  
H 9.981947 7.050814 4.746444  
N 11.407359 8.637717 4.567955  
C 11.855322 8.141771 3.353766  
C 13.263229 8.012532 3.162492  
C 13.784780 7.488509 1.981689  
H 14.864049 7.387621 1.883323  
C 12.949174 7.063755 0.952071  
H 13.359810 6.641864 0.039429  
C 11.575418 7.214379 1.112514  
H 10.908476 6.926809 0.301234  
C 11.011328 7.761050 2.268960  
C 14.197045 8.384245 4.276750  
H 15.236296 8.152036 4.031347  
H 13.970612 7.827279 5.199211  
H 14.199029 9.469981 4.481376  
C 9.521995 8.001145 2.286419  
H 9.279226 8.944221 2.781038  
H 8.964093 7.212893 2.801554  
H 9.134409 8.052089 1.264517  
C 12.465749 3.905147 6.983147  
C 12.321762 4.818667 5.772655  
H 12.301231 5.852739 6.141794  
C 11.030276 4.584500 4.991019  
H 10.149770 4.672694 5.634578  
H 10.958600 5.314556 4.178415  
H 11.008333 3.592741 4.526046  
C 13.522425 4.719172 4.818907  
H 14.447527 5.051621 5.293734  
H 13.658774 3.685605 4.480157  
H 13.356266 5.351894 3.940362  
H 11.096500 6.259942 9.081962

INT-5.log

SCF (B3PW91) = -4011.88427664  
E(SCF)+ZPE(0 K)= -4009.997200  
H(298 K)= -4009.886329  
G(298 K)= -4010.136330

Lowest Frequency = 21.0420cm-1

Mg 12.467939 6.915964 8.550323  
Mg 11.682831 9.286370 6.129027  
N 13.920395 5.391164 8.408985  
C 15.188152 5.545705 7.997458  
C 15.728517 6.723315 7.450113  
H 16.751936 6.660406 7.100135  
C 15.086658 7.958833 7.238777  
N 13.862810 8.164605 7.687127  
C 16.155724 4.385058 8.125928  
H 15.783500 3.484362 7.633114  
H 16.281686 4.121305 9.180654  
H 17.133617 4.634644 7.711274  
C 15.786545 9.015307 6.426376  
H 15.319186 9.051204 5.435459  
H 16.845273 8.785010 6.296885  
H 15.686926 10.012557 6.860920  
N 13.230223 9.402195 7.489249  
C 13.367529 10.306897 8.425768  
C 12.527834 11.480624 8.465086  
H 12.876047 12.229712 9.169800  
C 11.914913 12.063028 7.302786  
N 11.619563 11.369565 6.217416  
C 14.404913 10.152262 9.501588  
H 14.476537 9.109857 9.817053  
H 14.173186 10.776762 10.362118  
H 15.383172 10.456707 9.112973  
C 11.641008 13.547571 7.348957  
H 11.634567 13.983836 6.349323  
H 12.369019 14.077859 7.964291  
H 10.646311 13.693610 7.784789  
C 13.541077 4.063448 8.780253  
C 13.588119 3.659942 10.131388  
C 13.299841 2.329449 10.450527  
H 13.347472 2.009668 11.488693  
C 12.961354 1.409727 9.465127  
H 12.756204 0.375224 9.727334  
C 12.855044 1.833450 8.144751  
H 12.552582 1.123732 7.378959  
C 13.904705 4.642813 11.244100  
H 14.048372 5.623611 10.776617  
C 12.717558 4.738230 12.212230  
H 11.789688 4.907447 11.659124

|   |           |           |           |    |           |           |           |
|---|-----------|-----------|-----------|----|-----------|-----------|-----------|
| H | 12.848735 | 5.557369  | 12.927906 | C  | 12.396723 | 9.321266  | 14.894083 |
| H | 12.598208 | 3.810817  | 12.783702 | H  | 13.028061 | 9.903483  | 15.560520 |
| C | 15.193877 | 4.298102  | 11.998625 | C  | 12.436459 | 9.588034  | 13.522029 |
| H | 15.122225 | 3.313640  | 12.474579 | C  | 9.780780  | 7.122981  | 12.274073 |
| H | 15.386219 | 5.035910  | 12.785624 | H  | 9.346173  | 7.802124  | 11.537875 |
| H | 16.060716 | 4.283326  | 11.331428 | H  | 8.970131  | 6.671186  | 12.851203 |
| C | 11.443720 | 12.058683 | 4.974003  | H  | 10.266259 | 6.329974  | 11.696609 |
| C | 12.589816 | 12.211243 | 4.157199  | C  | 13.368586 | 10.635731 | 12.984625 |
| C | 12.436114 | 12.830694 | 2.915095  | H  | 12.874105 | 11.279478 | 12.251086 |
| H | 13.300844 | 12.956598 | 2.271645  | H  | 14.236399 | 10.179188 | 12.496659 |
| C | 11.192504 | 13.278421 | 2.480876  | H  | 13.724381 | 11.290841 | 13.782708 |
| H | 11.093674 | 13.752813 | 1.508456  | Mg | 9.588318  | 7.200037  | 8.581058  |
| C | 10.075432 | 13.101686 | 3.287348  | Mg | 11.001553 | 10.602665 | 10.137567 |
| H | 9.103003  | 13.428542 | 2.930859  | N  | 7.834867  | 6.197359  | 8.246738  |
| C | 10.177459 | 12.487572 | 4.540087  | C  | 6.761788  | 6.405683  | 8.999661  |
| C | 13.958701 | 11.743853 | 4.627134  | C  | 6.657868  | 7.464361  | 9.930271  |
| H | 13.800724 | 10.932020 | 5.345258  | H  | 5.780439  | 7.434933  | 10.565972 |
| C | 14.685119 | 12.865401 | 5.384534  | C  | 7.472348  | 8.596313  | 10.087440 |
| H | 14.850890 | 13.728277 | 4.729404  | N  | 8.601152  | 8.796306  | 9.387333  |
| H | 15.660851 | 12.516517 | 5.741140  | C  | 5.567357  | 5.485154  | 8.895134  |
| H | 14.112731 | 13.206400 | 6.251435  | H  | 5.416021  | 5.152995  | 7.865286  |
| C | 14.835572 | 11.195048 | 3.500095  | H  | 4.659366  | 5.975013  | 9.251402  |
| H | 14.327166 | 10.401308 | 2.947581  | H  | 5.729983  | 4.588426  | 9.501265  |
| H | 15.760407 | 10.784339 | 3.917758  | C  | 7.050039  | 9.574815  | 11.159708 |
| H | 15.129740 | 11.976763 | 2.791040  | H  | 6.036943  | 9.363912  | 11.504602 |
| C | 8.929563  | 12.206719 | 5.353517  | H  | 7.105435  | 10.621226 | 10.859054 |
| H | 9.239227  | 11.967544 | 6.376859  | H  | 7.730381  | 9.458489  | 12.010089 |
| C | 8.229315  | 10.971710 | 4.765265  | N  | 9.155239  | 10.093799 | 9.432263  |
| H | 7.271668  | 10.774913 | 5.253897  | C  | 8.422834  | 11.062547 | 8.881062  |
| H | 8.857110  | 10.081555 | 4.877522  | C  | 8.667302  | 12.438241 | 9.107454  |
| H | 8.042525  | 11.106094 | 3.694614  | H  | 8.046257  | 13.111810 | 8.526752  |
| C | 7.991992  | 13.414989 | 5.428837  | C  | 9.415194  | 13.050156 | 10.137159 |
| H | 7.574408  | 13.673362 | 4.450375  | N  | 10.325203 | 12.412844 | 10.877424 |
| H | 8.516586  | 14.294518 | 5.815417  | C  | 7.228221  | 10.703279 | 8.032290  |
| H | 7.144694  | 13.207524 | 6.090303  | H  | 7.439067  | 9.817119  | 7.427576  |
| C | 12.183647 | 8.005013  | 10.526843 | H  | 6.956138  | 11.540427 | 7.390669  |
| H | 12.467888 | 7.166300  | 11.201821 | H  | 6.352526  | 10.463336 | 8.643875  |
| N | 11.727856 | 9.006230  | 11.241297 | C  | 9.141662  | 14.520222 | 10.367080 |
| C | 11.629105 | 8.822298  | 12.664031 | H  | 9.342916  | 14.806690 | 11.401367 |
| C | 10.736435 | 7.857045  | 13.173996 | H  | 8.110788  | 14.779807 | 10.118918 |
| C | 10.735533 | 7.614574  | 14.550763 | H  | 9.801419  | 15.116750 | 9.726314  |
| H | 10.056198 | 6.866366  | 14.951431 | C  | 7.847285  | 5.134758  | 7.297914  |
| C | 11.569905 | 8.326494  | 15.408116 | C  | 7.718084  | 5.463882  | 5.927824  |
| H | 11.554034 | 8.127183  | 16.475846 | C  | 7.766378  | 4.427897  | 4.992589  |

|   |           |           |           |   |           |           |           |
|---|-----------|-----------|-----------|---|-----------|-----------|-----------|
| H | 7.668170  | 4.652156  | 3.935775  | H | 8.599856  | 11.274238 | 15.391628 |
| C | 7.955278  | 3.106292  | 5.389589  | C | 12.548729 | 14.395900 | 10.859343 |
| H | 7.994815  | 2.315858  | 4.645123  | H | 11.996125 | 13.958976 | 10.023884 |
| C | 8.123626  | 2.806139  | 6.735052  | C | 14.017760 | 13.966369 | 10.742541 |
| H | 8.312156  | 1.778976  | 7.035369  | H | 14.428019 | 14.237401 | 9.763083  |
| C | 8.084303  | 3.807083  | 7.711972  | H | 14.135598 | 12.887635 | 10.876091 |
| C | 7.536329  | 6.913844  | 5.499989  | H | 14.631599 | 14.454957 | 11.506579 |
| H | 8.209352  | 7.517150  | 6.126005  | C | 12.439482 | 15.922729 | 10.751817 |
| C | 7.927097  | 7.172985  | 4.045032  | H | 13.036403 | 16.414810 | 11.527291 |
| H | 8.947185  | 6.834901  | 3.844459  | H | 11.407282 | 16.263509 | 10.865088 |
| H | 7.877258  | 8.245100  | 3.835261  | H | 12.811247 | 16.267381 | 9.780347  |
| H | 7.244024  | 6.678697  | 3.344968  | O | 10.890819 | 7.701691  | 7.148473  |
| C | 6.106172  | 7.411370  | 5.757353  | C | 10.964494 | 6.617645  | 6.243177  |
| H | 5.383549  | 6.805957  | 5.198682  | H | 10.574687 | 5.664610  | 6.584849  |
| H | 6.001422  | 8.451672  | 5.428517  | C | 11.428174 | 6.819813  | 4.987992  |
| H | 5.844239  | 7.369295  | 6.816501  | H | 11.487719 | 5.963077  | 4.316586  |
| C | 8.351834  | 3.446812  | 9.164738  | N | 11.788050 | 8.066129  | 4.529314  |
| H | 8.159026  | 4.335702  | 9.774568  | C | 12.515239 | 8.150993  | 3.328704  |
| C | 7.439070  | 2.318163  | 9.663764  | C | 13.758108 | 7.491800  | 3.159971  |
| H | 6.381826  | 2.526625  | 9.471678  | C | 14.470864 | 7.667852  | 1.969080  |
| H | 7.679592  | 1.367648  | 9.175071  | H | 15.432144 | 7.169799  | 1.856393  |
| H | 7.570382  | 2.172044  | 10.741262 | C | 13.984030 | 8.473398  | 0.944168  |
| C | 9.824807  | 3.067422  | 9.362390  | H | 14.555947 | 8.606226  | 0.029689  |
| H | 10.490855 | 3.883127  | 9.069426  | C | 12.753227 | 9.106940  | 1.105482  |
| H | 10.029518 | 2.831428  | 10.412447 | H | 12.353066 | 9.727830  | 0.306655  |
| H | 10.089202 | 2.187513  | 8.768109  | C | 12.009296 | 8.951965  | 2.276786  |
| C | 10.821692 | 12.968817 | 12.097416 | C | 14.329562 | 6.620256  | 4.245148  |
| C | 10.254860 | 12.499272 | 13.307973 | H | 14.027367 | 5.574598  | 4.123608  |
| C | 10.807778 | 12.917379 | 14.519164 | H | 13.982282 | 6.924519  | 5.233317  |
| H | 10.388901 | 12.551631 | 15.450948 | H | 15.423365 | 6.643570  | 4.242358  |
| C | 11.891050 | 13.790858 | 14.555175 | C | 10.667014 | 9.605141  | 2.421666  |
| H | 12.310131 | 14.103344 | 15.507757 | H | 10.682867 | 10.377086 | 3.193715  |
| C | 12.427209 | 14.263154 | 13.365092 | H | 9.910658  | 8.875066  | 2.723915  |
| H | 13.267960 | 14.951785 | 13.391226 | H | 10.352588 | 10.081550 | 1.488802  |
| C | 11.911571 | 13.864757 | 12.126818 | C | 13.115325 | 3.157511  | 7.781553  |
| C | 9.040054  | 11.592408 | 13.275869 | C | 12.920078 | 3.591144  | 6.337634  |
| H | 9.157914  | 10.945833 | 12.398892 | H | 12.969347 | 4.684739  | 6.313613  |
| C | 7.759705  | 12.417735 | 13.074037 | C | 11.534366 | 3.181967  | 5.825009  |
| H | 7.650963  | 13.150067 | 13.882038 | H | 10.742808 | 3.489859  | 6.511598  |
| H | 6.877814  | 11.768304 | 13.085308 | H | 11.332828 | 3.638709  | 4.850466  |
| H | 7.765849  | 12.957080 | 12.124264 | H | 11.448043 | 2.096891  | 5.697437  |
| C | 8.896730  | 10.699404 | 14.506582 | C | 14.014127 | 3.044375  | 5.411123  |
| H | 9.825041  | 10.172444 | 14.730776 | H | 14.991983 | 3.476530  | 5.639698  |
| H | 8.115494  | 9.951231  | 14.335993 | H | 14.092543 | 1.954361  | 5.498192  |

H 13.784773 3.277555 4.365273  
H 10.878203 6.046046 9.217296

INT-6.log

SCF (B3PW91) = -4011.90592832

E(SCF)+ZPE(0 K)= -4010.014868

H(298 K)= -4009.904347

G(298 K)= -4010.154473

Lowest Frequency = 22.0084cm-1

Mg 12.302864 7.107003 8.224213  
Mg 11.498041 9.461317 5.771915  
N 13.917416 5.840329 8.521320  
C 15.178826 6.141000 8.194842  
C 15.608709 7.388067 7.702354  
H 16.658172 7.447791 7.438666  
C 14.846179 8.529509 7.388193  
N 13.551581 8.616696 7.666859  
C 16.250866 5.073223 8.277222  
H 16.210337 4.446173 7.381091  
H 16.109030 4.409879 9.132070  
H 17.246137 5.518417 8.332162  
C 15.516156 9.645771 6.627679  
H 15.088753 9.683899 5.618588  
H 16.590982 9.479078 6.543503  
H 15.340860 10.626474 7.076935  
N 12.864980 9.776587 7.251975  
C 12.808431 10.780140 8.111030  
C 12.086821 11.970461 7.853553  
H 12.085604 12.705130 8.649166  
C 11.463903 12.342199 6.652175  
N 11.281638 11.499067 5.627130  
C 13.528127 10.652972 9.424482  
H 13.360370 9.659536 9.855984  
H 13.214154 11.433755 10.116976  
H 14.611888 10.742524 9.300926  
C 10.990790 13.771015 6.521024  
H 11.423988 14.246013 5.635467  
H 11.245435 14.359282 7.403566  
H 9.903649 13.797257 6.390747  
C 13.648511 4.515556 8.984251  
C 13.652091 4.258876 10.376041  
C 13.446606 2.945264 10.808077

H 13.460934 2.724462 11.870348  
C 13.217565 1.911227 9.905734  
H 13.070527 0.896105 10.264947  
C 13.146166 2.191491 8.547502  
H 12.927698 1.390814 7.845269  
C 13.873229 5.374844 11.387923  
H 13.487303 6.300237 10.941911  
C 13.109369 5.137231 12.692435  
H 12.048109 4.947533 12.507190  
H 13.172007 6.020428 13.330165  
H 13.520116 4.292907 13.257559  
C 15.360269 5.616296 11.683664  
H 15.838988 4.699618 12.047285  
H 15.467367 6.385417 12.456727  
H 15.900535 5.958655 10.798317  
C 11.057459 12.013981 4.317611  
C 12.188205 12.194380 3.484466  
C 11.978447 12.600870 2.164545  
H 12.831200 12.743404 1.507581  
C 10.693482 12.807444 1.669892  
H 10.551533 13.115579 0.637567  
C 9.591252 12.603389 2.493647  
H 8.591182 12.745233 2.093450  
C 9.751904 12.204335 3.823714  
C 13.590375 11.946636 4.019844  
H 13.491774 11.247886 4.858693  
C 14.199602 13.234610 4.592253  
H 14.275060 14.005021 3.816103  
H 15.206461 13.041218 4.979195  
H 13.598386 13.634044 5.412929  
C 14.533670 11.310781 2.996272  
H 14.103228 10.406907 2.559160  
H 15.476631 11.038213 3.482350  
H 14.782168 12.001390 2.182388  
C 8.554830 11.900581 4.702901  
H 8.913591 11.903108 5.735610  
C 8.023939 10.489765 4.419441  
H 7.176358 10.248404 5.070093  
H 8.793654 9.729357 4.584222  
H 7.692821 10.398872 3.379075  
C 7.438433 12.940499 4.586896  
H 6.980897 12.938287 3.591911  
H 7.814531 13.950568 4.779702  
H 6.641729 12.725520 5.306706

|    |           |           |           |   |           |           |           |
|----|-----------|-----------|-----------|---|-----------|-----------|-----------|
| C  | 10.940905 | 7.212894  | 10.021788 | H | 7.584865  | 12.677348 | 7.529636  |
| H  | 11.604098 | 6.364901  | 10.286954 | H | 6.602119  | 11.684835 | 8.607048  |
| N  | 11.196583 | 8.318944  | 10.970331 | C | 10.197763 | 14.531798 | 11.081826 |
| C  | 11.168491 | 7.990786  | 12.340392 | H | 10.379178 | 14.596073 | 12.156724 |
| C  | 10.099330 | 7.281092  | 12.958119 | H | 9.293999  | 15.094142 | 10.840241 |
| C  | 10.172110 | 6.949035  | 14.314290 | H | 11.039949 | 15.015760 | 10.574675 |
| H  | 9.345571  | 6.397485  | 14.759516 | C | 7.914812  | 5.397233  | 7.382882  |
| C  | 11.228994 | 7.369060  | 15.115329 | C | 7.779734  | 5.470999  | 5.976897  |
| H  | 11.259331 | 7.116163  | 16.171384 | C | 7.896303  | 4.292136  | 5.235008  |
| C  | 12.228602 | 8.150965  | 14.542263 | H | 7.788771  | 4.324645  | 4.155940  |
| H  | 13.053650 | 8.509959  | 15.153858 | C | 8.165568  | 3.073073  | 5.850598  |
| C  | 12.221983 | 8.453299  | 13.179302 | H | 8.255437  | 2.169711  | 5.253677  |
| C  | 8.817991  | 6.991323  | 12.224717 | C | 8.356642  | 3.024738  | 7.225567  |
| H  | 8.629801  | 7.752571  | 11.460987 | H | 8.619031  | 2.082611  | 7.699167  |
| H  | 7.971500  | 6.992826  | 12.919174 | C | 8.245867  | 4.176648  | 8.009988  |
| H  | 8.819951  | 6.019171  | 11.718436 | C | 7.534816  | 6.808097  | 5.295265  |
| C  | 13.365894 | 9.232236  | 12.595860 | H | 8.106013  | 7.559561  | 5.856918  |
| H  | 13.067584 | 10.244555 | 12.294052 | C | 8.039456  | 6.842832  | 3.852174  |
| H  | 13.763354 | 8.728991  | 11.708752 | H | 9.089896  | 6.541914  | 3.795770  |
| H  | 14.170230 | 9.358211  | 13.326276 | H | 7.951455  | 7.856450  | 3.452738  |
| Mg | 9.448319  | 7.777267  | 8.398430  | H | 7.452987  | 6.190961  | 3.195151  |
| Mg | 10.806630 | 10.208831 | 10.575353 | C | 6.055384  | 7.213933  | 5.353859  |
| N  | 7.799953  | 6.598267  | 8.146363  | H | 5.427983  | 6.447833  | 4.884130  |
| C  | 6.653788  | 6.848473  | 8.787139  | H | 5.895816  | 8.156112  | 4.818139  |
| C  | 6.406075  | 8.001213  | 9.555004  | H | 5.715772  | 7.353684  | 6.382549  |
| H  | 5.460216  | 8.007295  | 10.085363 | C | 8.580842  | 4.115533  | 9.487619  |
| C  | 7.213186  | 9.136703  | 9.785905  | H | 8.292231  | 5.075370  | 9.927101  |
| N  | 8.383855  | 9.324713  | 9.177105  | C | 7.835983  | 3.011066  | 10.244060 |
| C  | 5.542316  | 5.823698  | 8.738461  | H | 6.752257  | 3.082575  | 10.108265 |
| H  | 5.398480  | 5.444163  | 7.723320  | H | 8.147123  | 2.015003  | 9.911122  |
| H  | 4.600332  | 6.238517  | 9.100571  | H | 8.050715  | 3.078449  | 11.315908 |
| H  | 5.801252  | 4.961557  | 9.361472  | C | 10.096897 | 3.958647  | 9.657198  |
| C  | 6.707443  | 10.088880 | 10.846345 | H | 10.638807 | 4.710708  | 9.076676  |
| H  | 5.632731  | 10.255311 | 10.738733 | H | 10.399030 | 4.065881  | 10.703438 |
| H  | 7.217751  | 11.050082 | 10.856015 | H | 10.440495 | 2.981821  | 9.303412  |
| H  | 6.871065  | 9.620620  | 11.823775 | C | 11.275925 | 12.357079 | 12.592579 |
| N  | 9.134774  | 10.477957 | 9.486554  | C | 10.488654 | 11.860286 | 13.664089 |
| C  | 8.715375  | 11.657645 | 9.042250  | C | 10.988980 | 11.945972 | 14.964303 |
| C  | 9.264078  | 12.872458 | 9.508424  | H | 10.399387 | 11.560980 | 15.789700 |
| H  | 8.872563  | 13.764952 | 9.033116  | C | 12.235101 | 12.507587 | 15.222135 |
| C  | 10.093977 | 13.095702 | 10.621150 | H | 12.611219 | 12.559490 | 16.240125 |
| N  | 10.776716 | 12.137468 | 11.265816 | C | 12.991029 | 13.004947 | 14.170331 |
| C  | 7.560246  | 11.734800 | 8.078533  | H | 13.960195 | 13.452139 | 14.374801 |
| H  | 7.582206  | 10.895545 | 7.379258  | C | 12.536049 | 12.942262 | 12.847778 |



C 9.094260 11.301712 13.422787  
 H 9.076015 10.838433 12.429159  
 C 8.065051 12.441571 13.384840  
 H 8.064509 12.984659 14.336580  
 H 7.057479 12.044856 13.218347  
 H 8.283333 13.154763 12.585590  
 C 8.678388 10.228389 14.428830  
 H 9.447319 9.460062 14.534738  
 H 7.757567 9.740531 14.091860  
 H 8.469794 10.654830 15.416538  
 C 13.420675 13.519769 11.755989  
 H 12.921820 13.342339 10.796052  
 C 14.801402 12.844537 11.722906  
 H 15.361222 13.158603 10.835407  
 H 14.728163 11.754678 11.715066  
 H 15.391920 13.124049 12.601747  
 C 13.604589 15.036920 11.919642  
 H 14.165374 15.262167 12.833197  
 H 12.649489 15.562679 11.984445  
 H 14.168102 15.448180 11.074986  
 O 10.590844 7.986488 6.826213  
 C 10.987813 6.747985 6.262064  
 H 10.379844 5.878996 6.506212  
 C 11.642763 6.797048 5.048061  
 H 11.897237 5.855793 4.559726  
 N 11.958113 7.966003 4.459482  
 C 12.721879 7.955557 3.272368  
 C 14.029975 7.423881 3.239575  
 C 14.761282 7.498970 2.048906  
 H 15.773868 7.101075 2.030504  
 C 14.223578 8.078934 0.904863  
 H 14.808753 8.134069 -0.009018  
 C 12.928500 8.592753 0.942740  
 H 12.496391 9.043626 0.052332  
 C 12.166221 8.539814 2.111091  
 C 14.649675 6.796267 4.458732  
 H 14.517397 5.707881 4.466104  
 H 14.202632 7.171534 5.379754  
 H 15.725259 6.990876 4.501326  
 C 10.767067 9.083866 2.137751  
 H 10.690406 9.964010 2.782682  
 H 10.064464 8.342967 2.527708  
 H 10.441970 9.388700 1.139629  
 C 13.341582 3.489346 8.064371

C 13.164090 3.760441 6.579784  
 H 13.274984 4.839168 6.426924  
 C 11.749260 3.364777 6.136390  
 H 10.985484 3.828086 6.763770  
 H 11.562662 3.659827 5.098359  
 H 11.599214 2.281274 6.196723  
 C 14.206980 3.043713 5.713854  
 H 15.226561 3.346034 5.967117  
 H 14.142204 1.956681 5.836372  
 H 14.043252 3.267262 4.653561  
 H 9.979202 6.699421 10.229883

INT-7.log

SCF (B3PW91) = -4125.16223722

E(SCF)+ZPE(0 K)= -4123.262385

H(298 K)= -4123.149755

G(298 K)= -4123.402328

Lowest Frequency = 17.8707cm<sup>-1</sup>

Mg 12.711395 6.907616 8.128339  
 Mg 11.439599 9.349739 6.090350  
 N 14.351234 5.625482 8.177024  
 C 15.534215 5.823921 7.595497  
 C 15.908871 7.012710 6.939065  
 H 16.879634 6.999437 6.455962  
 C 15.153164 8.185101 6.756240  
 N 13.937085 8.304713 7.266415  
 C 16.553821 4.705931 7.543195  
 H 16.404087 3.970341 8.335010  
 H 17.572139 5.097443 7.603811  
 H 16.457227 4.184690 6.584059  
 C 15.720816 9.270637 5.886989  
 H 15.240952 9.194943 4.904517  
 H 16.798141 9.159732 5.753809  
 H 15.509245 10.266973 6.277945  
 N 13.197519 9.496817 7.175169  
 C 13.363703 10.403857 8.104547  
 C 12.409751 11.481689 8.279904  
 H 12.717946 12.202564 9.031699  
 C 11.712247 12.091648 7.184930  
 N 11.399613 11.438321 6.072239  
 C 14.567296 10.388319 9.006716  
 H 14.956456 9.378093 9.143708

|   |           |           |           |    |           |           |           |
|---|-----------|-----------|-----------|----|-----------|-----------|-----------|
| H | 14.341164 | 10.825838 | 9.975869  | H  | 9.003668  | 12.181398 | 6.265505  |
| H | 15.354735 | 10.998956 | 8.548485  | C  | 8.024485  | 11.115226 | 4.688438  |
| C | 11.425503 | 13.571166 | 7.282829  | H  | 7.075328  | 10.928531 | 5.197806  |
| H | 12.042860 | 14.117713 | 6.562506  | H  | 8.659067  | 10.234244 | 4.827151  |
| H | 11.635963 | 13.949589 | 8.282764  | H  | 7.824643  | 11.210471 | 3.615719  |
| H | 10.380855 | 13.780257 | 7.044770  | C  | 7.770981  | 13.585365 | 5.216253  |
| C | 14.095776 | 4.415268  | 8.887950  | H  | 7.370458  | 13.782828 | 4.217182  |
| C | 14.304110 | 4.392489  | 10.286886 | H  | 8.284864  | 14.489639 | 5.557543  |
| C | 13.987232 | 3.227794  | 10.988854 | H  | 6.908341  | 13.419197 | 5.866981  |
| H | 14.142488 | 3.193839  | 12.063203 | C  | 12.270304 | 7.963220  | 10.040884 |
| C | 13.457882 | 2.115442  | 10.340134 | H  | 12.900022 | 8.772219  | 9.648802  |
| H | 13.209694 | 1.221220  | 10.905379 | N  | 10.970077 | 8.474704  | 10.528627 |
| C | 13.235458 | 2.159180  | 8.968715  | C  | 10.920272 | 8.359660  | 11.964054 |
| H | 12.807527 | 1.295403  | 8.466046  | C  | 9.941562  | 7.574979  | 12.629400 |
| C | 14.874476 | 5.604850  | 11.003938 | C  | 10.072149 | 7.313022  | 13.997599 |
| H | 14.651160 | 6.473874  | 10.374375 | H  | 9.331201  | 6.674693  | 14.473241 |
| C | 14.250387 | 5.846461  | 12.383055 | C  | 11.095841 | 7.863362  | 14.758342 |
| H | 13.158295 | 5.834754  | 12.343025 | H  | 11.175310 | 7.649598  | 15.820209 |
| H | 14.560964 | 6.823320  | 12.769411 | C  | 11.980683 | 8.737959  | 14.140258 |
| H | 14.572919 | 5.094532  | 13.112237 | H  | 12.746611 | 9.240767  | 14.726096 |
| C | 16.403076 | 5.512036  | 11.116070 | C  | 11.911124 | 8.992592  | 12.768779 |
| H | 16.694217 | 4.620413  | 11.683411 | C  | 8.730631  | 7.032803  | 11.933958 |
| H | 16.805431 | 6.390092  | 11.634311 | H  | 8.963991  | 6.281028  | 11.174257 |
| H | 16.875892 | 5.455465  | 10.132412 | H  | 8.166371  | 7.824050  | 11.442218 |
| C | 11.236359 | 12.194862 | 4.863488  | H  | 8.055286  | 6.552567  | 12.646929 |
| C | 12.389180 | 12.389055 | 4.060089  | C  | 12.930791 | 9.947999  | 12.210830 |
| C | 12.244816 | 13.058311 | 2.842873  | H  | 12.552726 | 10.559013 | 11.380618 |
| H | 13.115416 | 13.219105 | 2.216219  | H  | 13.812575 | 9.429378  | 11.821453 |
| C | 11.003466 | 13.502098 | 2.402401  | H  | 13.242354 | 10.665013 | 12.974613 |
| H | 10.911390 | 14.007245 | 1.444888  | Mg | 9.562426  | 7.627221  | 8.964856  |
| C | 9.881636  | 13.283788 | 3.188669  | Mg | 10.733193 | 10.517885 | 9.952061  |
| H | 8.911888  | 13.614730 | 2.830748  | N  | 7.870488  | 6.403347  | 8.458216  |
| C | 9.975480  | 12.641362 | 4.428270  | C  | 6.654843  | 6.641782  | 8.951943  |
| C | 13.755661 | 11.868420 | 4.479964  | C  | 6.322021  | 7.792752  | 9.692034  |
| H | 13.586319 | 10.972884 | 5.086595  | H  | 5.358956  | 7.774220  | 10.192343 |
| C | 14.498358 | 12.879000 | 5.367945  | C  | 7.035460  | 8.998423  | 9.806353  |
| H | 14.590325 | 13.845652 | 4.859976  | N  | 8.210724  | 9.184512  | 9.199629  |
| H | 15.509584 | 12.521349 | 5.591989  | C  | 5.492109  | 5.699443  | 8.700219  |
| H | 13.987926 | 13.038861 | 6.320482  | H  | 5.799700  | 4.741132  | 8.285020  |
| C | 14.633587 | 11.464921 | 3.291810  | H  | 4.792825  | 6.157801  | 7.993471  |
| H | 14.123198 | 10.748889 | 2.641314  | H  | 4.943506  | 5.526230  | 9.630876  |
| H | 15.556033 | 11.000637 | 3.651727  | C  | 6.435487  | 10.014491 | 10.753635 |
| H | 14.935104 | 12.329869 | 2.690872  | H  | 6.439709  | 9.578246  | 11.758541 |
| C | 8.714163  | 12.376778 | 5.226659  | H  | 5.392909  | 10.228176 | 10.500638 |

|   |           |           |           |   |           |           |           |
|---|-----------|-----------|-----------|---|-----------|-----------|-----------|
| H | 6.988323  | 10.950032 | 10.794305 | C | 10.833409 | 12.697688 | 12.104940 |
| N | 8.827431  | 10.435896 | 9.251710  | C | 10.156329 | 12.157956 | 13.227707 |
| C | 8.191793  | 11.510541 | 8.801116  | C | 10.714130 | 12.325556 | 14.496257 |
| C | 8.649820  | 12.815632 | 9.104036  | H | 10.212802 | 11.900787 | 15.359645 |
| H | 8.120666  | 13.620168 | 8.603591  | C | 11.905587 | 13.022014 | 14.676550 |
| C | 9.503265  | 13.203269 | 10.154067 | H | 12.327099 | 13.136656 | 15.671516 |
| N | 10.321520 | 12.367655 | 10.810855 | C | 12.542881 | 13.579508 | 13.576421 |
| C | 6.917963  | 11.375675 | 8.007580  | H | 13.464046 | 14.139476 | 13.717139 |
| H | 6.897921  | 10.432449 | 7.457325  | C | 12.025662 | 13.430778 | 12.284514 |
| H | 6.826295  | 12.210096 | 7.315263  | C | 8.813918  | 11.467011 | 13.060800 |
| H | 6.033967  | 11.403800 | 8.650422  | H | 8.839381  | 10.926821 | 12.106934 |
| C | 9.456117  | 14.667147 | 10.534166 | C | 7.693836  | 12.516849 | 12.973189 |
| H | 9.672551  | 14.810372 | 11.595074 | H | 7.704150  | 13.154343 | 13.864566 |
| H | 8.483455  | 15.108633 | 10.308865 | H | 6.713248  | 12.031913 | 12.917356 |
| H | 10.214028 | 15.218440 | 9.965740  | H | 7.802236  | 13.157184 | 12.094583 |
| C | 7.996719  | 5.321637  | 7.536765  | C | 8.496708  | 10.456346 | 14.161203 |
| C | 7.851690  | 5.601592  | 6.154775  | H | 9.329151  | 9.771696  | 14.328010 |
| C | 7.932060  | 4.537769  | 5.253299  | H | 7.622466  | 9.861192  | 13.877879 |
| H | 7.820558  | 4.723195  | 4.190389  | H | 8.254478  | 10.950915 | 15.109329 |
| C | 8.170381  | 3.235744  | 5.686630  | C | 12.772231 | 14.058856 | 11.124408 |
| H | 8.225029  | 2.423678  | 4.966651  | H | 12.222490 | 13.796863 | 10.215222 |
| C | 8.366268  | 2.986576  | 7.037502  | C | 14.194975 | 13.498898 | 11.004175 |
| H | 8.580815  | 1.974816  | 7.369707  | H | 14.657929 | 13.795605 | 10.056655 |
| C | 8.299584  | 4.017095  | 7.982858  | H | 14.195853 | 12.408969 | 11.063911 |
| C | 7.680046  | 7.034525  | 5.661220  | H | 14.832040 | 13.865946 | 11.815865 |
| H | 8.358828  | 7.651837  | 6.266581  | C | 12.822057 | 15.589414 | 11.228673 |
| C | 8.081195  | 7.206813  | 4.194835  | H | 13.413183 | 15.900384 | 12.096876 |
| H | 9.092346  | 6.838312  | 4.003626  | H | 11.825521 | 16.023649 | 11.337427 |
| H | 8.051156  | 8.267535  | 3.931306  | H | 13.290708 | 16.020786 | 10.337070 |
| H | 7.385923  | 6.695662  | 3.519120  | O | 10.689311 | 7.894273  | 7.304181  |
| C | 6.260829  | 7.589977  | 5.860713  | C | 10.935980 | 6.676079  | 6.630224  |
| H | 5.515097  | 6.920856  | 5.416775  | H | 10.378040 | 5.809277  | 6.971776  |
| H | 6.169980  | 8.565442  | 5.369472  | C | 11.422693 | 6.708005  | 5.341127  |
| H | 6.021084  | 7.733467  | 6.914923  | H | 11.534491 | 5.752422  | 4.829881  |
| C | 8.540338  | 3.699734  | 9.449459  | N | 11.727233 | 7.865444  | 4.715879  |
| H | 8.685005  | 4.655010  | 9.963237  | C | 12.432638 | 7.872804  | 3.499173  |
| C | 7.338785  | 3.001188  | 10.101900 | C | 13.597363 | 7.096709  | 3.273711  |
| H | 6.443741  | 3.625897  | 10.091524 | C | 14.290630 | 7.245889  | 2.066855  |
| H | 7.104984  | 2.066864  | 9.578323  | H | 15.192131 | 6.656367  | 1.911816  |
| H | 7.565054  | 2.754497  | 11.145194 | C | 13.865437 | 8.127633  | 1.080182  |
| C | 9.801624  | 2.851413  | 9.650981  | H | 14.425091 | 8.232115  | 0.154909  |
| H | 10.665845 | 3.267297  | 9.131703  | C | 12.707310 | 8.871026  | 1.295298  |
| H | 10.056527 | 2.793517  | 10.713241 | H | 12.348410 | 9.553812  | 0.528441  |
| H | 9.658613  | 1.827011  | 9.289251  | C | 11.984710 | 8.754645  | 2.482945  |



|    |           |           |           |   |           |           |           |
|----|-----------|-----------|-----------|---|-----------|-----------|-----------|
| C  | 13.874880 | 11.538640 | 4.615582  | C | 6.445781  | 7.714739  | 9.961230  |
| H  | 13.675362 | 10.680562 | 5.266623  | H | 5.503638  | 7.656677  | 10.495072 |
| C  | 14.664773 | 12.564717 | 5.442833  | C | 7.111902  | 8.955324  | 10.045532 |
| H  | 14.780028 | 13.500067 | 4.883857  | N | 8.258564  | 9.179215  | 9.407529  |
| H  | 15.666572 | 12.186149 | 5.672810  | C | 5.769608  | 5.496378  | 9.073627  |
| H  | 14.169392 | 12.793019 | 6.390296  | H | 6.172137  | 4.501757  | 9.278020  |
| C  | 14.717069 | 11.036335 | 3.440744  | H | 5.399876  | 5.471319  | 8.044418  |
| H  | 14.157122 | 10.336085 | 2.816314  | H | 4.920626  | 5.682297  | 9.734357  |
| H  | 15.608145 | 10.522636 | 3.813605  | C | 6.493827  | 9.965783  | 10.982863 |
| H  | 15.073216 | 11.859384 | 2.811338  | H | 6.663592  | 9.612201  | 12.006079 |
| C  | 8.880609  | 12.326076 | 5.410041  | H | 5.413047  | 10.036154 | 10.832721 |
| H  | 9.165625  | 12.104412 | 6.443894  | H | 6.929268  | 10.958537 | 10.900808 |
| C  | 8.118940  | 11.110214 | 4.859056  | N | 8.819375  | 10.460617 | 9.412546  |
| H  | 7.148082  | 10.984853 | 5.344194  | C | 8.162751  | 11.463478 | 8.848707  |
| H  | 8.692741  | 10.190907 | 5.013689  | C | 8.602478  | 12.803079 | 8.997334  |
| H  | 7.950149  | 11.213858 | 3.781931  | H | 8.083112  | 13.532430 | 8.386101  |
| C  | 8.009296  | 13.586489 | 5.425409  | C | 9.432882  | 13.329312 | 10.000438 |
| H  | 7.607635  | 13.819963 | 4.434447  | N | 10.197326 | 12.592448 | 10.825663 |
| H  | 8.579508  | 14.454844 | 5.770590  | C | 6.892918  | 11.212090 | 8.078891  |
| H  | 7.149702  | 13.461341 | 6.089682  | H | 6.930756  | 10.246733 | 7.568006  |
| C  | 12.288131 | 7.970396  | 10.709332 | H | 6.725698  | 12.009404 | 7.356573  |
| H  | 12.940971 | 8.495555  | 10.013950 | H | 6.022564  | 11.196505 | 8.741755  |
| N  | 10.955680 | 8.638419  | 10.783918 | C | 9.432664  | 14.837428 | 10.131953 |
| C  | 10.575896 | 8.707669  | 12.180543 | H | 9.520051  | 15.147768 | 11.175431 |
| C  | 9.606059  | 7.853777  | 12.760066 | H | 8.531152  | 15.281219 | 9.705689  |
| C  | 9.307067  | 7.963222  | 14.122387 | H | 10.296915 | 15.245768 | 9.596150  |
| H  | 8.569362  | 7.286194  | 14.546786 | C | 8.159284  | 5.328541  | 7.782408  |
| C  | 9.953262  | 8.876812  | 14.944790 | C | 7.738670  | 5.555196  | 6.451134  |
| H  | 9.710118  | 8.938453  | 16.001867 | C | 7.733184  | 4.470403  | 5.570047  |
| C  | 10.918190 | 9.707262  | 14.392225 | H | 7.398525  | 4.609560  | 4.546554  |
| H  | 11.431870 | 10.436403 | 15.013257 | C | 8.181868  | 3.215266  | 5.972496  |
| C  | 11.245951 | 9.628258  | 13.036020 | H | 8.166829  | 2.382367  | 5.274709  |
| C  | 8.946036  | 6.753729  | 11.987478 | C | 8.714139  | 3.046375  | 7.246975  |
| H  | 9.677770  | 6.189388  | 11.409276 | H | 9.140180  | 2.087324  | 7.524121  |
| H  | 8.153503  | 7.117834  | 11.329962 | C | 8.737286  | 4.100309  | 8.166195  |
| H  | 8.471457  | 6.040027  | 12.666063 | C | 7.429768  | 6.969395  | 5.970009  |
| C  | 12.411283 | 10.472630 | 12.588767 | H | 8.035272  | 7.636642  | 6.597915  |
| H  | 12.347147 | 10.874938 | 11.568933 | C | 7.867561  | 7.181774  | 4.517828  |
| H  | 13.342179 | 9.894348  | 12.598924 | H | 8.906861  | 6.875567  | 4.369590  |
| H  | 12.532050 | 11.342616 | 13.235946 | H | 7.778226  | 8.240488  | 4.256728  |
| Mg | 9.672894  | 7.693603  | 9.115288  | H | 7.238461  | 6.627954  | 3.811978  |
| Mg | 10.701092 | 10.669142 | 10.161222 | C | 5.963273  | 7.394170  | 6.133391  |
| N  | 8.045896  | 6.397797  | 8.714845  | H | 5.290953  | 6.675818  | 5.649853  |
| C  | 6.827507  | 6.569789  | 9.239187  | H | 5.802549  | 8.371139  | 5.662527  |

|   |           |           |           |                    |                |           |           |
|---|-----------|-----------|-----------|--------------------|----------------|-----------|-----------|
| H | 5.679064  | 7.489055  | 7.183250  | H                  | 11.590957      | 5.833093  | 4.763498  |
| C | 9.419081  | 3.958121  | 9.516331  | N                  | 11.766212      | 7.940196  | 4.789313  |
| H | 9.865112  | 4.932598  | 9.745636  | C                  | 12.395478      | 8.001173  | 3.525039  |
| C | 8.440915  | 3.630454  | 10.649901 | C                  | 13.626764      | 7.362105  | 3.257347  |
| H | 7.701679  | 4.422628  | 10.785012 | C                  | 14.216652      | 7.514057  | 1.996662  |
| H | 7.912618  | 2.691952  | 10.444265 | H                  | 15.170171      | 7.025261  | 1.806906  |
| H | 8.984044  | 3.518343  | 11.594081 | C                  | 13.620574      | 8.279533  | 1.002529  |
| C | 10.577638 | 2.961096  | 9.507330  | H                  | 14.097102      | 8.391460  | 0.032568  |
| H | 11.266389 | 3.141881  | 8.677637  | C                  | 12.404614      | 8.905695  | 1.268860  |
| H | 11.152687 | 3.065021  | 10.429835 | H                  | 11.921208      | 9.504417  | 0.500450  |
| H | 10.232547 | 1.923185  | 9.436057  | C                  | 11.782602      | 8.776101  | 2.511010  |
| C | 10.589650 | 13.139338 | 12.089263 | C                  | 14.339119      | 6.531353  | 4.286843  |
| C | 9.749871  | 12.892858 | 13.206389 | H                  | 14.217129      | 5.460853  | 4.087755  |
| C | 10.178706 | 13.303076 | 14.470710 | H                  | 13.970522      | 6.722093  | 5.293740  |
| H | 9.553083  | 13.106837 | 15.335193 | H                  | 15.413619      | 6.736318  | 4.286856  |
| C | 11.397709 | 13.951110 | 14.650709 | C                  | 10.464113      | 9.441637  | 2.765345  |
| H | 11.714393 | 14.253927 | 15.645096 | H                  | 10.562070      | 10.238049 | 3.506571  |
| C | 12.196572 | 14.219923 | 13.547512 | H                  | 9.730531       | 8.730490  | 3.151544  |
| H | 13.139439 | 14.744579 | 13.681152 | H                  | 10.067306      | 9.899804  | 1.855698  |
| C | 11.808827 | 13.828223 | 12.261643 | C                  | 13.625583      | 2.889579  | 7.311585  |
| C | 8.396940  | 12.222434 | 13.027563 | C                  | 13.292295      | 3.317825  | 5.895023  |
| H | 8.537801  | 11.437293 | 12.274606 | H                  | 13.524424      | 4.384148  | 5.820715  |
| C | 7.349251  | 13.218336 | 12.499726 | C                  | 11.798488      | 3.147128  | 5.600551  |
| H | 7.273485  | 14.078471 | 13.174664 | H                  | 11.182805      | 3.715491  | 6.301189  |
| H | 6.363564  | 12.741672 | 12.452926 | H                  | 11.557653      | 3.483628  | 4.585843  |
| H | 7.583545  | 13.583860 | 11.499896 | H                  | 11.490673      | 2.098972  | 5.680152  |
| C | 7.843933  | 11.573055 | 14.297024 | C                  | 14.137769      | 2.572195  | 4.855354  |
| H | 8.572641  | 10.913652 | 14.768026 | H                  | 15.207597      | 2.674612  | 5.057965  |
| H | 6.962233  | 10.973953 | 14.047468 | H                  | 13.903150      | 1.501885  | 4.850682  |
| H | 7.522910  | 12.325543 | 15.027176 | H                  | 13.940253      | 2.957552  | 3.848631  |
| C | 12.706698 | 14.166799 | 11.089648 | C                  | 12.028463      | 6.548547  | 10.178286 |
| H | 12.210563 | 13.767176 | 10.201114 | O                  | 11.866043      | 5.659787  | 11.021077 |
| C | 14.087634 | 13.510380 | 11.206096 | H                  | 12.780051      | 7.918279  | 11.688871 |
| H | 14.670286 | 13.663108 | 10.290683 |                    |                |           |           |
| H | 14.009849 | 12.436288 | 11.385653 | INT-9.log          |                |           |           |
| H | 14.657209 | 13.937891 | 12.038032 |                    |                |           |           |
| C | 12.863142 | 15.682653 | 10.906749 | SCF (B3PW91) =     | -4125.23188811 |           |           |
| H | 13.416433 | 16.121904 | 11.743885 | E(SCF)+ZPE(0 K)=   | -4123.331225   |           |           |
| H | 11.894667 | 16.185944 | 10.852768 | H(298 K)=          | -4123.218828   |           |           |
| H | 13.419553 | 15.905117 | 9.989207  | G(298 K)=          | -4123.474605   |           |           |
| O | 10.614571 | 7.797086  | 7.340852  | Lowest Frequency = | 14.5297cm-1    |           |           |
| C | 10.922370 | 6.625770  | 6.612217  |                    |                |           |           |
| H | 10.320850 | 5.748817  | 6.836159  | Mg                 | 12.554124      | 6.668027  | 7.898073  |
| C | 11.445883 | 6.751850  | 5.332918  | Mg                 | 11.629507      | 9.310286  | 5.776916  |

|   |           |           |           |   |           |           |           |
|---|-----------|-----------|-----------|---|-----------|-----------|-----------|
| N | 14.139313 | 5.378585  | 8.126763  | H | 15.806890 | 5.941875  | 11.916526 |
| C | 15.395669 | 5.643102  | 7.746141  | H | 16.124364 | 5.312751  | 10.295690 |
| C | 15.848605 | 6.888516  | 7.275807  | C | 11.194026 | 12.032406 | 4.703680  |
| H | 16.891314 | 6.925581  | 6.981498  | C | 12.330668 | 12.307437 | 3.905314  |
| C | 15.120891 | 8.083895  | 7.079328  | C | 12.139197 | 12.889368 | 2.649526  |
| N | 13.830454 | 8.160002  | 7.356803  | H | 13.000950 | 13.111308 | 2.026865  |
| C | 16.423021 | 4.531331  | 7.748467  | C | 10.863029 | 13.178362 | 2.179442  |
| H | 16.203245 | 3.769106  | 8.498483  | H | 10.730921 | 13.622415 | 1.196556  |
| H | 17.428779 | 4.921555  | 7.918615  | C | 9.754199  | 12.894757 | 2.970187  |
| H | 16.418419 | 4.038873  | 6.769831  | H | 8.763133  | 13.119949 | 2.589242  |
| C | 15.826892 | 9.282370  | 6.503622  | C | 9.895389  | 12.325935 | 4.239699  |
| H | 16.869946 | 9.060179  | 6.273936  | C | 13.732858 | 11.994556 | 4.403375  |
| H | 15.791434 | 10.136210 | 7.186459  | H | 13.636776 | 11.267910 | 5.217943  |
| H | 15.316235 | 9.590180  | 5.585389  | C | 14.381143 | 13.249928 | 5.003417  |
| N | 13.141286 | 9.376254  | 7.175651  | H | 14.493292 | 14.030378 | 4.241806  |
| C | 13.139013 | 10.245339 | 8.173114  | H | 15.374667 | 13.017572 | 5.402899  |
| C | 12.361171 | 11.437095 | 8.146175  | H | 13.774474 | 13.657577 | 5.817509  |
| H | 12.483032 | 12.079740 | 9.010003  | C | 14.627341 | 11.365058 | 3.330674  |
| C | 11.688422 | 12.007717 | 7.052094  | H | 14.171753 | 10.466137 | 2.904827  |
| N | 11.404083 | 11.334394 | 5.928307  | H | 15.593257 | 11.086953 | 3.765831  |
| C | 13.984413 | 10.028510 | 9.402913  | H | 14.837116 | 12.059134 | 2.509588  |
| H | 14.394966 | 9.020526  | 9.437003  | C | 8.677330  | 11.961785 | 5.070484  |
| H | 13.387238 | 10.193232 | 10.307718 | H | 8.971887  | 11.994318 | 6.126489  |
| H | 14.814332 | 10.741834 | 9.414291  | C | 8.246349  | 10.525905 | 4.743306  |
| C | 11.269748 | 13.454553 | 7.180771  | H | 7.345130  | 10.236734 | 5.295925  |
| H | 11.231397 | 13.947247 | 6.206827  | H | 9.025103  | 9.794979  | 4.982262  |
| H | 11.944655 | 14.011143 | 7.834706  | H | 8.029221  | 10.429098 | 3.674540  |
| H | 10.266828 | 13.494463 | 7.624178  | C | 7.507787  | 12.930010 | 4.876825  |
| C | 13.788493 | 4.092488  | 8.634136  | H | 7.102924  | 12.881756 | 3.860512  |
| C | 13.696078 | 3.915580  | 10.036855 | H | 7.809088  | 13.963826 | 5.072562  |
| C | 13.254159 | 2.685263  | 10.528142 | H | 6.688129  | 12.675404 | 5.553266  |
| H | 13.179540 | 2.532954  | 11.600317 | C | 11.994281 | 7.984511  | 10.961410 |
| C | 12.884809 | 1.654598  | 9.667664  | H | 13.095141 | 7.872050  | 11.006613 |
| H | 12.534854 | 0.707726  | 10.069820 | N | 11.486592 | 9.128038  | 11.665795 |
| C | 12.957161 | 1.847229  | 8.293209  | C | 11.388701 | 8.864783  | 13.046061 |
| H | 12.658371 | 1.045363  | 7.622487  | C | 10.383978 | 7.994986  | 13.543633 |
| C | 14.060534 | 5.051967  | 10.976622 | C | 10.354963 | 7.681156  | 14.906070 |
| H | 13.778902 | 5.978248  | 10.461487 | H | 9.582053  | 7.011830  | 15.279589 |
| C | 13.317989 | 5.011380  | 12.314685 | C | 11.279526 | 8.232355  | 15.788998 |
| H | 12.242083 | 4.862633  | 12.181458 | H | 11.241228 | 7.986662  | 16.847049 |
| H | 13.459426 | 5.953381  | 12.853615 | C | 12.243309 | 9.117597  | 15.306867 |
| H | 13.689607 | 4.207991  | 12.960689 | H | 12.965239 | 9.557829  | 15.991831 |
| C | 15.574679 | 5.127994  | 11.220696 | C | 12.314990 | 9.435166  | 13.948251 |
| H | 15.941244 | 4.191937  | 11.657037 | C | 9.343679  | 7.417538  | 12.618274 |

|    |           |           |           |   |           |           |           |
|----|-----------|-----------|-----------|---|-----------|-----------|-----------|
| H  | 9.639885  | 6.439589  | 12.215247 | H | 9.240452  | 2.282808  | 7.529899  |
| H  | 9.184016  | 8.068838  | 11.752504 | C | 8.494084  | 4.265750  | 7.890205  |
| H  | 8.388540  | 7.276084  | 13.133180 | C | 7.156281  | 6.694779  | 5.206316  |
| C  | 13.385176 | 10.346986 | 13.420117 | H | 7.101729  | 7.496227  | 5.952201  |
| H  | 12.946191 | 11.234451 | 12.957451 | C | 8.066690  | 7.170065  | 4.068324  |
| H  | 13.977818 | 9.846014  | 12.646227 | H | 9.062817  | 7.413874  | 4.447019  |
| H  | 14.057184 | 10.678153 | 14.217098 | H | 7.647364  | 8.061540  | 3.592660  |
| Mg | 9.128985  | 8.105181  | 7.997446  | H | 8.173835  | 6.406087  | 3.291152  |
| Mg | 10.431191 | 10.387815 | 10.503130 | C | 5.727932  | 6.441954  | 4.705497  |
| N  | 7.721130  | 6.595251  | 8.072818  | H | 5.710730  | 5.642709  | 3.956033  |
| C  | 6.607999  | 6.636078  | 8.821403  | H | 5.316153  | 7.345453  | 4.242230  |
| C  | 6.292767  | 7.663605  | 9.722302  | H | 5.063779  | 6.146957  | 5.523903  |
| H  | 5.412445  | 7.499224  | 10.332671 | C | 8.799460  | 4.215094  | 9.378534  |
| C  | 6.972773  | 8.878624  | 9.960679  | H | 8.190728  | 4.974189  | 9.879523  |
| N  | 7.969214  | 9.300468  | 9.192271  | C | 8.475200  | 2.862238  | 10.020481 |
| C  | 5.620042  | 5.492960  | 8.732980  | H | 7.457832  | 2.535441  | 9.781681  |
| H  | 6.034199  | 4.574413  | 9.161140  | H | 9.168025  | 2.080207  | 9.691894  |
| H  | 5.387267  | 5.268498  | 7.687918  | H | 8.565757  | 2.934845  | 11.109138 |
| H  | 4.693568  | 5.729024  | 9.258476  | C | 10.263765 | 4.586805  | 9.619293  |
| C  | 6.549452  | 9.698957  | 11.153732 | H | 10.450979 | 5.614948  | 9.294163  |
| H  | 5.736644  | 9.214061  | 11.695977 | H | 10.521994 | 4.533615  | 10.681556 |
| H  | 6.239677  | 10.711342 | 10.881998 | H | 10.942473 | 3.919690  | 9.076446  |
| H  | 7.402814  | 9.814822  | 11.829729 | C | 10.858404 | 12.828058 | 12.292673 |
| N  | 8.589857  | 10.516988 | 9.564920  | C | 10.312776 | 12.395844 | 13.527873 |
| C  | 8.044764  | 11.625932 | 9.081871  | C | 10.961196 | 12.758853 | 14.710050 |
| C  | 8.499250  | 12.909745 | 9.438261  | H | 10.565112 | 12.422845 | 15.661877 |
| H  | 7.971481  | 13.734857 | 8.973032  | C | 12.114691 | 13.536762 | 14.694946 |
| C  | 9.403457  | 13.264056 | 10.457692 | H | 12.603724 | 13.805569 | 15.627260 |
| N  | 10.203285 | 12.402402 | 11.093947 | C | 12.638656 | 13.959304 | 13.481602 |
| C  | 6.853076  | 11.536975 | 8.163017  | H | 13.544753 | 14.559519 | 13.468533 |
| H  | 7.035749  | 10.815338 | 7.362877  | C | 12.032417 | 13.612884 | 12.269105 |
| H  | 6.623871  | 12.511198 | 7.731688  | C | 9.028548  | 11.580311 | 13.571193 |
| H  | 5.966164  | 11.183180 | 8.698062  | H | 9.101411  | 10.820172 | 12.781945 |
| C  | 9.395389  | 14.734287 | 10.822239 | C | 7.797804  | 12.448982 | 13.268028 |
| H  | 9.702198  | 14.902708 | 11.855422 | H | 7.732222  | 13.272982 | 13.987439 |
| H  | 8.403798  | 15.166088 | 10.673411 | H | 6.882487  | 11.852807 | 13.353682 |
| H  | 10.093683 | 15.274959 | 10.174219 | H | 7.826191  | 12.869206 | 12.261189 |
| C  | 7.954703  | 5.427112  | 7.285386  | C | 8.817904  | 10.829072 | 14.884863 |
| C  | 7.721298  | 5.464807  | 5.894323  | H | 9.703130  | 10.259039 | 15.171064 |
| C  | 8.023002  | 4.332336  | 5.129660  | H | 7.987598  | 10.124019 | 14.775268 |
| H  | 7.839347  | 4.349827  | 4.058773  | H | 8.557389  | 11.513459 | 15.701143 |
| C  | 8.560469  | 3.192159  | 5.711471  | C | 12.683805 | 14.060630 | 10.974072 |
| H  | 8.805520  | 2.328308  | 5.100121  | H | 12.029932 | 13.746480 | 10.154586 |
| C  | 8.798192  | 3.167958  | 7.082662  | C | 14.041457 | 13.368674 | 10.793079 |





|   |           |           |           |   |           |           |           |
|---|-----------|-----------|-----------|---|-----------|-----------|-----------|
| C | 2.750414  | 10.448728 | 17.773367 | H | 10.623587 | 11.130788 | 10.304038 |
| C | 1.730150  | 10.008194 | 18.619936 | H | 10.853218 | 11.624145 | 11.989494 |
| H | 1.260984  | 10.707850 | 19.304002 | H | 11.606545 | 12.548441 | 10.691162 |
| C | 1.285592  | 8.688061  | 18.589816 | C | 5.732912  | 14.171280 | 7.699062  |
| H | 0.490050  | 8.368624  | 19.257782 | H | 5.260393  | 14.351195 | 8.669296  |
| C | 1.839789  | 7.788872  | 17.686443 | C | 5.003097  | 12.981889 | 7.071148  |
| H | 1.460358  | 6.771496  | 17.641005 | H | 5.432692  | 12.721929 | 6.097133  |
| C | 2.863630  | 8.181069  | 16.818134 | H | 3.937309  | 13.196362 | 6.938720  |
| C | 3.202369  | 11.904546 | 17.758891 | H | 5.097131  | 12.106234 | 7.715924  |
| H | 3.374993  | 12.158532 | 16.703607 | C | 5.568498  | 15.434671 | 6.848003  |
| C | 2.147240  | 12.870592 | 18.298474 | H | 6.133240  | 16.276397 | 7.261050  |
| H | 1.172312  | 12.701428 | 17.840358 | H | 4.513808  | 15.724257 | 6.795280  |
| H | 2.444955  | 13.901169 | 18.081376 | H | 5.914658  | 15.276130 | 5.820933  |
| H | 2.043467  | 12.785308 | 19.386948 | N | 4.917973  | 6.340815  | 11.306558 |
| C | 4.524507  | 12.134952 | 18.508194 | C | 4.070066  | 5.330215  | 11.557302 |
| H | 4.452885  | 11.764766 | 19.537406 | C | 2.674120  | 5.452126  | 11.528596 |
| H | 4.744697  | 13.207603 | 18.552431 | H | 2.112045  | 4.582832  | 11.851363 |
| H | 5.370868  | 11.649921 | 18.020527 | C | 1.894807  | 6.528434  | 11.029724 |
| C | 3.386185  | 7.222796  | 15.761326 | N | 2.448097  | 7.650473  | 10.603222 |
| H | 4.290594  | 7.664984  | 15.330977 | C | 4.631072  | 3.963056  | 11.880389 |
| C | 3.760815  | 5.850306  | 16.328760 | H | 5.362338  | 3.659813  | 11.124909 |
| H | 4.487968  | 5.934478  | 17.143015 | H | 3.843254  | 3.209585  | 11.927467 |
| H | 4.196309  | 5.223698  | 15.543805 | H | 5.158359  | 3.973844  | 12.839612 |
| H | 2.885275  | 5.319953  | 16.718687 | C | 0.397807  | 6.349187  | 10.976919 |
| C | 2.368889  | 7.070430  | 14.621804 | H | -0.101276 | 7.312775  | 11.105688 |
| H | 1.416866  | 6.679646  | 14.999524 | H | 0.071429  | 5.656350  | 11.756122 |
| H | 2.740166  | 6.385264  | 13.853347 | H | 0.073708  | 5.940501  | 10.013894 |
| H | 2.160199  | 8.022504  | 14.123852 | N | 1.646659  | 8.617555  | 9.968424  |
| C | 7.642558  | 13.555136 | 9.269997  | C | 1.406057  | 8.448507  | 8.673686  |
| C | 8.995133  | 13.213764 | 9.507713  | C | 0.738011  | 9.421068  | 7.886238  |
| C | 9.874170  | 13.179920 | 8.423706  | H | 0.502498  | 9.116127  | 6.872275  |
| H | 10.916628 | 12.923504 | 8.585669  | C | 0.266864  | 10.685510 | 8.280162  |
| C | 9.433585  | 13.447779 | 7.130333  | N | 0.632043  | 11.283109 | 9.415949  |
| H | 10.130790 | 13.405231 | 6.297813  | C | 1.870317  | 7.191951  | 7.973244  |
| C | 8.098122  | 13.758405 | 6.907463  | H | 2.875977  | 6.922509  | 8.310092  |
| H | 7.754261  | 13.954964 | 5.895308  | H | 1.874223  | 7.328989  | 6.890429  |
| C | 7.186024  | 13.826924 | 7.965534  | H | 1.228448  | 6.335848  | 8.204765  |
| C | 9.457526  | 12.878828 | 10.916032 | C | -0.725757 | 11.371191 | 7.368014  |
| H | 8.625488  | 12.331027 | 11.374216 | H | -1.743028 | 11.248734 | 7.757890  |
| C | 9.702319  | 14.130574 | 11.773528 | H | -0.701011 | 10.948143 | 6.361469  |
| H | 10.431731 | 14.789551 | 11.289117 | H | -0.536860 | 12.446321 | 7.313572  |
| H | 10.103550 | 13.844489 | 12.752373 | C | 6.308901  | 6.075678  | 11.164149 |
| H | 8.786044  | 14.695442 | 11.949912 | C | 6.855436  | 5.997661  | 9.858278  |
| C | 10.703667 | 11.992784 | 10.969186 | C | 8.236594  | 5.829383  | 9.726761  |

|   |           |           |           |   |           |           |           |
|---|-----------|-----------|-----------|---|-----------|-----------|-----------|
| H | 8.679708  | 5.770979  | 8.738847  | H | -1.775091 | 10.535100 | 12.793319 |
| C | 9.068064  | 5.752312  | 10.840642 | C | 1.721459  | 14.011754 | 9.243584  |
| H | 10.139977 | 5.628404  | 10.711814 | H | 2.216184  | 13.067468 | 8.987334  |
| C | 8.522423  | 5.846615  | 12.113849 | C | 2.694648  | 14.811956 | 10.113849 |
| H | 9.176351  | 5.807628  | 12.980794 | H | 2.283361  | 15.784027 | 10.408285 |
| C | 7.145012  | 6.007085  | 12.298357 | H | 3.621122  | 15.004185 | 9.564507  |
| C | 5.961717  | 6.122168  | 8.630813  | H | 2.964293  | 14.256726 | 11.014615 |
| H | 5.302279  | 6.983393  | 8.811438  | C | 1.422641  | 14.762972 | 7.938604  |
| C | 6.739466  | 6.395924  | 7.343106  | H | 0.781638  | 14.176173 | 7.274012  |
| H | 7.307791  | 5.513264  | 7.026505  | H | 2.349490  | 14.989157 | 7.400022  |
| H | 7.429619  | 7.235496  | 7.449853  | H | 0.912484  | 15.711392 | 8.143214  |
| H | 6.041512  | 6.637085  | 6.535733  | C | 1.531469  | 11.407275 | 12.567829 |
| C | 5.061330  | 4.893917  | 8.423713  | H | 0.590737  | 11.982100 | 12.441517 |
| H | 5.666680  | 3.982777  | 8.356817  | C | 4.084944  | 10.214349 | 9.712562  |
| H | 4.501119  | 4.993698  | 7.487097  | H | 3.991003  | 10.726305 | 8.741537  |
| H | 4.334625  | 4.772634  | 9.228054  | N | 5.277141  | 9.652395  | 9.944066  |
| C | 6.593203  | 6.187495  | 13.699598 | C | 6.345624  | 9.687447  | 9.003434  |
| H | 5.504690  | 6.078402  | 13.652908 | C | 7.651348  | 9.671932  | 9.542945  |
| C | 7.131567  | 5.148490  | 14.689686 | C | 8.738333  | 9.772766  | 8.676119  |
| H | 6.979572  | 4.126830  | 14.326725 | H | 9.743983  | 9.755185  | 9.082981  |
| H | 6.625365  | 5.248629  | 15.654819 | C | 8.550787  | 9.889129  | 7.302114  |
| H | 8.203721  | 5.279407  | 14.871365 | H | 9.405392  | 10.002293 | 6.642471  |
| C | 6.879564  | 7.605221  | 14.201168 | C | 7.266296  | 9.814646  | 6.778570  |
| H | 7.950126  | 7.833923  | 14.158717 | H | 7.121313  | 9.823051  | 5.701016  |
| H | 6.558839  | 7.717559  | 15.238462 | C | 6.145490  | 9.670009  | 7.603272  |
| H | 6.352311  | 8.365016  | 13.614612 | C | 7.868912  | 9.480455  | 11.020810 |
| C | -0.117754 | 12.369007 | 9.935413  | H | 7.242366  | 10.124032 | 11.648009 |
| C | -1.349553 | 12.093302 | 10.581759 | H | 8.910060  | 9.666266  | 11.292592 |
| C | -1.994351 | 13.124109 | 11.268475 | H | 7.625651  | 8.451435  | 11.307791 |
| H | -2.922653 | 12.918119 | 11.793575 | C | 4.816416  | 9.377135  | 6.949693  |
| C | -1.458141 | 14.407935 | 11.314074 | H | 4.166197  | 8.784336  | 7.598212  |
| H | -1.970225 | 15.195508 | 11.859958 | H | 4.982590  | 8.805478  | 6.031848  |
| C | -0.263980 | 14.673523 | 10.654988 | H | 4.258412  | 10.277110 | 6.671434  |
| H | 0.142678  | 15.681199 | 10.676265 | N | 1.934111  | 11.438677 | 13.809506 |
| C | 0.429031  | 13.670934 | 9.966680  | C | 1.078523  | 12.163945 | 14.713786 |
| C | -1.920967 | 10.682343 | 10.622478 | C | 0.147069  | 11.440205 | 15.478261 |
| H | -1.498922 | 10.114168 | 9.789032  | C | 0.186244  | 14.242262 | 15.534794 |
| C | -3.445267 | 10.650450 | 10.468762 | C | -0.768111 | 12.152000 | 16.257345 |
| H | -3.956402 | 11.068948 | 11.342687 | C | -0.750648 | 13.545464 | 16.290378 |
| H | -3.790429 | 9.617024  | 10.357799 | H | 0.197072  | 15.329617 | 15.549275 |
| H | -3.769169 | 11.216056 | 9.588827  | H | -1.500301 | 11.601596 | 16.842931 |
| C | -1.484244 | 9.962280  | 11.905843 | H | -1.463402 | 14.084931 | 16.907962 |
| H | -0.398033 | 9.827786  | 11.924547 | C | 0.104251  | 9.943210  | 15.397054 |
| H | -1.942645 | 8.968612  | 11.970348 | H | -0.176466 | 9.609001  | 14.392983 |

H 1.084011 9.513884 15.613259  
H -0.605547 9.526868 16.114773  
C 1.104092 13.567509 14.721423  
C 2.005364 14.339054 13.796915  
H 2.295453 15.299611 14.232259  
H 2.909033 13.785388 13.536734  
H 1.482040 14.541822 12.855112

TS2.log

SCF (B3PW91) = -4011.78113084

E(SCF)+ZPE(0 K)= -4009.896481

H(298 K)= -4009.786260

G(298 K)= -4010.033827

Lowest Frequency = -104.0887cm-1

Mg 3.769513 10.370759 14.376570  
Mg 5.848851 11.247175 10.891295  
Mg 4.418702 8.211949 9.968295  
Mg 2.138987 10.795890 10.607173  
H 4.195000 10.314666 10.478632  
N 4.512630 9.708711 16.187573  
C 5.812017 9.562469 16.474838  
C 6.863097 10.005283 15.653871  
H 7.863978 9.823070 16.027344  
C 6.785832 10.825540 14.507644  
N 5.648999 11.036532 13.854591  
C 6.205516 8.941300 17.797822  
H 5.747568 9.486992 18.628663  
H 7.288104 8.940469 17.933504  
H 5.844699 7.910141 17.866675  
C 8.038960 11.548845 14.074327  
H 8.152111 11.555463 12.987020  
H 8.925270 11.103024 14.527478  
H 7.989011 12.598385 14.385045  
N 5.702306 11.981177 12.797902  
C 5.459893 13.246003 13.133174  
C 5.437445 14.296753 12.193221  
H 5.160096 15.265905 12.590432  
C 5.789995 14.275258 10.836766  
N 6.106063 13.165362 10.153345  
C 5.154128 13.594207 14.568013  
H 4.200161 13.134209 14.851633  
H 5.066188 14.673046 14.700324

H 5.909114 13.211870 15.258779  
C 5.844966 15.626100 10.153307  
H 6.841776 16.066158 10.252717  
H 5.134244 16.314450 10.614029  
H 5.630272 15.550773 9.085051  
C 3.558140 9.504972 17.230965  
C 3.053846 10.642874 17.909161  
C 2.066410 10.453081 18.878461  
H 1.659838 11.311578 19.402351  
C 1.568232 9.185818 19.163930  
H 0.792975 9.062283 19.915333  
C 2.047353 8.082861 18.468072  
H 1.630373 7.101463 18.674134  
C 3.041219 8.218861 17.493995  
C 3.534027 12.041002 17.548290  
H 3.631067 12.060300 16.456911  
C 2.545624 13.150044 17.913246  
H 1.540053 12.934276 17.544935  
H 2.871106 14.090329 17.457032  
H 2.499654 13.312956 18.996828  
C 4.918022 12.356483 18.133028  
H 4.904513 12.262167 19.224963  
H 5.204214 13.385505 17.887500  
H 5.692254 11.696559 17.736700  
C 3.474572 7.014902 16.675818  
H 4.450989 7.245871 16.237978  
C 3.634135 5.746484 17.520490  
H 4.288749 5.920343 18.380713  
H 4.064376 4.936537 16.922818  
H 2.672183 5.385254 17.898866  
C 2.495709 6.783361 15.514420  
H 1.486942 6.590042 15.895150  
H 2.801064 5.925194 14.905446  
H 2.432447 7.653476 14.853793  
C 6.700251 13.324449 8.868524  
C 8.037326 13.783207 8.763277  
C 8.615338 13.859741 7.493701  
H 9.645402 14.192141 7.399216  
C 7.900282 13.524688 6.347751  
H 8.367913 13.600987 5.369987  
C 6.588105 13.082454 6.463149  
H 6.036057 12.805711 5.568976  
C 5.972119 12.960971 7.713464  
C 8.856018 14.183132 9.984895

|   |           |           |           |   |           |           |           |
|---|-----------|-----------|-----------|---|-----------|-----------|-----------|
| H | 8.173234  | 14.299851 | 10.830485 | H | -1.751437 | 12.556644 | 8.431041  |
| C | 9.579330  | 15.522217 | 9.784320  | H | -1.168801 | 12.159084 | 6.801822  |
| H | 10.399641 | 15.433783 | 9.063687  | H | -0.535337 | 13.567060 | 7.673407  |
| H | 10.014943 | 15.860782 | 10.730196 | C | 5.723299  | 5.647393  | 10.515317 |
| H | 8.903291  | 16.301934 | 9.419168  | C | 6.473908  | 5.266374  | 9.383288  |
| C | 9.856694  | 13.093194 | 10.381340 | C | 7.826420  | 4.955494  | 9.550900  |
| H | 9.352581  | 12.156621 | 10.629458 | H | 8.425153  | 4.685671  | 8.684873  |
| H | 10.439049 | 13.409217 | 11.254178 | C | 8.421125  | 4.998080  | 10.808401 |
| H | 10.553955 | 12.879675 | 9.565580  | H | 9.476311  | 4.765522  | 10.921208 |
| C | 4.573688  | 12.371425 | 7.799427  | C | 7.655073  | 5.324088  | 11.924955 |
| H | 4.223042  | 12.481582 | 8.834269  | H | 8.120857  | 5.328393  | 12.906574 |
| C | 4.617539  | 10.871326 | 7.472105  | C | 6.300995  | 5.649325  | 11.803304 |
| H | 4.929751  | 10.709212 | 6.434456  | C | 5.838044  | 5.241008  | 8.002969  |
| H | 3.630925  | 10.424025 | 7.613454  | H | 4.755459  | 5.329412  | 8.141836  |
| H | 5.330245  | 10.342835 | 8.114083  | C | 6.287822  | 6.440959  | 7.156713  |
| C | 3.561473  | 13.085896 | 6.898910  | H | 7.375698  | 6.442757  | 7.025393  |
| H | 3.499238  | 14.151796 | 7.137911  | H | 6.015145  | 7.391463  | 7.629166  |
| H | 2.570240  | 12.637726 | 7.025576  | H | 5.824253  | 6.413522  | 6.164354  |
| H | 3.829542  | 12.995127 | 5.840751  | C | 6.106088  | 3.923295  | 7.266857  |
| N | 4.415599  | 6.177072  | 10.336148 | H | 7.166965  | 3.802196  | 7.022288  |
| C | 3.351024  | 5.378384  | 10.444861 | H | 5.547261  | 3.891559  | 6.325429  |
| C | 2.032709  | 5.832478  | 10.297075 | H | 5.803619  | 3.063477  | 7.873140  |
| H | 1.250708  | 5.110711  | 10.500964 | C | 5.462817  | 6.003352  | 13.021329 |
| C | 1.595765  | 7.118352  | 9.922399  | H | 4.411923  | 5.876474  | 12.743319 |
| N | 2.435400  | 8.091670  | 9.564934  | C | 5.741854  | 5.074010  | 14.206095 |
| C | 3.563560  | 3.913209  | 10.743063 | H | 5.640195  | 4.021833  | 13.921586 |
| H | 4.172811  | 3.456064  | 9.955332  | H | 5.040264  | 5.278437  | 15.017860 |
| H | 2.618172  | 3.372952  | 10.811871 | H | 6.749843  | 5.218531  | 14.609417 |
| H | 4.115634  | 3.778634  | 11.679161 | C | 5.632896  | 7.467814  | 13.440527 |
| C | 0.114242  | 7.394600  | 9.953912  | H | 6.622336  | 7.654325  | 13.864048 |
| H | -0.067019 | 8.271055  | 10.581705 | H | 4.898936  | 7.733329  | 14.207540 |
| H | -0.431428 | 6.542727  | 10.361986 | H | 5.503367  | 8.159547  | 12.600859 |
| H | -0.291783 | 7.627051  | 8.965201  | C | -0.112231 | 12.860424 | 10.405952 |
| N | 1.846410  | 9.328062  | 9.230231  | C | -1.061593 | 12.425205 | 11.360491 |
| C | 1.407465  | 9.475035  | 7.986254  | C | -1.720245 | 13.391471 | 12.125738 |
| C | 0.684198  | 10.613132 | 7.582431  | H | -2.427749 | 13.083228 | 12.887312 |
| H | 0.356208  | 10.620565 | 6.549772  | C | -1.463125 | 14.747659 | 11.954641 |
| C | 0.203258  | 11.655753 | 8.395376  | H | -1.982108 | 15.478913 | 12.567765 |
| N | 0.605332  | 11.877465 | 9.653592  | C | -0.517450 | 15.160761 | 11.023308 |
| C | 1.668719  | 8.394514  | 6.966085  | H | -0.301033 | 16.219500 | 10.914136 |
| H | 2.714124  | 8.072951  | 7.018885  | C | 0.180831  | 14.230721 | 10.248429 |
| H | 1.449294  | 8.750938  | 5.958303  | C | -1.330470 | 10.942156 | 11.566633 |
| H | 1.063428  | 7.502556  | 7.155706  | H | -0.358934 | 10.431786 | 11.550792 |
| C | -0.870233 | 12.531464 | 7.782811  | C | -2.174355 | 10.345840 | 10.429597 |

|   |           |           |           |                    |                |           |           |
|---|-----------|-----------|-----------|--------------------|----------------|-----------|-----------|
| H | -3.122233 | 10.887390 | 10.332395 | H                  | -1.313190      | 11.365747 | 16.898382 |
| H | -2.406409 | 9.296327  | 10.641805 | H                  | -1.732695      | 13.817390 | 16.804376 |
| H | -1.653003 | 10.379942 | 9.470847  | C                  | 0.504366       | 9.922055  | 15.567623 |
| C | -1.967916 | 10.614347 | 12.917036 | H                  | 1.428771       | 9.616896  | 16.061387 |
| H | -1.426266 | 11.078961 | 13.744527 | H                  | -0.316080      | 9.452493  | 16.117637 |
| H | -1.958058 | 9.530754  | 13.071920 | H                  | 0.523526       | 9.512322  | 14.555755 |
| H | -3.013627 | 10.941322 | 12.960871 | C                  | 0.926728       | 13.617981 | 14.664263 |
| C | 1.296457  | 14.671082 | 9.321631  | C                  | 1.753182       | 14.551565 | 13.818856 |
| H | 1.421144  | 13.899564 | 8.558910  | H                  | 1.799471       | 15.545312 | 14.277379 |
| C | 2.616898  | 14.735008 | 10.090839 | H                  | 2.770052       | 14.190993 | 13.672154 |
| H | 2.596873  | 15.524281 | 10.849619 | H                  | 1.312154       | 14.670467 | 12.824087 |
| H | 3.444982  | 14.934261 | 9.407675  | C                  | 2.427356       | 9.687235  | 12.753589 |
| H | 2.831045  | 13.799649 | 10.614651 | O                  | 1.488115       | 9.049990  | 12.375499 |
| C | 1.023849  | 15.990122 | 8.595780  | C                  | 2.282336       | 11.852258 | 12.605271 |
| H | 0.057379  | 15.974242 | 8.081224  | H                  | 3.183496       | 12.390682 | 12.262340 |
| H | 1.804590  | 16.176388 | 7.850489  | H                  | 1.380434       | 12.372899 | 12.250914 |
| H | 1.023856  | 16.843477 | 9.282661  |                    |                |           |           |
| C | 6.548420  | 8.605534  | 9.875295  | TS3.log            |                |           |           |
| H | 7.253384  | 7.805105  | 9.584329  |                    |                |           |           |
| N | 7.154774  | 9.709704  | 10.200762 | SCF (B3PW91) =     | -4011.80285602 |           |           |
| C | 8.590724  | 9.724899  | 10.104688 | E(SCF)+ZPE(0 K)=   | -4009.920848   |           |           |
| C | 9.358215  | 9.382612  | 11.228231 | H(298 K)=          | -4009.810084   |           |           |
| C | 10.750913 | 9.465067  | 11.130498 | G(298 K)=          | -4010.061221   |           |           |
| H | 11.355020 | 9.216500  | 11.999734 | Lowest Frequency = | -851.7669cm-1  |           |           |
| C | 11.362730 | 9.829156  | 9.935069  |                    |                |           |           |
| H | 12.445596 | 9.891978  | 9.873911  | Mg                 | 12.689130      | 7.089686  | 8.776252  |
| C | 10.583527 | 10.086883 | 8.809978  | Mg                 | 12.467688      | 9.314827  | 6.255252  |
| H | 11.058197 | 10.339798 | 7.865223  | N                  | 13.976915      | 5.466069  | 8.298946  |
| C | 9.189129  | 10.036626 | 8.872173  | C                  | 15.283822      | 5.521776  | 7.998891  |
| C | 8.699005  | 8.824775  | 12.453555 | C                  | 16.012253      | 6.698424  | 7.748145  |
| H | 7.735890  | 9.293876  | 12.655561 | H                  | 17.058713      | 6.572408  | 7.496956  |
| H | 9.329773  | 8.925078  | 13.339868 | C                  | 15.523535      | 8.014580  | 7.706138  |
| H | 8.489858  | 7.760150  | 12.300168 | N                  | 14.282067      | 8.283884  | 8.071466  |
| C | 8.346196  | 10.273996 | 7.654931  | C                  | 16.089706      | 4.238630  | 7.915190  |
| H | 7.802773  | 9.366008  | 7.367516  | H                  | 15.619540      | 3.507069  | 7.253143  |
| H | 8.955109  | 10.592716 | 6.806866  | H                  | 16.148910      | 3.764845  | 8.900312  |
| H | 7.598467  | 11.047417 | 7.837502  | H                  | 17.104091      | 4.432463  | 7.562848  |
| N | 2.239502  | 11.635672 | 14.016032 | C                  | 16.436486      | 9.120655  | 7.240206  |
| C | 1.179465  | 12.220902 | 14.723235 | H                  | 15.898341      | 9.825262  | 6.599352  |
| C | 0.343911  | 11.414932 | 15.541004 | H                  | 17.293165      | 8.722911  | 6.693558  |
| C | -0.121119 | 14.162436 | 15.411649 | H                  | 16.811049      | 9.692292  | 8.096628  |
| C | -0.682863 | 12.003995 | 16.282797 | N                  | 13.741661      | 9.550676  | 7.794998  |
| C | -0.927342 | 13.373723 | 16.225196 | C                  | 13.689079      | 10.470183 | 8.724691  |
| H | -0.295705 | 15.235296 | 15.355420 | C                  | 12.788536      | 11.587173 | 8.604999  |

|   |           |           |           |    |           |           |           |
|---|-----------|-----------|-----------|----|-----------|-----------|-----------|
| H | 12.978983 | 12.373912 | 9.325233  | C  | 15.240535 | 11.112561 | 3.505350  |
| C | 12.227848 | 12.076912 | 7.369963  | H  | 14.768135 | 10.245890 | 3.032737  |
| N | 12.106456 | 11.333200 | 6.289362  | H  | 16.185977 | 10.786272 | 3.951959  |
| C | 14.579523 | 10.382958 | 9.930554  | H  | 15.488827 | 11.837748 | 2.722968  |
| H | 14.766007 | 9.340573  | 10.194460 | C  | 9.300465  | 11.884158 | 5.445346  |
| H | 14.151449 | 10.895633 | 10.787911 | H  | 9.646772  | 11.639798 | 6.455383  |
| H | 15.535628 | 10.863996 | 9.695106  | C  | 8.503763  | 10.681840 | 4.918092  |
| C | 11.781680 | 13.517677 | 7.347782  | H  | 7.586217  | 10.528303 | 5.489858  |
| H | 11.693110 | 13.888818 | 6.325390  | H  | 9.096371  | 9.763520  | 4.981700  |
| H | 12.464811 | 14.161504 | 7.904905  | H  | 8.225673  | 10.819570 | 3.867965  |
| H | 10.792926 | 13.577113 | 7.815762  | C  | 8.420658  | 13.135271 | 5.548346  |
| C | 13.445033 | 4.142759  | 8.398956  | H  | 8.023340  | 13.432530 | 4.572346  |
| C | 13.515088 | 3.446523  | 9.623473  | H  | 8.984253  | 13.981031 | 5.953931  |
| C | 13.167896 | 2.093782  | 9.649182  | H  | 7.564140  | 12.952394 | 6.204201  |
| H | 13.229569 | 1.543530  | 10.584553 | C  | 12.400609 | 8.048292  | 10.785673 |
| C | 12.752472 | 1.440153  | 8.494011  | H  | 12.652673 | 7.246186  | 11.517926 |
| H | 12.513549 | 0.380271  | 8.520765  | N  | 11.858567 | 9.069088  | 11.403912 |
| C | 12.587307 | 2.164627  | 7.318006  | C  | 11.601543 | 8.962447  | 12.814467 |
| H | 12.204631 | 1.662727  | 6.433912  | C  | 10.741074 | 7.954040  | 13.300908 |
| C | 13.897076 | 4.166154  | 10.904652 | C  | 10.568626 | 7.839197  | 14.686171 |
| H | 14.306190 | 5.142894  | 10.622127 | H  | 9.908531  | 7.062174  | 15.064728 |
| C | 12.624299 | 4.413054  | 11.726877 | C  | 11.216666 | 8.690645  | 15.572202 |
| H | 11.878214 | 4.934887  | 11.119598 | H  | 11.071469 | 8.581157  | 16.643191 |
| H | 12.837091 | 5.014759  | 12.618492 | C  | 12.027954 | 9.707193  | 15.074396 |
| H | 12.185486 | 3.462705  | 12.052855 | H  | 12.518712 | 10.396602 | 15.756616 |
| C | 14.959295 | 3.437154  | 11.732560 | C  | 12.223109 | 9.865469  | 13.700883 |
| H | 14.592355 | 2.473998  | 12.104114 | C  | 9.998125  | 6.994114  | 12.407816 |
| H | 15.238898 | 4.037645  | 12.605097 | H  | 10.059692 | 7.260299  | 11.352927 |
| H | 15.865220 | 3.245476  | 11.148760 | H  | 8.938922  | 6.958947  | 12.681092 |
| C | 11.825018 | 11.871270 | 4.997734  | H  | 10.394936 | 5.979820  | 12.510135 |
| C | 12.923094 | 11.999938 | 4.111256  | C  | 13.141452 | 10.947189 | 13.209043 |
| C | 12.680850 | 12.423812 | 2.804310  | H  | 12.746511 | 11.450914 | 12.323565 |
| H | 13.511087 | 12.528989 | 2.113304  | H  | 14.125807 | 10.541397 | 12.949699 |
| C | 11.389339 | 12.705847 | 2.368633  | H  | 13.274346 | 11.722028 | 13.967332 |
| H | 11.217330 | 13.031045 | 1.346524  | Mg | 9.657375  | 6.991620  | 8.370763  |
| C | 10.321416 | 12.551397 | 3.241758  | Mg | 11.095238 | 10.582973 | 10.189004 |
| H | 9.312524  | 12.745694 | 2.888098  | N  | 7.816885  | 6.032415  | 8.339103  |
| C | 10.511627 | 12.122585 | 4.561256  | C  | 6.888986  | 6.211254  | 9.265249  |
| C | 14.340247 | 11.718577 | 4.583973  | C  | 6.970219  | 7.226788  | 10.242631 |
| H | 14.281700 | 10.990944 | 5.402903  | H  | 6.216305  | 7.181513  | 11.020880 |
| C | 14.962910 | 12.983050 | 5.192520  | C  | 7.816849  | 8.342930  | 10.291945 |
| H | 15.039693 | 13.773457 | 4.437571  | N  | 8.813296  | 8.582617  | 9.424291  |
| H | 15.968396 | 12.774727 | 5.574903  | C  | 5.672347  | 5.314212  | 9.342412  |
| H | 14.355730 | 13.364024 | 6.019405  | H  | 5.813756  | 4.564441  | 10.128470 |

|   |           |           |           |   |           |           |           |
|---|-----------|-----------|-----------|---|-----------|-----------|-----------|
| H | 5.500232  | 4.783887  | 8.404304  | H | 7.694717  | 1.958600  | 10.741690 |
| H | 4.781705  | 5.894212  | 9.596790  | C | 9.855415  | 2.931463  | 9.272458  |
| C | 7.582735  | 9.298939  | 11.433189 | H | 10.493913 | 3.759398  | 8.950479  |
| H | 6.818050  | 8.919053  | 12.111957 | H | 10.119921 | 2.688891  | 10.307245 |
| H | 7.287724  | 10.300094 | 11.109085 | H | 10.101618 | 2.064375  | 8.654354  |
| H | 8.518885  | 9.404941  | 11.988382 | C | 10.740431 | 13.114202 | 12.038156 |
| N | 9.310789  | 9.911788  | 9.441304  | C | 10.060166 | 12.782666 | 13.236627 |
| C | 8.504065  | 10.828393 | 8.916361  | C | 10.496468 | 13.329840 | 14.443864 |
| C | 8.697438  | 12.229159 | 9.067683  | H | 9.985860  | 13.061982 | 15.363719 |
| H | 8.032352  | 12.835194 | 8.464327  | C | 11.572702 | 14.210656 | 14.489019 |
| C | 9.424810  | 12.950528 | 10.032792 | H | 11.904131 | 14.624876 | 15.437379 |
| N | 10.356047 | 12.422941 | 10.841101 | C | 12.206373 | 14.568500 | 13.306810 |
| C | 7.264682  | 10.390564 | 8.175110  | H | 13.031518 | 15.275746 | 13.334267 |
| H | 7.468137  | 9.498482  | 7.576984  | C | 11.805501 | 14.039690 | 12.074638 |
| H | 6.888635  | 11.196554 | 7.543851  | C | 8.844980  | 11.883004 | 13.185442 |
| H | 6.465708  | 10.117338 | 8.873026  | H | 9.004639  | 11.227908 | 12.327114 |
| C | 9.114904  | 14.431173 | 10.114966 | C | 7.571355  | 12.696765 | 12.910886 |
| H | 9.228669  | 14.807788 | 11.133579 | H | 7.405956  | 13.429440 | 13.709323 |
| H | 8.105932  | 14.654284 | 9.763712  | H | 6.698530  | 12.035400 | 12.871337 |
| H | 9.821130  | 14.985006 | 9.485715  | H | 7.624457  | 13.235306 | 11.962463 |
| C | 7.705018  | 4.994470  | 7.375227  | C | 8.651489  | 11.011453 | 14.423964 |
| C | 7.394457  | 5.341593  | 6.039627  | H | 9.560277  | 10.462052 | 14.671191 |
| C | 7.392906  | 4.331209  | 5.075612  | H | 7.852261  | 10.284960 | 14.244970 |
| H | 7.155890  | 4.570977  | 4.043828  | H | 8.355508  | 11.603290 | 15.297985 |
| C | 7.700410  | 3.014358  | 5.411661  | C | 12.521273 | 14.494231 | 10.820607 |
| H | 7.705290  | 2.244962  | 4.644311  | H | 12.050021 | 13.966332 | 9.988502  |
| C | 8.007947  | 2.690455  | 6.727134  | C | 14.013019 | 14.134578 | 10.849663 |
| H | 8.260077  | 1.664518  | 6.982499  | H | 14.485385 | 14.346263 | 9.883582  |
| C | 8.012280  | 3.664696  | 7.730870  | H | 14.171304 | 13.078459 | 11.082942 |
| C | 7.060432  | 6.782906  | 5.690125  | H | 14.541018 | 14.717461 | 11.611796 |
| H | 7.757732  | 7.409578  | 6.262049  | C | 12.351416 | 16.000056 | 10.576713 |
| C | 7.249401  | 7.116417  | 4.209926  | H | 12.862123 | 16.583673 | 11.350273 |
| H | 8.224594  | 6.784018  | 3.842862  | H | 11.298944 | 16.294469 | 10.583332 |
| H | 7.179570  | 8.197666  | 4.055778  | H | 12.782300 | 16.284547 | 9.609985  |
| H | 6.480118  | 6.647536  | 3.585792  | O | 11.339804 | 8.042426  | 7.290655  |
| C | 5.640746  | 7.162961  | 6.134443  | C | 10.604413 | 7.246959  | 6.472159  |
| H | 4.898473  | 6.530266  | 5.634878  | H | 9.873163  | 7.993542  | 5.419588  |
| H | 5.427103  | 8.206840  | 5.876808  | C | 10.937308 | 7.404508  | 5.082670  |
| H | 5.513869  | 7.053256  | 7.213180  | H | 10.524691 | 6.653592  | 4.408062  |
| C | 8.370992  | 3.282872  | 9.157161  | N | 12.011473 | 8.171555  | 4.691973  |
| H | 8.196566  | 4.153515  | 9.795459  | C | 12.531484 | 8.027853  | 3.396150  |
| C | 7.496099  | 2.135414  | 9.678947  | C | 13.885200 | 7.637410  | 3.265781  |
| H | 6.429786  | 2.351508  | 9.559186  | C | 14.434859 | 7.484382  | 1.990427  |
| H | 7.706105  | 1.200226  | 9.148167  | H | 15.472654 | 7.171223  | 1.897814  |



|                                  |           |          |           |   |           |           |           |
|----------------------------------|-----------|----------|-----------|---|-----------|-----------|-----------|
| C                                | 13.675162 | 7.721684 | 0.847345  | H | 15.969334 | 3.825376  | 8.568447  |
| H                                | 14.112387 | 7.592062 | -0.138953 | H | 17.272154 | 4.910188  | 8.030345  |
| C                                | 12.356215 | 8.147744 | 0.981224  | C | 15.860492 | 9.223885  | 6.220591  |
| H                                | 11.767835 | 8.374494 | 0.094446  | H | 15.553088 | 9.162142  | 5.170598  |
| C                                | 11.773620 | 8.320404 | 2.240148  | H | 16.943601 | 9.097643  | 6.269562  |
| C                                | 14.732875 | 7.441789 | 4.490932  | H | 15.594262 | 10.222105 | 6.575790  |
| H                                | 15.647174 | 6.885957 | 4.268088  | N | 13.240776 | 9.551245  | 7.190491  |
| H                                | 14.198557 | 6.921879 | 5.289868  | C | 13.248042 | 10.350344 | 8.232164  |
| H                                | 15.044416 | 8.411922 | 4.901153  | C | 12.366227 | 11.481957 | 8.330030  |
| C                                | 10.396869 | 8.908202 | 2.371901  | H | 12.652536 | 12.199363 | 9.096089  |
| H                                | 10.427946 | 9.764215 | 3.052754  | C | 11.676718 | 12.078698 | 7.225528  |
| H                                | 9.661744  | 8.205846 | 2.777311  | N | 11.369808 | 11.431815 | 6.109471  |
| H                                | 10.023080 | 9.256010 | 1.404957  | C | 14.165892 | 10.056596 | 9.383052  |
| C                                | 12.892351 | 3.527592 | 7.255490  | H | 13.987443 | 9.035695  | 9.734392  |
| C                                | 12.652190 | 4.313352 | 5.976406  | H | 14.002291 | 10.750878 | 10.204273 |
| H                                | 12.656381 | 5.376557 | 6.247135  | H | 15.211689 | 10.119358 | 9.067169  |
| C                                | 11.283750 | 3.995468 | 5.365487  | C | 11.397626 | 13.557120 | 7.324666  |
| H                                | 10.470863 | 4.230024 | 6.058370  | H | 12.184679 | 14.110055 | 6.799425  |
| H                                | 11.134368 | 4.580108 | 4.452934  | H | 11.381532 | 13.880090 | 8.365587  |
| H                                | 11.193959 | 2.941981 | 5.081834  | H | 10.443692 | 13.813806 | 6.858869  |
| C                                | 13.773988 | 4.099456 | 4.952139  | C | 13.689186 | 4.437843  | 8.984471  |
| H                                | 14.743319 | 4.407428 | 5.353819  | C | 13.803165 | 4.389138  | 10.395455 |
| H                                | 13.841692 | 3.042817 | 4.667591  | C | 13.406153 | 3.221821  | 11.053242 |
| H                                | 13.586955 | 4.688515 | 4.047246  | H | 13.491061 | 3.163290  | 12.134196 |
| H                                | 11.073301 | 6.123534 | 9.182296  | C | 12.904158 | 2.130074  | 10.349493 |
| TS4.log                          |           |          |           | H | 12.605124 | 1.230370  | 10.880643 |
| SCF (B3PW91) = -4011.86629329    |           |          |           | C | 12.770824 | 2.203464  | 8.968109  |
| E(SCF)+ZPE(0 K)= -4009.979418    |           |          |           | H | 12.360330 | 1.357368  | 8.422261  |
| H(298 K)= -4009.869769           |           |          |           | C | 14.382949 | 5.562766  | 11.171373 |
| G(298 K)= -4010.117289           |           |          |           | H | 14.164923 | 6.467393  | 10.590309 |
| Lowest Frequency = -476.9764cm-1 |           |          |           | C | 13.769457 | 5.735373  | 12.564245 |
| Mg 12.508248 7.038190 8.150496   |           |          |           | H | 12.675920 | 5.740842  | 12.539732 |
| Mg 11.695061 9.394896 5.862240   |           |          |           | H | 14.086074 | 6.688187  | 12.997969 |
| N 14.058565 5.636081 8.307443    |           |          |           | H | 14.091682 | 4.943774  | 13.250593 |
| C 15.294401 5.760402 7.818776    |           |          |           | C | 15.910953 | 5.455329  | 11.283886 |
| C 15.806188 6.924805 7.214444    |           |          |           | H | 16.195336 | 4.525732  | 11.790520 |
| H 16.817142 6.854336 6.828093    |           |          |           | H | 16.310336 | 6.294487  | 11.864949 |
| C 15.143149 8.142720 6.981755    |           |          |           | H | 16.391487 | 5.468601  | 10.303692 |
| N 13.889133 8.313246 7.361932    |           |          |           | C | 11.126578 | 12.189959 | 4.919348  |
| C 16.248241 4.582109 7.834134    |           |          |           | C | 12.248354 | 12.661999 | 4.200063  |
| H 16.241428 4.109449 6.845950    |           |          |           | C | 12.034956 | 13.294632 | 2.971651  |
|                                  |           |          |           | H | 12.889260 | 13.652129 | 2.403334  |
|                                  |           |          |           | C | 10.755548 | 13.451106 | 2.454934  |
|                                  |           |          |           | H | 10.608596 | 13.937972 | 1.494906  |

|    |           |           |           |    |           |           |           |
|----|-----------|-----------|-----------|----|-----------|-----------|-----------|
| C  | 9.662099  | 12.974374 | 3.170167  | Mg | 10.913824 | 10.485585 | 10.119415 |
| H  | 8.667270  | 13.097473 | 2.755397  | N  | 7.681413  | 6.547918  | 7.987015  |
| C  | 9.821721  | 12.343288 | 4.406798  | C  | 6.547801  | 6.796534  | 8.643260  |
| C  | 13.675031 | 12.420620 | 4.667348  | C  | 6.355028  | 7.900660  | 9.496869  |
| H  | 13.646115 | 12.006389 | 5.679793  | H  | 5.426500  | 7.889521  | 10.057731 |
| C  | 14.503110 | 13.710067 | 4.715725  | C  | 7.184693  | 9.006980  | 9.762103  |
| H  | 14.658569 | 14.131005 | 3.716612  | N  | 8.338951  | 9.224318  | 9.120536  |
| H  | 15.491122 | 13.508661 | 5.143055  | C  | 5.385054  | 5.835469  | 8.528031  |
| H  | 14.018004 | 14.477748 | 5.327085  | H  | 5.317237  | 5.413327  | 7.522550  |
| C  | 14.341231 | 11.369386 | 3.769355  | H  | 4.442877  | 6.328906  | 8.773949  |
| H  | 13.820696 | 10.407806 | 3.822587  | H  | 5.517926  | 4.996772  | 9.218402  |
| H  | 15.382145 | 11.210252 | 4.066670  | C  | 6.734098  | 9.891430  | 10.904341 |
| H  | 14.333065 | 11.681811 | 2.720104  | H  | 5.656673  | 10.070754 | 10.865639 |
| C  | 8.627590  | 11.791354 | 5.161412  | H  | 7.251982  | 10.846267 | 10.952238 |
| H  | 8.878526  | 11.825484 | 6.227786  | H  | 6.945148  | 9.356517  | 11.837875 |
| C  | 8.375946  | 10.325739 | 4.785494  | N  | 9.016681  | 10.438140 | 9.338696  |
| H  | 7.544180  | 9.909342  | 5.361876  | C  | 8.400925  | 11.562734 | 8.983002  |
| H  | 9.242401  | 9.682937  | 4.967585  | C  | 8.851158  | 12.839244 | 9.388492  |
| H  | 8.132709  | 10.242737 | 3.721162  | H  | 8.315510  | 13.674150 | 8.949791  |
| C  | 7.350487  | 12.605298 | 4.935201  | C  | 9.700587  | 13.167227 | 10.460883 |
| H  | 7.018882  | 12.555440 | 3.893017  | N  | 10.521153 | 12.298247 | 11.058917 |
| H  | 7.493399  | 13.659214 | 5.194476  | C  | 7.117167  | 11.526972 | 8.191715  |
| H  | 6.531834  | 12.207253 | 5.539919  | H  | 7.105112  | 10.690292 | 7.490012  |
| C  | 11.759551 | 7.610526  | 10.074886 | H  | 6.991356  | 12.467074 | 7.654691  |
| H  | 11.917968 | 6.691051  | 10.671677 | H  | 6.247592  | 11.412941 | 8.846321  |
| N  | 11.373137 | 8.639208  | 10.887641 | C  | 9.630998  | 14.603688 | 10.933145 |
| C  | 11.210012 | 8.302604  | 12.269212 | H  | 9.900205  | 14.692299 | 11.987372 |
| C  | 10.204141 | 7.412003  | 12.708481 | H  | 8.633503  | 15.022307 | 10.785913 |
| C  | 10.208320 | 6.972216  | 14.036564 | H  | 10.336645 | 15.214062 | 10.357887 |
| H  | 9.440959  | 6.270717  | 14.357062 | C  | 7.802778  | 5.348513  | 7.226428  |
| C  | 11.148679 | 7.438559  | 14.948878 | C  | 7.792020  | 5.439008  | 5.814408  |
| H  | 11.135578 | 7.093372  | 15.978967 | C  | 7.930621  | 4.266174  | 5.068913  |
| C  | 12.086734 | 8.379476  | 14.532173 | H  | 7.918759  | 4.314413  | 3.984938  |
| H  | 12.816234 | 8.769168  | 15.238291 | C  | 8.093811  | 3.032186  | 5.692487  |
| C  | 12.133809 | 8.816901  | 13.206098 | H  | 8.201479  | 2.130457  | 5.096007  |
| C  | 9.123505  | 6.956443  | 11.776212 | C  | 8.153463  | 2.964020  | 7.078301  |
| H  | 8.764564  | 7.798436  | 11.180622 | H  | 8.329572  | 2.005643  | 7.559151  |
| H  | 8.276955  | 6.531394  | 12.322686 | C  | 8.025596  | 4.110391  | 7.869538  |
| H  | 9.485756  | 6.214937  | 11.055431 | C  | 7.622578  | 6.789572  | 5.138040  |
| C  | 13.224108 | 9.755594  | 12.776787 | H  | 8.169715  | 7.520972  | 5.747012  |
| H  | 12.826091 | 10.652723 | 12.292320 | C  | 8.211021  | 6.846882  | 3.727675  |
| H  | 13.897996 | 9.266456  | 12.067044 | H  | 9.255638  | 6.524627  | 3.718976  |
| H  | 13.807196 | 10.098018 | 13.635180 | H  | 8.172013  | 7.873249  | 3.352304  |
| Mg | 9.372093  | 7.649587  | 8.337518  | H  | 7.646030  | 6.227128  | 3.022395  |

|   |           |           |           |                    |                |           |          |
|---|-----------|-----------|-----------|--------------------|----------------|-----------|----------|
| C | 6.148169  | 7.218134  | 5.121745  | C                  | 10.992470      | 6.720701  | 6.286545 |
| H | 5.541099  | 6.476658  | 4.590182  | H                  | 10.394123      | 5.864940  | 6.588650 |
| H | 6.030883  | 8.179705  | 4.609816  | C                  | 11.596944      | 6.751222  | 5.057285 |
| H | 5.750810  | 7.324631  | 6.133849  | H                  | 11.728662      | 5.805596  | 4.531945 |
| C | 8.198964  | 3.998547  | 9.375794  | N                  | 11.998364      | 7.912892  | 4.488628 |
| H | 7.926321  | 4.960400  | 9.821090  | C                  | 12.758835      | 7.880478  | 3.305899 |
| C | 7.304666  | 2.917457  | 9.997097  | C                  | 13.918721      | 7.079547  | 3.164371 |
| H | 6.255071  | 3.034799  | 9.709451  | C                  | 14.659946      | 7.167022  | 1.980766 |
| H | 7.618573  | 1.913533  | 9.690868  | H                  | 15.556892      | 6.558417  | 1.883071 |
| H | 7.367067  | 2.958181  | 11.089689 | C                  | 14.287806      | 8.018784  | 0.945971 |
| C | 9.670272  | 3.732951  | 9.721580  | H                  | 14.883123      | 8.074709  | 0.038695 |
| H | 10.313511 | 4.539959  | 9.356128  | C                  | 13.141167      | 8.796989  | 1.087311 |
| H | 9.809838  | 3.664590  | 10.806030 | H                  | 12.830104      | 9.459075  | 0.282059 |
| H | 10.018934 | 2.795095  | 9.279001  | C                  | 12.369207      | 8.737130  | 2.247522 |
| C | 11.081966 | 12.580845 | 12.341491 | C                  | 14.397404      | 6.158833  | 4.257266 |
| C | 10.461122 | 11.982336 | 13.466926 | H                  | 14.016799      | 5.137711  | 4.128438 |
| C | 11.070663 | 12.110825 | 14.715643 | H                  | 14.082433      | 6.497272  | 5.244941 |
| H | 10.617963 | 11.640083 | 15.581906 | H                  | 15.489331      | 6.097790  | 4.264178 |
| C | 12.255845 | 12.824477 | 14.870936 | C                  | 11.131379      | 9.576559  | 2.381616 |
| H | 12.718601 | 12.907311 | 15.850605 | H                  | 11.278967      | 10.410581 | 3.077716 |
| C | 12.836874 | 13.436799 | 13.768999 | H                  | 10.294514      | 8.986314  | 2.765881 |
| H | 13.754101 | 14.006608 | 13.894562 | H                  | 10.843923      | 10.018916 | 1.423994 |
| C | 12.268922 | 13.329689 | 12.494313 | C                  | 13.142778      | 3.353493  | 8.265385 |
| C | 9.130851  | 11.261685 | 13.318859 | C                  | 12.941992      | 3.420369  | 6.761495 |
| H | 9.157401  | 10.718635 | 12.365828 | H                  | 13.222284      | 4.429152  | 6.440235 |
| C | 7.981504  | 12.280394 | 13.246183 | C                  | 11.471097      | 3.206081  | 6.391812 |
| H | 7.984903  | 12.916310 | 14.138689 | H                  | 10.811921      | 3.862767  | 6.961793 |
| H | 7.015097  | 11.766468 | 13.202500 | H                  | 11.299970      | 3.395249  | 5.326640 |
| H | 8.057231  | 12.924742 | 12.367677 | H                  | 11.148599      | 2.179350  | 6.596621 |
| C | 8.847360  | 10.243291 | 14.421081 | C                  | 13.828575      | 2.414614  | 6.016309 |
| H | 9.688767  | 9.565939  | 14.569643 | H                  | 14.884707      | 2.541274  | 6.266886 |
| H | 7.974204  | 9.640556  | 14.150892 | H                  | 13.549596      | 1.385274  | 6.269566 |
| H | 8.618052  | 10.733076 | 15.375032 | H                  | 13.717059      | 2.532218  | 4.932461 |
| C | 12.952392 | 14.020423 | 11.327929 | H                  | 10.554994      | 6.703528  | 9.381696 |
| H | 12.363670 | 13.804219 | 10.430277 |                    |                |           |          |
| C | 14.373078 | 13.486497 | 11.104914 | TS5.log            |                |           |          |
| H | 14.797585 | 13.881041 | 10.175297 |                    |                |           |          |
| H | 14.388118 | 12.396283 | 11.053675 | SCF (B3PW91) =     | -4125.16046927 |           |          |
| H | 15.036420 | 13.780007 | 11.925502 | E(SCF)+ZPE(0 K)=   | -4123.260575   |           |          |
| C | 12.996714 | 15.544330 | 11.513029 | H(298 K)=          | -4123.148650   |           |          |
| H | 13.638632 | 15.814479 | 12.358496 | G(298 K)=          | -4123.400309   |           |          |
| H | 12.005858 | 15.961531 | 11.707263 | Lowest Frequency = | -241.6893cm-1  |           |          |
| H | 13.405764 | 16.028647 | 10.619420 |                    |                |           |          |
| O | 10.742581 | 7.953857  | 6.937839  | Mg                 | 12.636824      | 6.829369  | 8.115108 |

|    |           |           |           |   |           |           |           |
|----|-----------|-----------|-----------|---|-----------|-----------|-----------|
| Mg | 11.449602 | 9.345508  | 6.117806  | H | 16.655935 | 4.443773  | 11.528827 |
| N  | 14.265254 | 5.542289  | 8.178645  | H | 16.702402 | 6.215228  | 11.598995 |
| C  | 15.453179 | 5.758967  | 7.611819  | H | 16.746412 | 5.390258  | 10.035072 |
| C  | 15.845325 | 6.971146  | 7.011322  | C | 11.262885 | 12.173884 | 4.878421  |
| H  | 16.820978 | 6.966631  | 6.538485  | C | 12.418045 | 12.345704 | 4.073827  |
| C  | 15.105321 | 8.154993  | 6.860559  | C | 12.280348 | 12.997792 | 2.846636  |
| N  | 13.882968 | 8.278581  | 7.361289  | H | 13.152581 | 13.140671 | 2.217892  |
| C  | 16.464124 | 4.636745  | 7.507355  | C | 11.043494 | 13.448484 | 2.400061  |
| H  | 16.317787 | 3.870064  | 8.269268  | H | 10.956885 | 13.941286 | 1.435650  |
| H  | 17.485294 | 5.019521  | 7.572766  | C | 9.919179  | 13.252668 | 3.188773  |
| H  | 16.353205 | 4.156713  | 6.528520  | H | 8.952390  | 13.587459 | 2.826145  |
| C  | 15.695742 | 9.254186  | 6.023815  | C | 10.006318 | 12.624706 | 4.436155  |
| H  | 15.232950 | 9.200744  | 5.031856  | C | 13.779938 | 11.824127 | 4.506782  |
| H  | 16.773899 | 9.134989  | 5.906273  | H | 13.603456 | 10.941047 | 5.129278  |
| H  | 15.487322 | 10.245701 | 6.427767  | C | 14.525193 | 12.845766 | 5.379761  |
| N  | 13.167546 | 9.485826  | 7.255423  | H | 14.626338 | 13.802120 | 4.854419  |
| C  | 13.331051 | 10.396881 | 8.182235  | H | 15.532569 | 12.485023 | 5.615625  |
| C  | 12.402645 | 11.499438 | 8.317675  | H | 14.010720 | 13.027092 | 6.326356  |
| H  | 12.715554 | 12.229662 | 9.058326  | C | 14.659542 | 11.393959 | 3.329469  |
| C  | 11.725129 | 12.098750 | 7.204042  | H | 14.145747 | 10.673162 | 2.687206  |
| N  | 11.418377 | 11.432737 | 6.098076  | H | 15.576505 | 10.927593 | 3.701047  |
| C  | 14.502709 | 10.361067 | 9.124398  | H | 14.971364 | 12.246909 | 2.716766  |
| H  | 14.877071 | 9.346588  | 9.269975  | C | 8.741478  | 12.374458 | 5.233107  |
| H  | 14.242793 | 10.794271 | 10.087162 | H | 9.028178  | 12.175231 | 6.271743  |
| H  | 15.312180 | 10.967104 | 8.700364  | C | 8.039590  | 11.120550 | 4.691434  |
| C  | 11.450306 | 13.581940 | 7.276236  | H | 7.076541  | 10.954791 | 5.181283  |
| H  | 12.060231 | 14.110957 | 6.536971  | H | 8.655522  | 10.229783 | 4.851760  |
| H  | 11.674600 | 13.980060 | 8.265366  | H | 7.864055  | 11.209288 | 3.614029  |
| H  | 10.403499 | 13.790745 | 7.047098  | C | 7.811860  | 13.593353 | 5.224780  |
| C  | 14.017990 | 4.293821  | 8.830472  | H | 7.408234  | 13.793257 | 4.227387  |
| C  | 14.216613 | 4.214949  | 10.228596 | H | 8.337724  | 14.492530 | 5.561293  |
| C  | 13.917518 | 3.014213  | 10.874450 | H | 6.951769  | 13.437936 | 5.881908  |
| H  | 14.059314 | 2.936321  | 11.948160 | C | 12.272705 | 7.934016  | 10.184853 |
| C  | 13.427336 | 1.918406  | 10.168171 | H | 12.809722 | 8.584724  | 9.488840  |
| H  | 13.193795 | 0.994469  | 10.690337 | N | 11.039874 | 8.568380  | 10.648665 |
| C  | 13.227031 | 2.014288  | 8.796616  | C | 10.935698 | 8.430634  | 12.080629 |
| H  | 12.832795 | 1.161348  | 8.249876  | C | 9.943634  | 7.633661  | 12.704727 |
| C  | 14.775550 | 5.403018  | 10.994402 | C | 10.010683 | 7.401678  | 14.083576 |
| H  | 14.495839 | 6.296724  | 10.425104 | H | 9.258996  | 6.759014  | 14.535550 |
| C  | 14.211399 | 5.549981  | 12.410715 | C | 10.992024 | 7.976175  | 14.880718 |
| H  | 13.120529 | 5.515764  | 12.406636 | H | 11.022096 | 7.781610  | 15.948914 |
| H  | 14.521461 | 6.511120  | 12.836388 | C | 11.904616 | 8.842103  | 14.290838 |
| H  | 14.587611 | 4.767658  | 13.080232 | H | 12.644312 | 9.352842  | 14.902545 |
| C  | 16.310550 | 5.360082  | 11.036211 | C | 11.891668 | 9.076892  | 12.914258 |

|    |           |           |           |   |           |           |           |
|----|-----------|-----------|-----------|---|-----------|-----------|-----------|
| C  | 8.795173  | 7.027047  | 11.956435 | C | 8.362614  | 2.988838  | 7.039754  |
| H  | 9.118901  | 6.253851  | 11.254776 | H | 8.611868  | 1.983653  | 7.369130  |
| H  | 8.236108  | 7.779609  | 11.402338 | C | 8.329030  | 4.026050  | 7.979994  |
| H  | 8.090818  | 6.553409  | 12.645503 | C | 7.617805  | 7.025043  | 5.669327  |
| C  | 12.921818 | 10.024584 | 12.364947 | H | 8.299437  | 7.637175  | 6.277539  |
| H  | 12.493737 | 10.763804 | 11.674964 | C | 8.018872  | 7.199046  | 4.202951  |
| H  | 13.716093 | 9.504924  | 11.821382 | H | 9.026247  | 6.820868  | 4.010220  |
| H  | 13.370810 | 10.616975 | 13.165578 | H | 7.997598  | 8.260692  | 3.941504  |
| Mg | 9.569669  | 7.572770  | 8.971546  | H | 7.319626  | 6.694436  | 3.526581  |
| Mg | 10.759476 | 10.558707 | 10.003411 | C | 6.202612  | 7.587763  | 5.873387  |
| N  | 7.882693  | 6.408589  | 8.452768  | H | 5.455697  | 6.940016  | 5.400077  |
| C  | 6.676530  | 6.638026  | 8.975681  | H | 6.125310  | 8.578553  | 5.411020  |
| C  | 6.351886  | 7.794258  | 9.708079  | H | 5.951574  | 7.700563  | 6.929287  |
| H  | 5.399852  | 7.782080  | 10.227355 | C | 8.700300  | 3.735348  | 9.425006  |
| C  | 7.081290  | 8.993088  | 9.821776  | H | 8.733300  | 4.693968  | 9.952369  |
| N  | 8.258049  | 9.169416  | 9.215090  | C | 7.679403  | 2.834772  | 10.133832 |
| C  | 5.553452  | 5.648160  | 8.754232  | H | 6.683146  | 3.283274  | 10.173347 |
| H  | 5.854700  | 4.633135  | 9.017143  | H | 7.590898  | 1.868119  | 9.624755  |
| H  | 5.279703  | 5.620681  | 7.694465  | H | 7.998397  | 2.641586  | 11.163839 |
| H  | 4.667372  | 5.919323  | 9.330715  | C | 10.093508 | 3.104254  | 9.513897  |
| C  | 6.492696  | 10.013123 | 10.771728 | H | 10.845565 | 3.712251  | 9.011195  |
| H  | 6.540197  | 9.591558  | 11.782003 | H | 10.408648 | 3.008742  | 10.555963 |
| H  | 5.438201  | 10.200822 | 10.550166 | H | 10.114089 | 2.107453  | 9.060008  |
| H  | 7.026173  | 10.960480 | 10.782242 | C | 10.799740 | 12.793959 | 12.105566 |
| N  | 8.870043  | 10.425359 | 9.259218  | C | 10.116953 | 12.281324 | 13.237400 |
| C  | 8.225461  | 11.484919 | 8.784774  | C | 10.659442 | 12.495746 | 14.505566 |
| C  | 8.659230  | 12.802050 | 9.070028  | H | 10.153115 | 12.093697 | 15.376903 |
| H  | 8.125558  | 13.588101 | 8.545668  | C | 11.841809 | 13.210090 | 14.675608 |
| C  | 9.490141  | 13.226518 | 10.124391 | H | 12.251101 | 13.361235 | 15.670797 |
| N  | 10.306904 | 12.418907 | 10.816106 | C | 12.486531 | 13.737001 | 13.564926 |
| C  | 6.961131  | 11.318159 | 7.981348  | H | 13.401402 | 14.309267 | 13.697109 |
| H  | 6.972286  | 10.378119 | 7.425271  | C | 11.984297 | 13.542317 | 12.273388 |
| H  | 6.846797  | 12.154418 | 7.294530  | C | 8.786358  | 11.566795 | 13.076870 |
| H  | 6.072841  | 11.313137 | 8.618932  | H | 8.832823  | 10.997194 | 12.141365 |
| C  | 9.418698  | 14.699037 | 10.465520 | C | 7.652057  | 12.595885 | 12.941647 |
| H  | 9.621345  | 14.873414 | 11.524411 | H | 7.638005  | 13.258652 | 13.814330 |
| H  | 8.442896  | 15.121046 | 10.217603 | H | 6.680174  | 12.093887 | 12.884122 |
| H  | 10.175612 | 15.245024 | 9.890611  | H | 7.764539  | 13.212757 | 12.046914 |
| C  | 7.985646  | 5.320270  | 7.538081  | C | 8.469878  | 10.585475 | 14.203541 |
| C  | 7.789267  | 5.591091  | 6.160118  | H | 9.306039  | 9.911514  | 14.393896 |
| C  | 7.835834  | 4.521998  | 5.263278  | H | 7.601421  | 9.976307  | 13.932687 |
| H  | 7.682827  | 4.699740  | 4.203917  | H | 8.218552  | 11.104553 | 15.136033 |
| C  | 8.098455  | 3.224157  | 5.697876  | C | 12.736863 | 14.137506 | 11.099823 |
| H  | 8.126453  | 2.406217  | 4.982948  | H | 12.191749 | 13.848663 | 10.196153 |

|   |           |           |           |                    |                |           |           |
|---|-----------|-----------|-----------|--------------------|----------------|-----------|-----------|
| C | 14.160713 | 13.576081 | 11.000832 | H                  | 12.949493      | 7.620467  | 10.978922 |
| H | 14.632505 | 13.862609 | 10.054427 |                    |                |           |           |
| H | 14.162929 | 12.486620 | 11.071861 | TS6.log            |                |           |           |
| H | 14.789369 | 13.953084 | 11.814480 |                    |                |           |           |
| C | 12.782334 | 15.670448 | 11.159413 | SCF (B3PW91) =     | -4125.22175498 |           |           |
| H | 13.369961 | 16.009182 | 12.019502 | E(SCF)+ZPE(0 K)=   | -4123.323988   |           |           |
| H | 11.783723 | 16.103855 | 11.252605 | H(298 K)=          | -4123.211910   |           |           |
| H | 13.251857 | 16.077077 | 10.256718 | G(298 K)=          | -4123.466899   |           |           |
| O | 10.763884 | 7.853171  | 7.338857  | Lowest Frequency = | -815.0703cm-1  |           |           |
| C | 10.918403 | 6.648642  | 6.602103  |                    |                |           |           |
| H | 10.330241 | 5.797052  | 6.931114  | Mg                 | 12.551102      | 6.708460  | 7.937389  |
| C | 11.383676 | 6.714877  | 5.307599  | Mg                 | 11.615271      | 9.300316  | 5.780031  |
| H | 11.455592 | 5.776632  | 4.757356  | N                  | 14.134138      | 5.409787  | 8.165588  |
| N | 11.719965 | 7.882994  | 4.720278  | C                  | 15.393631      | 5.669957  | 7.788528  |
| C | 12.411669 | 7.900784  | 3.493528  | C                  | 15.850332      | 6.907477  | 7.302025  |
| C | 13.581006 | 7.135429  | 3.262401  | H                  | 16.893207      | 6.937355  | 7.006776  |
| C | 14.264590 | 7.287238  | 2.050454  | C                  | 15.121003      | 8.098062  | 7.078459  |
| H | 15.170060 | 6.705560  | 1.889443  | N                  | 13.833229      | 8.173600  | 7.358166  |
| C | 13.822726 | 8.163091  | 1.065763  | C                  | 16.422669      | 4.559246  | 7.805448  |
| H | 14.374460 | 8.271298  | 0.136160  | H                  | 16.176488      | 3.776726  | 8.525414  |
| C | 12.659208 | 8.896294  | 1.287328  | H                  | 17.419469      | 4.948082  | 8.025746  |
| H | 12.288817 | 9.574220  | 0.521754  | H                  | 16.461193      | 4.093609  | 6.814460  |
| C | 11.946115 | 8.775244  | 2.480497  | C                  | 15.817849      | 9.282119  | 6.463161  |
| C | 14.124111 | 6.165041  | 4.277519  | H                  | 16.874564      | 9.078104  | 6.284367  |
| H | 13.741900 | 5.150843  | 4.108192  | H                  | 15.730349      | 10.174111 | 7.089560  |
| H | 13.858077 | 6.446504  | 5.296266  | H                  | 15.334310      | 9.517364  | 5.508924  |
| H | 15.215032 | 6.114751  | 4.227476  | N                  | 13.134738      | 9.383026  | 7.173406  |
| C | 10.672178 | 9.543409  | 2.674670  | C                  | 13.116386      | 10.236482 | 8.184460  |
| H | 10.747760 | 10.262521 | 3.494125  | C                  | 12.325985      | 11.419520 | 8.171532  |
| H | 9.842549  | 8.873239  | 2.912489  | H                  | 12.443474      | 12.058394 | 9.037995  |
| H | 10.415634 | 10.121368 | 1.783273  | C                  | 11.648822      | 11.992855 | 7.081093  |
| C | 13.510589 | 3.196386  | 8.105179  | N                  | 11.372104      | 11.326591 | 5.952062  |
| C | 13.279200 | 3.271949  | 6.606069  | C                  | 13.964906      | 10.001637 | 9.409102  |
| H | 13.583904 | 4.271180  | 6.281982  | H                  | 14.245637      | 8.952645  | 9.500595  |
| C | 11.798843 | 3.104120  | 6.247383  | H                  | 13.425258      | 10.294787 | 10.312927 |
| H | 11.174640 | 3.843332  | 6.751204  | H                  | 14.882050      | 10.598023 | 9.352985  |
| H | 11.645983 | 3.212196  | 5.167581  | C                  | 11.216960      | 13.434740 | 7.224074  |
| H | 11.424449 | 2.116935  | 6.538552  | H                  | 11.086497      | 13.913122 | 6.251407  |
| C | 14.129555 | 2.244080  | 5.847580  | H                  | 11.935801      | 14.012560 | 7.809587  |
| H | 15.187241 | 2.316723  | 6.115585  | H                  | 10.254978      | 13.463052 | 7.752025  |
| H | 13.802842 | 1.221978  | 6.069809  | C                  | 13.780193      | 4.127012  | 8.678636  |
| H | 14.037698 | 2.392725  | 4.765791  | C                  | 13.698780      | 3.949730  | 10.081301 |
| C | 11.215104 | 6.306729  | 9.905077  | C                  | 13.267481      | 2.717469  | 10.578135 |
| O | 11.404879 | 5.556354  | 10.813878 | H                  | 13.206361      | 2.565096  | 11.651359 |

|   |           |           |           |    |           |           |           |
|---|-----------|-----------|-----------|----|-----------|-----------|-----------|
| C | 12.902003 | 1.681983  | 9.722803  | H  | 12.765570 | 7.495042  | 11.280121 |
| H | 12.564004 | 0.732406  | 10.128706 | N  | 11.426561 | 9.115621  | 11.647738 |
| C | 12.963235 | 1.873958  | 8.347522  | C  | 11.454482 | 8.860978  | 13.039569 |
| H | 12.667151 | 1.068711  | 7.679712  | C  | 10.510374 | 7.971204  | 13.601602 |
| C | 14.096180 | 5.073766  | 11.022926 | C  | 10.589729 | 7.659213  | 14.962333 |
| H | 13.932547 | 6.009977  | 10.473996 | H  | 9.865178  | 6.970436  | 15.391690 |
| C | 13.266353 | 5.115616  | 12.310025 | C  | 11.563477 | 8.237448  | 15.771902 |
| H | 12.192348 | 5.118908  | 12.100039 | H  | 11.608920 | 7.995929  | 16.830471 |
| H | 13.495987 | 6.017838  | 12.886528 | C  | 12.470300 | 9.140449  | 15.219036 |
| H | 13.480904 | 4.260750  | 12.960074 | H  | 13.230124 | 9.599499  | 15.847702 |
| C | 15.593852 | 5.015681  | 11.356505 | C  | 12.435959 | 9.455133  | 13.857995 |
| H | 15.841823 | 4.066691  | 11.845379 | C  | 9.422598  | 7.374448  | 12.747849 |
| H | 15.868264 | 5.830971  | 12.035121 | H  | 9.756212  | 6.464219  | 12.230667 |
| H | 16.207716 | 5.105135  | 10.457333 | H  | 9.102346  | 8.073740  | 11.967659 |
| C | 11.163756 | 12.036439 | 4.734542  | H  | 8.551185  | 7.101464  | 13.350019 |
| C | 12.305040 | 12.347513 | 3.956484  | C  | 13.453650 | 10.374302 | 13.247792 |
| C | 12.117334 | 12.940106 | 2.705008  | H  | 12.966405 | 11.171085 | 12.680879 |
| H | 12.982394 | 13.191539 | 2.098138  | H  | 14.102306 | 9.832249  | 12.549394 |
| C | 10.841228 | 13.201031 | 2.218708  | H  | 14.081021 | 10.838844 | 14.012568 |
| H | 10.712177 | 13.651577 | 1.238357  | Mg | 9.120181  | 8.111906  | 8.002914  |
| C | 9.728333  | 12.883932 | 2.991130  | Mg | 10.375338 | 10.382682 | 10.404078 |
| H | 8.737898  | 13.092548 | 2.599327  | N  | 7.690824  | 6.608467  | 8.018720  |
| C | 9.865005  | 12.308303 | 4.258033  | C  | 6.562989  | 6.646316  | 8.745323  |
| C | 13.707819 | 12.061122 | 4.469043  | C  | 6.228561  | 7.668751  | 9.645064  |
| H | 13.619362 | 11.341751 | 5.290596  | H  | 5.341001  | 7.496464  | 10.243015 |
| C | 14.332558 | 13.334660 | 5.055702  | C  | 6.898139  | 8.887622  | 9.897066  |
| H | 14.441336 | 14.105468 | 4.283798  | N  | 7.889294  | 9.325767  | 9.132853  |
| H | 15.325301 | 13.123099 | 5.468501  | C  | 5.579830  | 5.499933  | 8.641578  |
| H | 13.711273 | 13.745830 | 5.856990  | H  | 5.977881  | 4.593858  | 9.109476  |
| C | 14.617137 | 11.432844 | 3.407856  | H  | 5.389124  | 5.248533  | 7.594340  |
| H | 14.182565 | 10.515474 | 2.999028  | H  | 4.633010  | 5.746824  | 9.124333  |
| H | 15.589400 | 11.185850 | 3.847539  | C  | 6.469796  | 9.688550  | 11.102596 |
| H | 14.809622 | 12.115305 | 2.572935  | H  | 5.680280  | 9.176573  | 11.654473 |
| C | 8.645310  | 11.931516 | 5.081458  | H  | 6.124748  | 10.692867 | 10.843097 |
| H | 8.931938  | 11.977027 | 6.139380  | H  | 7.330445  | 9.828498  | 11.764855 |
| C | 8.228305  | 10.489262 | 4.764693  | N  | 8.505938  | 10.536938 | 9.528330  |
| H | 7.323066  | 10.200836 | 5.311142  | C  | 7.956741  | 11.655849 | 9.079418  |
| H | 9.005595  | 9.761942  | 5.019186  | C  | 8.419173  | 12.930322 | 9.464564  |
| H | 8.021667  | 10.382876 | 3.694853  | H  | 7.879191  | 13.767818 | 9.036793  |
| C | 7.466399  | 12.885266 | 4.870688  | C  | 9.348697  | 13.258968 | 10.468680 |
| H | 7.068858  | 12.821935 | 3.852249  | N  | 10.175932 | 12.386881 | 11.056771 |
| H | 7.755116  | 13.924352 | 5.057480  | C  | 6.755888  | 11.593018 | 8.170386  |
| H | 6.645382  | 12.628893 | 5.544483  | H  | 6.924215  | 10.877042 | 7.362200  |
| C | 11.902909 | 8.053988  | 10.914161 | H  | 6.535632  | 12.574970 | 7.751513  |

|   |           |           |           |   |           |           |           |
|---|-----------|-----------|-----------|---|-----------|-----------|-----------|
| H | 5.868517  | 11.245067 | 8.708511  | H | 9.166062  | 10.733030 | 12.776125 |
| C | 9.336073  | 14.718101 | 10.876352 | C | 7.854435  | 12.350909 | 13.288940 |
| H | 9.699616  | 14.864570 | 11.894174 | H | 7.805593  | 13.184273 | 13.998788 |
| H | 8.328821  | 15.132259 | 10.799056 | H | 6.948750  | 11.747394 | 13.415612 |
| H | 9.982626  | 15.291155 | 10.203135 | H | 7.842207  | 12.756306 | 12.276130 |
| C | 7.932181  | 5.444286  | 7.228031  | C | 8.930390  | 10.754330 | 14.886745 |
| C | 7.730711  | 5.495794  | 5.831903  | H | 9.827069  | 10.196839 | 15.161613 |
| C | 8.015250  | 4.359325  | 5.067129  | H | 8.105719  | 10.039483 | 14.800617 |
| H | 7.850647  | 4.386662  | 3.993495  | H | 8.679574  | 11.443428 | 15.702078 |
| C | 8.511506  | 3.201441  | 5.651278  | C | 12.632524 | 14.094876 | 10.888945 |
| H | 8.742275  | 2.333876  | 5.039538  | H | 11.962949 | 13.781848 | 10.082156 |
| C | 8.729812  | 3.167137  | 7.024862  | C | 14.012291 | 13.470127 | 10.638237 |
| H | 9.146615  | 2.271105  | 7.475577  | H | 14.373235 | 13.709044 | 9.631660  |
| C | 8.440617  | 4.269192  | 7.832382  | H | 13.982839 | 12.384513 | 10.742407 |
| C | 7.212579  | 6.744416  | 5.140976  | H | 14.746359 | 13.847386 | 11.358594 |
| H | 7.210740  | 7.554739  | 5.878899  | C | 12.745391 | 15.625447 | 10.847277 |
| C | 8.121793  | 7.166629  | 3.981825  | H | 13.487222 | 15.984896 | 11.568647 |
| H | 9.133527  | 7.371212  | 4.342087  | H | 11.796820 | 16.114118 | 11.081793 |
| H | 7.732892  | 8.070481  | 3.504295  | H | 13.067162 | 15.957194 | 9.853812  |
| H | 8.181508  | 6.393018  | 3.209236  | O | 10.364798 | 7.925160  | 6.517371  |
| C | 5.764005  | 6.553728  | 4.671921  | C | 10.945231 | 6.686619  | 6.182884  |
| H | 5.694148  | 5.742427  | 3.938419  | H | 10.335266 | 5.806663  | 6.386855  |
| H | 5.387226  | 7.468020  | 4.199886  | C | 11.716058 | 6.677062  | 5.017905  |
| H | 5.103241  | 6.306635  | 5.508773  | H | 12.030796 | 5.715429  | 4.614041  |
| C | 8.743012  | 4.205138  | 9.320282  | N | 12.057876 | 7.822404  | 4.416920  |
| H | 8.203726  | 5.019501  | 9.814299  | C | 12.828394 | 7.841810  | 3.238830  |
| C | 8.305365  | 2.890437  | 9.974660  | C | 14.065516 | 7.170354  | 3.107866  |
| H | 7.258622  | 2.656915  | 9.754436  | C | 14.796039 | 7.326530  | 1.924201  |
| H | 8.915640  | 2.046190  | 9.636653  | H | 15.755125 | 6.820307  | 1.834403  |
| H | 8.420160  | 2.956466  | 11.061602 | C | 14.330649 | 8.115603  | 0.878505  |
| C | 10.237130 | 4.449445  | 9.545342  | H | 14.917584 | 8.226944  | -0.029039 |
| H | 10.508220 | 5.442916  | 9.175591  | C | 13.102304 | 8.760363  | 1.007423  |
| H | 10.496103 | 4.414595  | 10.608574 | H | 12.721080 | 9.372276  | 0.193087  |
| H | 10.851667 | 3.706727  | 9.026096  | C | 12.342194 | 8.635709  | 2.170682  |
| C | 10.873416 | 12.790946 | 12.239095 | C | 14.629982 | 6.305032  | 4.202434  |
| C | 10.379641 | 12.325320 | 13.485014 | H | 14.379214 | 5.247871  | 4.047807  |
| C | 11.072011 | 12.664335 | 14.649411 | H | 14.253894 | 6.589249  | 5.185418  |
| H | 10.716149 | 12.303324 | 15.607728 | H | 15.720771 | 6.375684  | 4.235892  |
| C | 12.219072 | 13.450576 | 14.609418 | C | 11.019202 | 9.339571  | 2.290590  |
| H | 12.742038 | 13.700036 | 15.528618 | H | 11.083874 | 10.207054 | 2.956890  |
| C | 12.690813 | 13.907870 | 13.387881 | H | 10.249222 | 8.678867  | 2.698503  |
| H | 13.589487 | 14.518420 | 13.354847 | H | 10.684760 | 9.716894  | 1.320443  |
| C | 12.039863 | 13.588378 | 12.191229 | C | 13.397601 | 3.087206  | 7.803240  |
| C | 9.103547  | 11.497899 | 13.562411 | C | 13.423092 | 3.266549  | 6.296442  |



|   |           |          |          |   |           |          |           |
|---|-----------|----------|----------|---|-----------|----------|-----------|
| H | 13.780838 | 4.281029 | 6.095148 | H | 15.381932 | 2.323441 | 6.045335  |
| C | 12.013595 | 3.144701 | 5.708432 | H | 14.019845 | 1.247793 | 5.719376  |
| H | 11.320461 | 3.844208 | 6.180342 | H | 14.453392 | 2.495091 | 4.543514  |
| H | 12.019089 | 3.340193 | 4.630136 | C | 11.542481 | 7.880511 | 9.528973  |
| H | 11.605066 | 2.139215 | 5.857136 | O | 10.600682 | 8.745647 | 9.182150  |
| C | 14.377818 | 2.278197 | 5.614775 | H | 11.136865 | 7.090572 | 10.680724 |

## 7) References

- [S1] Intemann J.; Spielmann J.; Sirsch P.; Harder S. *Chem. Eur. J.*, **2013**, *19*, 8478 – 8489.
- [S2] Yow S.; Gates S. J.; White A. J. P.; Crimmin M. R. *Angew. Chem. Int. Ed.*, **2012**, *51*, 12559 – 12563.
- [S3] Green S. P.; Jones C.; Stasch A. *Angew. Chem. Int. Ed.*, **2008**, *47*, 9079–90.
- [S4] Pergosin P. S.; Kumar P. G. A.; Fernandez I. *Chem. Rev.*, **2005**, *105*, 2977–2998.
- [S5] Dolomanov O.V.; Bourhis L. J.; Gildea R. J.; Howard J. A. K.; Puschmann H. *J. Appl. Cryst.*, **2009**, *42*, 339-341.
- [S6] SHELXTL v5.1, Bruker AXS, Madison, WI, 1998.
- [S7] SHELX-2013, Sheldrick G. M. *Acta Cryst.*, **2015**, *C71*, 3-8.
- [S8] Spek A. L. (2003, 2009) PLATON, A Multipurpose Crystallographic Tool, Utrecht University, Utrecht, The Netherlands. See also Spek A. L. *Acta Cryst.*, 2015, **C71**, 9-18.
- [S9] Frisch, M. J.; Trucks, G. W.; Schlegel, H. B.; Scuseria, G. E.; Robb, M. A.; Cheeseman, J. R.; Scalmani, G.; Barone, V.; Mennucci, B.; Petersson, G. A.; Nakatsuji, H.; Caricato, M.; Li, X.; Hratchian, H. P.; Izmaylov, A. F.; Bloino, J.; Zheng, G.; Sonnenberg, J. L.; Hada, M.; Ehara, M.; Toyota, K.; Fukuda, R.; Hasegawa, J.; Ishida, M.; Nakajima, T.; Honda, Y.; Kitao, O.; Nakai, H.; Vreven, T.; Montgomery, J. A., Jr.; Peralta, J. E.; Ogliaro, F.; Bearpark, M.; Heyd, J. J.; Brothers, E.; Kudin, K. N.; Staroverov, V. N.; Kobayashi, R.; Normand, J.; Raghavachari, K.; Rendell, A.; Burant, J. C.; Iyengar, S. S.; Tomasi, J.; Cossi, M.; Rega, N.; Millam, J. M.; Klene, M.; Knox, J. E.; Cross, J. B.; Bakken, V.; Adamo, C.; Jaramillo, J.; Gomperts, R.; Stratmann, R. E.; Yazyev, O.; Austin, A. J.; Cammi, R.; Pomelli, C.; Ochterski, J. W.; Martin, R. L.; Morokuma, K.; Zakrzewski, V. G.; Voth, G. A.; Salvador, P.; Dannenberg, J. J.; Dapprich, S.; Daniels, A. D.; Farkas, Ö.; Foresman, J. B.; Ortiz, J. V.; Cioslowski, J.; Fox, D. J. Gaussian 09, Revision D.01; Gaussian, Inc., Wallingford, CT, 2009.
- [S10] Glendening E. D.; Landis C. R.; Weinhold. F.; *J. Comput. Chem.*, **2013**, *34*, 1429–1437.
- [S11] Keith T. A.; AIMALL (Version 19.10.12). TK Gristmill Software, Overland Park KS, USA., 2019.
- [S12] Cortés-Guzmán F.; Bader R. F. W. *Coord. Chem. Rev.*, **2005**, *249*, 633–662.
- [S13] Stadler B., Gorgas N., Elliott S. J., Crimmin M.R. *ChemRxiv.*, **2024**. (DOI: 10.26434/chemrxiv-2024-7vlzq)
- [S14] Gerbitz K.D. *Hoppe Seylers Z Physiol Chem.* **1977**, Nov; 358(11): 1491-7.
